# Supplementary material for: Diagnostic Accuracy of Tissue Doppler Index E/è for Evaluating Left Ventricular Filling Pressure and Diastolic Dysfunction/Heart Failure With Preserved Ejection Fraction: A Systematic Review and Meta‐Analysis
Source: PubMed Central journal article supplement — J Am Heart Assoc. 2016 Jan 25;5(1):e002530. doi: 10.1161/JAHA.115.002530 (PMC4859370; doi:10.1161/jaha.115.002530), 2016-01-25

## **SUPPLEMENTAL MATERIAL:**

|                                                                                                            |                      |
|------------------------------------------------------------------------------------------------------------|----------------------|
| <b>Appendix 1 – Study Protocol</b>                                                                         | <b>Pages 1 - 6</b>   |
| <b>Appendix 2 - Data sources and search strategy</b>                                                       | <b>Page 7</b>        |
| <b>Appendix 3 – QUADAS-2 questionnaire</b>                                                                 | <b>Pages 8 - 10</b>  |
| <b>Appendix 4 – Excluded full-text studies</b>                                                             | <b>Pages 11 - 12</b> |
| <b>Appendix 5 – Secondary analysis of E/e' correlation with LVFP</b>                                       | <b>Pages 13 - 26</b> |
| <b>Appendix 6 – Secondary analysis of sensitivity/specificity of E/e' cutoffs to predict elevated LVFP</b> | <b>Pages 27 - 41</b> |
| <b>Appendix 7 – Optimal cutoffs and AUC for elevated LVFP</b>                                              | <b>Pages 42 - 44</b> |
| <b>Appendix 8 – Secondary analysis of sensitivity/specificity of E/e' cutoffs to predict normal LVFP</b>   | <b>Pages 45 - 58</b> |

## **APPENDIX 1**

### **Evidence-based assessment of diagnostic accuracy of tissue Doppler echocardiographic index, E/e' for estimation of LV filling pressure and diastolic dysfunction/ heart failure with preserved ejection fraction.**

#### **Protocol for Systematic review and Meta-analysis study.**

We will follow PRISMA guidelines<sup>1</sup> and Cochrane Handbook for Systematic Reviews of Diagnostic Test Accuracy<sup>2</sup> in conducting this study.

#### **Summary**

Left ventricular Diastolic dysfunction (LVDD) causing heart failure with preserved ejection fraction (HFpEF) is a major clinical problem. Although echocardiography is recommended for noninvasive evaluation of LVDD/HFpEF and is currently routinely used in clinical practice and research, the diagnostic accuracy of echocardiographic variables is not well defined. We hypothesize that commonly utilized echocardiographic tissue Doppler index E/e' for estimating left ventricular filling pressure and diagnosis of LVDD/HFpEF is not very well validated.

#### **Background**

##### **Target conditions being diagnosed**

Diastolic dysfunction is an important cause of Heart failure (HF) with preserved ejection fraction (pEF) and a major medical and public health issue.<sup>3-6</sup> The diagnosis of HFpEF is more challenging than the diagnosis of HF with reduced EF because it is largely one of excluding other potential non-cardiac causes of symptoms suggestive of HF. Epidemiological studies indicate that varying severity of diastolic dysfunction is frequently present in asymptomatic population.<sup>3</sup> Diastolic dysfunction is predicative of developing overt heart failure and all-cause mortality.<sup>3,4</sup> Furthermore, there is increasing prevalence of HFpEF but no significant improvement in survival with time when compared to HF with reduced EF.<sup>5,6</sup>

##### **Index tests**

Echocardiography is the cornerstone for the noninvasive evaluation and quantitation of diastolic dysfunction.<sup>7,8</sup> Myocardial stiffness and relaxation abnormalities in diastolic dysfunction result in elevated LVFP that is indirectly evaluated by echocardiography.<sup>7,8</sup>

Pulsed-wave Doppler technique is performed in the apical 4-chamber view to obtain peak early (E) and late (A) mitral inflow velocities, which primarily reflect pressure gradient between the left atrium and left ventricle during early and late diastolic filling, respectively.<sup>7</sup> Tissue Doppler imaging (TDI) is implemented to acquire mitral annular velocities.<sup>7,8</sup> In conjunction with mitral peak early filling velocity E, the ratio of E/e' can be applied for the estimation of LVFP.<sup>7</sup> The American Society of Echocardiography (ASE) guidelines suggest that LVFP is elevated when E/e' > 12-15 (based on location) or normal when E/e' < 8.<sup>7,8</sup>

##### **Reference tests**

“Gold” or superior (standard) reference tests to evaluate LV diastolic function are based on invasive LV catheterization. These include LVFP measurements, LV relaxation time constant (tau) and parameters of LV myocardial and/or chamber stiffness. There are accepted cutoffs for each of invasive measurements, so that values above cutoff typically indicate elevated LVFP and/ LV diastolic dysfunction. For the LVFP, such cutoffs are LVEDP >16 mmHg or PCWP >12 mmHg; for LV myocardial wall diastolic relaxation time, it is Tau > 48 ms; for myocardial/chamber stiffness, corresponding cutoffs are based on specific parameter calculated.<sup>7,9</sup>

## **Rationale**

Despite the clinical importance of mitral flow and tissue Doppler parameters in evaluating diastolic dysfunction, there is lack of rigorous evaluation of their diagnostic accuracy when compared to invasive standards. Apart from routine clinical use, these echocardiographic indices are extensively used in clinical trials and applied research to assess the changes in LV diastolic function or LVFP.<sup>10-12</sup> We therefore decided to evaluate diagnostic accuracy and clinical utility of E/e' in prediction LVFP and/or HFpEF.

## **Objectives**

1. To perform a search of publications in medical scientific journals evaluating clinical evidence of the relationship between echocardiographic E/e' and LV filling pressure, LV relaxation time constant or LV myocardium/chamber stiffness in preserved ejection fraction. We consider the invasive measurements of LV diastolic function as a reference test.
2. To summarize the clinical evidences/ diagnostic accuracy of echocardiographic E/e' for estimating LV filling pressure and the diagnosis of LVDD/HFpEF.

## **Methods**

### **Study search methodology:**

Original clinical studies that evaluate invasive parameters of diastolic function including LVFP and echocardiographic tissue Doppler E/e' index at rest in patient cohorts with preserved ejection fraction will be screened and analyzed from PubMed, Scopus, Embase, and Cochrane databases (Figure 1). We will also review bibliography of important papers based on our clinical experience and book monographs. Only human medical studies published in English will be analyzed.

### Search strategy:

We will develop the optimal search strategy for each library with assistance of UAB Reference Service of the UAB Lister Hill medical library.

### Inclusion criteria for the studies:

The studies will be included if the study methodology stated that participants have preserved/normal LVEF (LVEF  $\geq$ 40 %). For studies with mixed groups or studies with no a priori criteria for normal LVEF, the studies will be included if the dataset for LVEF corresponding to Mean-2SD  $\geq$ 40 % is available or can be extracted. For a normal distribution, the latter condition assumes that about 98 % of participants have LVEF  $\geq$  40%. This approach allows for inclusion of all clinically relevant studies since LVEF threshold between 40-50% is typically used to distinguish normal/ preserved LVEF from reduced LVEF group. However the inclusion of studies for primary and secondary analysis will be based on the outline described in the statistical section.

### Exclusion criteria for studies:

Studies will be excluded if the study group has >10% of patients with moderate to severe valvular heart disease, cardiomyopathy (hypertrophic, restrictive), age < 18 years, congenital heart disease, acute coronary syndrome, septic shock, cardiac transplant, significant arrhythmias that precluded from interpretation of index and / or reference test and less than 10 participants with preserved EF. Studies will be excluded if study reference tests are only based on non-invasive criteria of LVDD/HFpEF.

### Index tests:

Ratio of echocardiographic mitral flow and tissue Doppler derived parameter- E/e'<sub>lateral</sub>, E/e'<sub>septal</sub> or E/e'<sub>mean</sub>.

Reference tests:

Invasive LVFP measurements of LV end diastolic pressure (LVEDP), LV mean diastolic pressure (LVMDP), LV Pre-A diastolic pressure (LV pre-A DP) or pulmonary capillary wedge pressure (PCWP); LV relaxation time constant (Tau); LV stiffness parameters.

Clinical diagnosis of LVDD/HFpEF confirmed based on clinical sign and symptoms with evidence of elevated LVFP or impaired LV relaxation/ chamber stiffness with or without additional biochemical markers and/or other ancillary tests.

**Data collection and analysis:**

Selection of studies:

Studies will be screened from the list of citation pooled from PubMed, Scopus, Embase, and Cochrane databases based on search criteria. Other sources would also be evaluated for additional studies. Initial screening includes the analysis of the title and abstract of the cited study to identify studies that could contain data of our interest. A full text of these studies will be evaluated. If the study does not fit our conditions after in-depth text evaluation, the reason for study exclusion will be documented. Disagreements between reviewers will be solved by discussion.

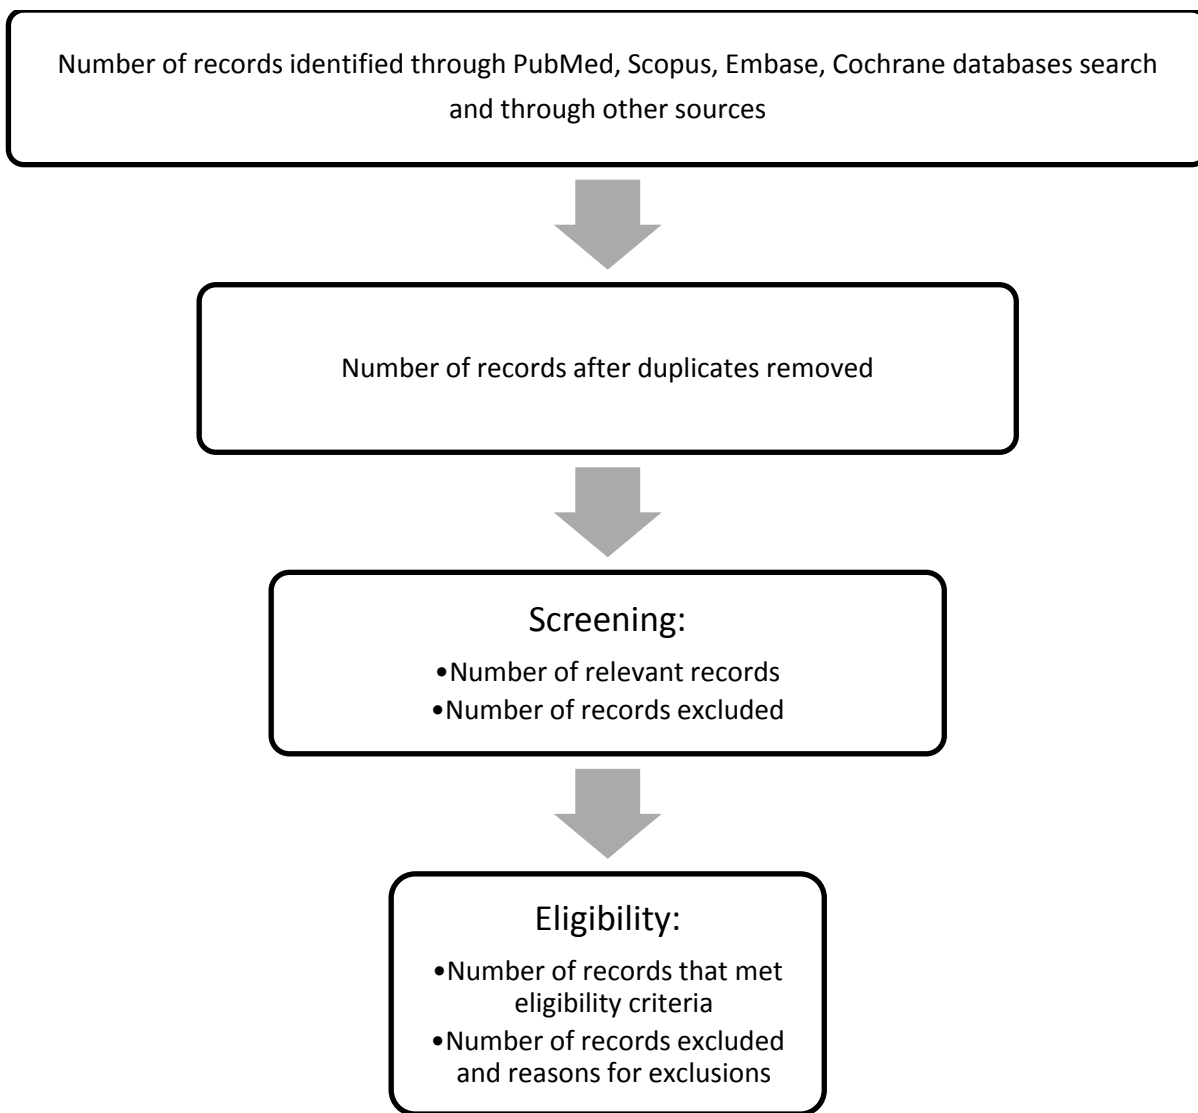

**Figure 1. Flowchart for Systematic review.**

### Inclusion and classification of studies:

Studies for primary analysis: The study contains either data of Pearson's correlation(s) between E/e' and reference standard(s) or the study contains data sufficient to create 2x2 diagnostic tables (true positive, false positive, false negative, true negative) for E/e' cutoff(s) recommended by ASE to identify elevated/ normal LVFP and LVDD/HFpEF. Such data is available for the participants with LVEF  $\geq$  50%.

Studies for supplemental analysis: 1) the study contains data required for the primary analysis but such data is available for the participants with LVEF  $\geq$  40%; 2) the study does not contain data sufficient to create 2x2 table for recommended by ASE E/e' cutoffs but contains other valuable diagnostic data (ROC AUC value and/ or optimal E/e' cutoff value).

### Data extraction:

Data will be extracted from selected studies according to a data collection form. Disagreements will be solved by consensus. Extracted information about evaluated studies and digital data will be input in the MS Word and Excel tables.

The following study information/digital data (what is available) will be collected:

1. PMID number (if available).
2. Year of publication.
3. Number of patients with preserved LVEF.
4. Mean age, mean LVEF or LVEF cutoff.
5. Number of males/females.
6. Number of patients with HFpEF, coronary artery disease, systemic hypertension, diabetes mellitus in study cohort.
7. Clinical indications for catheterization.
8. Index test(s).
9. Reference test(s).
10. Correlation size between echocardiographic index test values and invasive reference test values.
11. True positive, false positive, true negative, and false negative data for specific index and reference test cutoff.
12. ROC AUC values for specific reference test cutoff.

If data of interest not fully provided, additional calculations will be made to extract data of interest from graphical presentations and/or tables where available.

### Assessment of methodological quality of evaluated studies:

Assessment of methodological quality of evaluated studies will be performed by a modified QUADAS-2 (see Appendix S3). Risk of bias will be tested for four domains which are patient selection, index test, reference test, and flow and timing; Applicability was tested for patient selection, index and reference test domains. This questionnaire is expanded to incorporate the findings from the study of Naaktgeboren et al, 2013<sup>13</sup> to include the risks of differential verification on index test accuracy in clinical study.

### Statistical analysis and data synthesis:

Statistical methodology would be based on approaches described in Cochrane Handbook for Systematic Reviews of Diagnostic Test Accuracy.<sup>2</sup> Forest plots of sensitivity, specificity with 95% confidence intervals will be computed in OneMetaAnalyst.<sup>14</sup> Heterogeneity amongst the studies will be estimated by  $I^2$  statistic. The correlation will be classified as negligible when  $r$  is between 0 – 0.3, low when  $r$  is 0.3 – 0.5, moderate when  $r$  is 0.5 – 0.7 and high when  $r$  is 0.7 – 0.9.<sup>15</sup> To obtain summary points taking into account within-study variability and between-study variability (heterogeneity), we will perform hierarchical summary receiver operating characteristic (HSROC) analysis. The Rutter and Gatsonis HSROC model<sup>16</sup> will be constructed in OneMetaAnalyst<sup>14</sup> for each category of diagnostic analysis. The summary sensitivity and specificity values will be also utilized to calculate the relationship of positive predictive value (diagnostic precision) with prevalence for elevated or normal LVFP ranging from 5% to 95%. The latter relationships will be compiled and graphed using Matlab R2013b. Additional statistical methodologies may be required based on discussion with experts in this field. We will also explore heterogeneity by using the different sources of heterogeneity as covariate(s) in HSROC analysis. Emphasis will be placed on evaluating the robustness of evidence and its clinical applicability taking into account expected heterogeneity in the studies.

### Sensitivity analysis:

We will perform secondary analyses including forest plots, HSROC analysis and summary estimates of sensitivity and specificity for the subgroups of studies if a sufficient number of studies are present for identified subgroups.

### **References:**

1. Moher D, Liberati A, Tetzlaff J, Altman DG. Preferred reporting items for systematic reviews and meta-analyses: the PRISMA statement. *BMJ*. 2009;339:b2535.
2. Macaskill P, Gatsonis C, Deeks J, Harbord R, Takwoingi Y. Chapter 10: Analysing and Presenting Results. In: Deeks J, Bossuyt P, Gatsonis C, editors. *Cochrane Handbook for Systematic Reviews of Diagnostic Test Accuracy Version 1*. The Cochrane Collaboration; 2010.
3. Redfield MM, Jacobsen SJ, Burnett JC, Mahoney DW, Bailey KR, Rodeheffer RJ. Burden of systolic and diastolic ventricular dysfunction in the community: appreciating the scope of the heart failure epidemic. *JAMA*. 2003;289:194–202.
4. Kane GC, Karon BL, Mahoney DW, Redfield MM, Roger VL, Burnett JC, Jacobsen SJ, Rodeheffer RJ. Progression of left ventricular diastolic dysfunction and risk of heart failure. *JAMA*. 2011;306:856–63.
5. Bursi F, Weston SA, Redfield MM, Jacobsen SJ, Pakhomov S, Nkomo VT, Meverden RA, Roger VL. Systolic and diastolic heart failure in the community. *JAMA*. 2006;296:2209–16.
6. Owan TE, Hodge DO, Herges RM, Jacobsen SJ, Roger VL, Redfield MM. Trends in prevalence and outcome of heart failure with preserved ejection fraction. *N Engl J Med*. 2006;355:251–9.
7. Nagueh SF, Appleton CP, Gillebert TC, Marino PN, Oh JK, Smiseth OA, Waggoner AD, Flachskampf FA, Pellikka PA, Evangelista A. Recommendations for the evaluation of left ventricular diastolic function by echocardiography. *J Am Soc Echocardiogr*. 2009;22:107–33.
8. McMurray JJ V, Adamopoulos S, Anker SD, Auricchio A, Böhm M, Dickstein K, Falk V, Filippatos G, Fonseca C, Gomez-Sanchez MA, Jaarsma T, Køber L, Lip GYH, Maggioni A Pietro, Parkhomenko A, Pieske BM, Popescu BA, Rønnevik PK, Rutten FH, Schwitzer J, Seferovic P, Stepinska J, Trindade PT, Voors AA, Zannad F, Zeiher A. ESC Guidelines for the diagnosis and treatment of acute and chronic heart failure 2012: The Task Force for the Diagnosis and Treatment of Acute and Chronic Heart Failure 2012 of the European Society of Cardiology. Developed in collaboration with the Heart. *Eur Heart J*. 2012;33:1787–847.
9. European Study Group on Diastolic Heart. How to diagnose diastolic heart failure. *Eur Heart J*. 1998;19:990–1003.
10. Edelmann F, Wachter R, Schmidt AG, Kraigher-Krainer E, Colantonio C, Kamke W, Duvinage A, Stahrenberg R, Durstewitz K, Löffler M, Düngen H-D, Tschöpe C, Herrmann-Lingen C, Halle M, Hasenfuss G, Gelbrich G, Pieske B. Effect of spironolactone on diastolic function and exercise capacity in patients with heart failure with preserved ejection fraction: the Aldo-DHF randomized controlled trial. *JAMA*. 2013;309:781–91.
11. Kim Y-H, Kim SH, Lim SY, Cho G-Y, Baik I-K, Lim H-E, Na JO, Han SW, Ko Y-H, Shin C. Relationship between depression and subclinical left ventricular changes in the general population. *Heart*. 2012;98:1378–83.
12. Ohtani T, Mohammed SF, Yamamoto K, Dunlay SM, Weston SA, Sakata Y, Rodeheffer RJ, Roger VL, Redfield MM. Diastolic stiffness as assessed by diastolic wall strain is associated with adverse remodelling and poor outcomes in heart failure with preserved ejection fraction. *Eur Heart J*. 2012;33:1742–9.

13. Naaktgeboren CA, de Groot JAH, van Smeden M, Moons KGM, Reitsma JB. Evaluating diagnostic accuracy in the face of multiple reference standards. *Ann Intern Med.* 2013;159:195–202.
14. Wallace B, Dahabreh I, Trikalinos T, Lau J, Trow P, CH S. Closing the Gap between Methodologists and End-Users: R as a Computational Back-End. *J Stat Softw.* 2012;49:1–15.
15. Hinkle DE, Wiersma W, Urs SG. *Applied Statistics for the Behavioral Sciences.* 5th Ed. Boston, MA: Houghton Mifflin; 2003.
16. Rutter CM, Gatsonis CA. A hierarchical regression approach to meta-analysis of diagnostic test accuracy evaluations. *Stat Med.* 2001;20:2865–84.

## APPENDIX 2

### Data sources and search strategy

| PubMed (total of 18791 original citations)                                            |                                                                                                                                                                                                                                                                                                                                                                                                                                                                                                                                                                                                                                                                                                                                     |
|---------------------------------------------------------------------------------------|-------------------------------------------------------------------------------------------------------------------------------------------------------------------------------------------------------------------------------------------------------------------------------------------------------------------------------------------------------------------------------------------------------------------------------------------------------------------------------------------------------------------------------------------------------------------------------------------------------------------------------------------------------------------------------------------------------------------------------------|
| Search 1                                                                              | diastol* AND (echo* OR Doppl* OR ultrasound* OR acous*). Limits: English, Journal Article, Humans. Time range: 1/1/1980 - 11/14/2013 (identified <b>12733</b> document citations).                                                                                                                                                                                                                                                                                                                                                                                                                                                                                                                                                  |
| Search 2                                                                              | diastol* AND catheter* AND Doppler* AND pressure. Limits: English, Journal Article, Humans. Time range: 1/1/1970 - 04/28/2014 (identified 738 document citations [ <b>551</b> new and 187 duplicates])                                                                                                                                                                                                                                                                                                                                                                                                                                                                                                                              |
| Search 3                                                                              | echocardiography AND tissue doppler AND catheterization. Limits: English. Time range: not specified - 02/06/2015 (identified 503 document citations [ <b>291</b> new and 212 duplicates])                                                                                                                                                                                                                                                                                                                                                                                                                                                                                                                                           |
| Search 4                                                                              | ((ventric* pressure*) OR "ventricular pressure"[MeSH Terms] OR "ventricular dysfunction"[MeSH Terms]) AND (Doppler* OR E/e* OR "echocardiography, doppler"[MeSH Terms]). Limits: English. Time range: not specified - 02/16/2015 (identified 9776 document citations [ <b>5216</b> new and 4560 duplicates]). <i>All studies of our interest, which were selected from the results of Searches 1, 2, and 3 in PubMed, were also identified in the document citations of the Search 4.</i>                                                                                                                                                                                                                                           |
| Scopus (total of 1580 original citations)                                             |                                                                                                                                                                                                                                                                                                                                                                                                                                                                                                                                                                                                                                                                                                                                     |
| Search 1                                                                              | ( TITLE-ABS-KEY ( echocardiography ) OR TITLE-ABS-KEY ( tissue Doppler ) AND TITLE-ABS-KEY ( catheterization ) AND DOCTYPE ( "ar" ) AND SUBJAREA ( mult OR agri OR bioc OR immu OR phar OR mult OR medi OR nurs OR vete OR dent OR heal ) AND ( LIMIT-TO ( LANGUAGE , "English" ) ). Time range: not specified - 02/06/2015 (identified 512 document citations [ <b>167</b> new and 345 PubMed duplicates])                                                                                                                                                                                                                                                                                                                         |
| Search 2                                                                              | ( TITLE-ABS-KEY ( ventric* pressure* ) OR TITLE-ABS-KEY ( ventricular dysfunction ) AND TITLE-ABS-KEY ( doppler* ) OR TITLE-ABS-KEY ( e/e* ) OR TITLE-ABS-KEY ( echocardiography,doppler ) ) AND SUBJAREA ( mult OR medi OR nurs OR vete OR dent OR heal ) AND NOT INDEX ( medline ) , AND ( LIMIT-TO ( LANGUAGE , "English" ) ) AND ( LIMIT-TO ( SUBJAREA , "MEDI" ) ) AND ( LIMIT-TO ( DOCTYPE , "ar" ) OR LIMIT-TO ( DOCTYPE , "cp" ) ). Time range: not specified - 02/16/2015 (identified <b>1413</b> document citations, as not indexed in Medline)                                                                                                                                                                           |
| Embase (total of 594 original citations)                                              |                                                                                                                                                                                                                                                                                                                                                                                                                                                                                                                                                                                                                                                                                                                                     |
| Search 1                                                                              | (ventric* near/2 pressure or ventric* near/3 'diastolic pressure' or ventric* near/3 'filling pressure' or 'ventricular pressure'/exp or 'ventricular pressure' or 'ventricular dysfunction'/exp or 'ventricular dysfunction' or 'diastolic heart failure'/exp or 'diastolic heart failure' or 'heart failure with normal' or 'heart failure with preserved' and ('doppler' or 'e/e' or 'echocardiography doppler'/exp or 'echocardiography doppler') and ([article]/lim or [article in press]/lim or [conference paper]/lim or [letter]/lim) and [english]/lim) and [embase]/lim) and [embase]/lim not [medline]/lim. Time range: not specified - 03/05/2015 (identified <b>594</b> document citations, as not indexed in Medline) |
| Cochrane Library (March 2015) (total of 48 original citations (conference abstracts)) |                                                                                                                                                                                                                                                                                                                                                                                                                                                                                                                                                                                                                                                                                                                                     |
| Search 1                                                                              | "filling pressure" AND "Doppler" (gives 78 citations [ <b>5</b> new and 73 duplicates])                                                                                                                                                                                                                                                                                                                                                                                                                                                                                                                                                                                                                                             |
| Search 2                                                                              | "filling pressure" AND "E/e" (gives 42 citations [ <b>6</b> new and 36 duplicates])                                                                                                                                                                                                                                                                                                                                                                                                                                                                                                                                                                                                                                                 |
| Search 3                                                                              | "diastolic dysfunction" AND "e/e" (gives 46 citations [ <b>10</b> new and 36 duplicates])                                                                                                                                                                                                                                                                                                                                                                                                                                                                                                                                                                                                                                           |
| Search 4                                                                              | "diastolic dysfunction" AND "tissue Doppler" (gives 70 citations [ <b>26</b> new and 44 duplicates])                                                                                                                                                                                                                                                                                                                                                                                                                                                                                                                                                                                                                                |
| Search 5                                                                              | "diagnostic accuracy" AND "diastolic dysfunction" (gives 3 citations [ <b>0</b> new and 3 duplicates])                                                                                                                                                                                                                                                                                                                                                                                                                                                                                                                                                                                                                              |
| Search 6                                                                              | "diagnostic accuracy" AND " diastolic heart failure" (gives 0 citations [ <b>0</b> new and 0 duplicates])                                                                                                                                                                                                                                                                                                                                                                                                                                                                                                                                                                                                                           |
| Search 7                                                                              | "diagnostic accuracy" AND "tissue doppler" (gives 6 citations [ <b>1</b> new and 5 duplicates])                                                                                                                                                                                                                                                                                                                                                                                                                                                                                                                                                                                                                                     |
| Search 8                                                                              | "diagnostic accuracy" AND "E/e" (gives 2 citations [ <b>0</b> new and 2 duplicates])                                                                                                                                                                                                                                                                                                                                                                                                                                                                                                                                                                                                                                                |



## APPENDIX 3

### TOOL FOR ASSESSMENT OF RISK OF BIAS AND APPLICABILITY

(Modified from QUADAS-2 publications listed in the end)

**PMID:**

**Title:**

**Reviewer:**

**Date:**

**Group**

**Primary/Supplemental**

**Note: Intent is to evaluate the paper to assess application for our study question (and not to critique the paper)**

#### **DOMAIN 1: PATIENT SELECTION**

##### **A. Risk of Bias**

###### *Description:*

|                              |                                                                             |                 |         |                          |
|------------------------------|-----------------------------------------------------------------------------|-----------------|---------|--------------------------|
| Study Design:                | Case-Control                                                                | Cross-Sectional | Cohort  | Randomized Control Trial |
| Data Collection              | Prospective                                                                 | Retrospective   | Unknown |                          |
| Setting of patient selection | Clinic/ Cath lab/Echo/ ER/ ICU/ In-hospital/ Out-patient/ Community/ Others |                 |         |                          |
| Clinical characterization    | complete data sheet (appendix A)                                            |                 |         |                          |

###### *Signaling Questions:*

|                                                                                          |                         |
|------------------------------------------------------------------------------------------|-------------------------|
| Was a consecutive sample of patients enrolled?                                           | Yes/No/Unclear          |
| Was a case-control design avoided?                                                       | Yes/No/Unclear          |
| Did the study avoid inappropriate exclusions? (confirmed cases of diastolic dysfunction) | Yes/No/Unclear          |
| Did the study avoid inappropriate inclusions (valvular heart disease, HCM, RCM, Afib)?   | Yes/No/Unclear          |
| Could the selection of patients have introduced bias?                                    | RISK: LOW /HIGH/UNCLEAR |

**Comments: specify why bias**

##### **B. Concerns regarding applicability**

Consider prior testing, presentation, intended use of index test and setting, severity of the target condition, demographic features, co-morbidities, preserved LVEF patients mixed with depressed LVEF patients

|                                                                              |                            |
|------------------------------------------------------------------------------|----------------------------|
| Is there concern that the included patients do not match our study question? | CONCERN: LOW /HIGH/UNCLEAR |
|------------------------------------------------------------------------------|----------------------------|

**Comments: specify why bias**

#### **DOMAIN 2: INDEX TEST: E/e' lateral/septal/mean**

##### **A. Risk of Bias**

|                                                                                                                                                                                     |                |
|-------------------------------------------------------------------------------------------------------------------------------------------------------------------------------------|----------------|
| Were the index test results interpreted without knowledge of the results of the reference standard?<br>(Yes only if specific mention of blinding/averaging of several measurements) | Yes/No/Unclear |
|-------------------------------------------------------------------------------------------------------------------------------------------------------------------------------------|----------------|

|                                                              |                                |
|--------------------------------------------------------------|--------------------------------|
| If a threshold was used, was it pre-specified?<br>applicable | Yes/No/Unclear/ Not applicable |
|--------------------------------------------------------------|--------------------------------|

|                                                                             |                         |
|-----------------------------------------------------------------------------|-------------------------|
| Could the conduct or interpretation of the index test have introduced bias? | RISK: LOW/ HIGH/UNCLEAR |
|-----------------------------------------------------------------------------|-------------------------|

**Comments: specify why bias**

**B. Concerns regarding applicability:**

Was Inter-observer Variation tested? Yes/No/Unclear  
 If tested, was Inter-observer Variation present? Yes/No/Unclear  
 Was Intra-observer Variation tested? Yes/No/Unclear  
 If tested, was Intra-observer Variation present? Yes/No/Unclear  
 Were there concerns regarding Test technology? Yes/No/Unclear  
 Were there concerns regarding Test execution? Yes/No/Unclear  
 Is there concern that the index test, its conduct, or interpretation differ from our study question? CONCERN: LOW /HIGH/UNCLEAR

**Comments: specify why bias**

**DOMAIN 3: REFERENCE STANDARD**

Circle where the study falls in the flow diagram

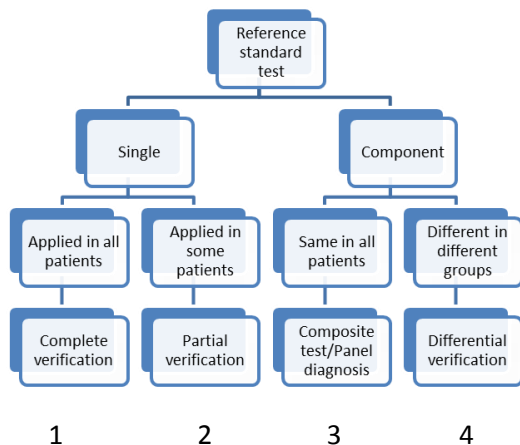

Select Reference Tests used:  
 LVEDP,  
 LVMDP,  
 LV Pre-A DP,  
 PCWP  
 Tau  
 Beta-stiffness  
 Clinical LVDD/HFpEF

**A. Risk of Bias**

Is the reference standard likely to correctly classify the target condition? Yes/No/Unclear  
 Were the reference standard results interpreted without knowledge of the results of the index test? Yes/No/Unclear  
 If 2, was there a partial verification bias? applicable Yes/No/Unclear/ Not applicable  
 Was the use of reference standard only dependent on the results of the index test? Yes/No/Unclear  
 Was reference standard not applied to a large percentage of the participants? Yes/No/Unclear  
 If 3, was composite reference standard/panel diagnosis used? Yes/No/ Not applicable  
 If 4, was there Differential Verification bias? Yes/No/ Unclear/ Not applicable  
 Was the choice of reference standard completely dependent on the results of the index test? Yes/No/Unclear  
 If the answer to the first question is no, how accurate is the inferior reference standard? Yes/No/Unclear  
 Was large percentage of the participants diagnosed by use of the inferior reference standard? Yes/No/Unclear  
 If follow-up is used as the inferior reference standard, does it identify almost all hidden cases present at the time of the index test but very few new cases that develop afterward? Does follow-up detect the same type of cases as the preferred reference standard? Yes/No/Unclear  
 Could the reference standard, its conduct, or its interpretation have introduced bias regarding our study question? RISK: LOW /HIGH/UNCLEAR

**Comments: specify why bias**

**B. Concerns regarding applicability:**

Was consistent Definition of Target Condition used? Yes/No/Unclear  
 Were there concerns regarding Test technology? Yes/No/Unclear  
 Were there concerns regarding Test execution? Yes/No/Unclear  
 Is there concern that the target condition as defined by the reference standard does not match the review question? CONCERN: LOW /HIGH/UNCLEAR

**Comments: specify why bias**

## DOMAIN 4: FLOW AND TIMING

### A. Risk of Bias

|                                                                                 |                         |
|---------------------------------------------------------------------------------|-------------------------|
| Was there an appropriate interval between index test(s) and reference standard? | Yes/No/Unclear          |
| Did all patients receive a reference standard?                                  | Yes/No/Unclear          |
| Did patients receive the same reference standard?                               | Yes/No/Unclear          |
| Were all patients included in the analysis?                                     | Yes/No/Unclear          |
| Could the patient flow have introduced bias related to our study question?      | RISK: LOW /HIGH/UNCLEAR |
| <b>Comments: specify why bias</b>                                               |                         |

### Appendix A: Data sheet

Sample Size: Overall

Sample Size for Preserved EF

What was LVEF criterion for preserved EF:

Clinical characteristics of Preserved LVEF:

| Variable                                      | Yes    |     | No | Not Quantified | Comments |
|-----------------------------------------------|--------|-----|----|----------------|----------|
|                                               | Number | (%) |    |                |          |
| Dyspnea                                       |        |     |    |                |          |
| NYHA class                                    |        |     |    |                |          |
| 6 MWD                                         |        |     |    |                |          |
| Chest Pain                                    |        |     |    |                |          |
| Exercise stress test                          |        |     |    |                |          |
| Left Ventricular Hypertrophy                  |        |     |    |                |          |
| Heart Failure                                 |        |     |    |                |          |
| BNP                                           |        |     |    |                |          |
| Ethnicity/ Race                               |        |     |    |                |          |
| Gender                                        |        |     |    |                |          |
| Age                                           |        |     |    |                |          |
| Body Habitus (weight, BSA, BMI)               |        |     |    |                |          |
| Habits (smoking, Etoh, Drugs)                 |        |     |    |                |          |
| Co morbidities                                |        |     |    |                |          |
| Hypertension                                  |        |     |    |                |          |
| Diabetes                                      |        |     |    |                |          |
| CAD                                           |        |     |    |                |          |
| CKD                                           |        |     |    |                |          |
| Sleep Apnea                                   |        |     |    |                |          |
| COPD                                          |        |     |    |                |          |
| Obesity                                       |        |     |    |                |          |
| Medications                                   |        |     |    |                |          |
| Socio Economic Status (education, salary etc) |        |     |    |                |          |

### References

1. Whiting PF et al. Quadas 2 Annals of Internal Medicine 2011, 155: 529
2. Whiting PF et al. J of clinical Epidemiology 2013, 66; 1093
3. Naaktgeboren et al. Annals of Internal Medicine 2013: 159: 195
4. Groot et al. BMJ 2011;343:d4770

## APPENDIX 4

### Full-text studies excluded with the reasons

Studies are identified with PMID (if available)

#### TEE approach:

1. 8078825
2. 9052288
3. 12356384
4. 23190400

#### LVEF not specified

5. 1905874
6. 1985353
7. 1987211
8. 2214134
9. 2278168
10. 2360494
11. 2498005
12. 2683699
13. 2782257
14. 2871286
15. 2958532
16. 3177175
17. 3209254
18. 7730680
19. 7771173
20. 7817903
21. 8319326
22. 8496538
23. 8606285
24. 8933237
25. 9046493
26. 9237029
27. 9247521
28. 10149211
29. 10969625
30. 11368862

31. 11593199
32. 11884251
33. 12487633
34. 16195393
35. 18325734
36. 24319341

#### Data available only for mixed LVEF group (extraction of data for LVpEF patients not possible)

37. 1827808
38. 7780619
39. 8736006
40. 1607511
41. 3392336
42. 8245357
43. 8557907
44. 9015003
45. 10913476
46. 10913478
47. 11279327
48. 11391284
49. 11560356
50. 11770447
51. 11926970
52. 14563593
53. 14652601
54. 15653227
55. 15891754
56. 16128376
57. 16500488
58. 16516591
59. 16682317
60. 20197576

61. 23103948
62. 18986412
63. 19168324
64. 19560662
65. 18612440
66. 18635276
67. 18771556
68. 16716013
69. 17069599
70. 17196474
71. 17451867
72. 17484986
73. 17541761
74. 17652894
75. 17658724
76. 17884382
77. 18514937
78. 18538465
79. 16682317
80. 17560894
81. 21245360
82. 22567531
83. Moladoust H. et al, Echocardiography: A Jnl. of CV Ultrasound & Allied Tech. (2009) 26 (4), 403-411
84. Said K. et al, The Egyptian Heart Journal (2012) 64, 69-74
85. 11944011
86. 19602775
87. 2816770

#### Data available only for low LVEF group

88. 7193403
89. 7960266
90. 8890820
91. 12221410
92. 17079190
93. 17484987
94. 18406665
95. 18440343
96. 20117802
97. 22494067
98. 24174962

#### No results of our interest:

99. 1760176
100. 1800031
101. 1918702
102. 2629864
103. 2816706
104. 3153793
105. 3532754
106. 3903704
107. 6777405
108. 7561012
109. 7640020
110. 7673761
111. 7802299
112. 8001095
113. 8037096
114. 8184840
115. 8252682
116. 8261053
117. 8771303
118. 8891860
119. 8904686

|      |          |      |          |      |                               |                                     |                                  |
|------|----------|------|----------|------|-------------------------------|-------------------------------------|----------------------------------|
| 120. | 9043850  | 162. | 15781734 | 204. | 16803936                      | 244.                                | 23316319                         |
| 121. | 9104907  | 163. | 15948097 | 205. | 16970713                      | 245.                                | 11796546                         |
| 122. | 9137220  | 164. | 16014646 | 206. | 24839086                      | 246.                                | 11263606                         |
| 123. | 9203493  | 165. | 16223980 | 207. | 10440167                      | 247.                                | 11263607                         |
| 124. | 9424066  | 166. | 16284230 | 208. | 11175032                      | 248.                                | 11270316                         |
| 125. | 9950969  | 167. | 16344121 | 209. | 11595603                      | 249.                                | 11585994                         |
| 126. | 10230946 | 168. | 16434758 | 210. | 12714167                      | 250.                                | 23582091                         |
| 127. | 10441218 | 169. | 16575023 | 211. | 15307890                      | 251.                                | 10636281                         |
| 128. | 10980082 | 170. | 16949491 | 212. | 16174119                      | 252.                                | 10849514                         |
| 129. | 11158951 | 171. | 17207727 | 213. | 24621836                      | 253.                                | 10910486                         |
| 130. | 11407738 | 172. | 17313636 | 214. | 24839086                      | 254.                                | 11079674                         |
| 131. | 11408426 | 173. | 17390199 | 215. | 24943993                      | <b>Patients with comorbidities</b>  |                                  |
| 132. | 11433812 | 174. | 17394966 | 216. | 24954460                      | <b>(excluded from our analysis)</b> |                                  |
| 133. | 11433813 | 175. | 17488411 | 217. | 24958524                      | 255.                                | 3280641                          |
| 134. | 11433824 | 176. | 18198205 | 218. | 25249511                      | 256.                                | 1869739                          |
| 135. | 11482709 | 177. | 18471459 | 219. | 25441329                      | 257.                                | 11121596                         |
| 136. | 11490324 | 178. | 18597919 | 220. | 25510308                      | 258.                                | 21718357                         |
| 137. | 11550110 | 179. | 19203992 | 221. | 21602549                      | 259.                                | 18636341                         |
| 138. | 11585994 | 180. | 20058507 | 222. | 23883877                      | 260.                                | 22473456                         |
| 139. | 11593203 | 181. | 20553318 | 223. | 24869961                      | 261.                                | 23555178                         |
| 140. | 11696830 | 182. | 20625213 | 224. | 24902871                      | 262.                                | 24334557                         |
| 141. | 11796872 | 183. | 20682947 | 225. | Cong T. et al, Experimental & | 263.                                | 11093099                         |
| 142. | 11809440 | 184. | 20970305 |      | Clinical Cardiology (2014) 20 | 264.                                | 22632828                         |
| 143. | 11917193 | 185. | 21262980 |      | (1), 2479-2490                | 265.                                | 23628301                         |
| 144. | 12094170 | 186. | 21316304 | 226. | 2296893                       | 266.                                | 25611697                         |
| 145. | 12707119 | 187. | 21426391 | 227. | 2672760                       | 267.                                | 23074579                         |
| 146. | 12714167 | 188. | 21683506 | 228. | 15325936                      | 268.                                | 23940422                         |
| 147. | 12766750 | 189. | 22577437 | 229. | 9247519                       | 269.                                | 24626519                         |
| 148. | 12804750 | 190. | 22705767 | 230. | 3177234                       | 270.                                | 24995376                         |
| 149. | 12848693 | 191. | 22739787 | 231. | 2360518                       | 271.                                | 25414078                         |
| 150. | 12940700 | 192. | 23146480 | 232. | 2913110                       | 272.                                | Wang W. et al, Acta Cardiol Sin  |
| 151. | 14640103 | 193. | 23194487 | 233. | 7710749                       |                                     | (2012), 28, 206-215              |
| 152. | 14641374 | 194. | 23689521 | 234. | 9385913                       | 273.                                | Ahn J. et al, e-Herz (2013), DOI |
| 153. | 14652600 | 195. | 23879336 | 235. | 11153819                      |                                     | 10.1007/s00059-013-4010-0        |
| 154. | 14670073 | 196. | 24319341 | 236. | 15389248                      | 274.                                | 21718351                         |
| 155. | 14672750 | 197. | 22066607 | 237. | 18091642                      | <b>Repetitive data</b>              |                                  |
| 156. | 14717717 | 198. | 2705380  | 238. | 20609653                      | 275.                                | 20813283                         |
| 157. | 14752488 | 199. | 9183590  | 239. | 21723693                      |                                     |                                  |
| 158. | 15172419 | 200. | 11502702 | 240. | 11179524                      |                                     |                                  |
| 159. | 15309696 | 201. | 12167386 | 241. | 15084546                      |                                     |                                  |
| 160. | 15476639 | 202. | 15979445 | 242. | 17291934                      |                                     |                                  |
| 161. | 15488086 | 203. | 16174119 | 243. | 22645191                      |                                     |                                  |

## APPENDIX 5

### Secondary analysis of E/e' correlation with LVFP

#### 5.1. Subgroup analysis for E/e' lateral and LVFP

#### E/e' lateral: Dataset for subgroup analysis (see also Tables 1 and 2)

| LVFP                                                          | r     | se    | Data       | Timing         | % HFpEF | % CAD    | % HTN    | % DM    | Indication for cath |
|---------------------------------------------------------------|-------|-------|------------|----------------|---------|----------|----------|---------|---------------------|
| <b>LVEDP</b>                                                  |       |       |            |                |         |          |          |         |                     |
| LVEDP Kidawa et al, 2005 (24)                                 | 0.58  | 0.118 | Primary    | Simultaneously | unclear | unclear  | unclear  | unclear | angiography         |
| LVEDP Manouras et al, 2013 (48) EF>55%                        | 0.33  | 0.157 | Primary    | Simultaneously | unclear | no CAD   | unclear  | unclear | angiography         |
| LVEDP Kasner et al, 2010 (37)                                 | 0.57  | 0.148 | Primary    | Simultaneously | ~60% HF | no CAD   | ~60% HTN | ~10% DM | dyspnea/angio       |
| LVEDP Previtali et al, 2012 (46)                              | 0.1   | 0.134 | Primary    | NOT Simultan.  | no HF   | unclear  | unclear  | unclear | unclear             |
| LVEDP Hadano et al, 2005 (23)                                 | 0.41  | 0.115 | Primary    | NOT Simultan.  | unclear | some CAD | unclear  | unclear | unclear             |
| LVEDP Kasner et al, 2007 (26)                                 | 0.71  | 0.097 | Primary    | NOT Simultan.  | ~80% HF | no CAD   | ~60% HTN | ~10% DM | dyspnea/angio       |
| LVEDP Özer et al, 2011 (43)                                   | 0.3   | 0.145 | Primary    | NOT Simultan.  | unclear | all CAD  | ~60% HTN | ~40% DM | angiography         |
| LVEDP Hajahmadi Poorrafsanjani et al, 2014 (50)               | 0.4   | 0.107 | Primary    | NOT Simultan.  | unclear | unclear  | unclear  | unclear | angiography         |
| LVEDP Poerner et al, 2003 (17) E/A>0.9                        | 0.33  | 0.104 | Supplement | NOT Simultan.  | unclear | unclear  | unclear  | unclear | angiography         |
| LVEDP Yesildag et al, 2011 (44)                               | 0.74  | 0.129 | Supplement | NOT Simultan.  | unclear | unclear  | unclear  | unclear | unclear             |
| <b>PCWP</b>                                                   |       |       |            |                |         |          |          |         |                     |
| PCWP Rivas-Gotz et al, 2003 (18)                              | 0.7   | 0.098 | Primary    | Simultaneously | unclear | unclear  | unclear  | unclear | ICU/Cath            |
| PCWP Maeder et al, 2011 (42)                                  | -0.04 | 0.171 | Primary    | NOT Simultan.  | ~40% HF | unclear  | unclear  | unclear | HF/PAH/volunteers   |
| PCWP Gonzalez-Vilchez et al, 2002 (16)                        | 0.54  | 0.154 | Primary    | NOT Simultan.  | unclear | unclear  | unclear  | unclear | unclear             |
| PCWP Hadano et al, 2005 (23)                                  | 0.54  | 0.106 | Primary    | NOT Simultan.  | unclear | some CAD | unclear  | unclear | unclear             |
| PCWP Nagueh et al, 1998 (14) EF>45% Sinus Tachycardia >100bpm | 0.72  | 0.101 | Supplement | Simultaneously | unclear | unclear  | unclear  | unclear | ICU/Cath lab        |
| <b>Pre-A</b>                                                  |       |       |            |                |         |          |          |         |                     |
| Pre-A Manouras et al, 2013 (48) EF>55%                        | 0.4   | 0.106 | Primary    | Simultaneously | unclear | no CAD   | unclear  | unclear | angiography         |
| Pre-A Mansencal et al, 2004 (20)                              | 0.18  | 0.232 | Primary    | NOT Simultan.  | ~10% HF | all CAD  | ~10% HTN | unclear | unclear             |
| Pre-A Previtali et al, 2012 (46)                              | 0.11  | 0.134 | Primary    | NOT Simultan.  | no HF   | unclear  | unclear  | unclear | unclear             |
| Pre-A Hsiao et al, 2011 (40)                                  | 0.23  | 0.098 | Primary    | NOT Simultan.  | unclear | all CAD  | ~70% HTN | ~50% DM | angiography         |
| Pre-A Poerner et al, 2003 (17) E/A>0.9                        | 0.49  | 0.096 | Supplement | NOT Simultan.  | unclear | unclear  | unclear  | unclear | unclear             |
| <b>LVMDP</b>                                                  |       |       |            |                |         |          |          |         |                     |
| LVMDP Ommen et al, 2000 (15)                                  | 0.4   | 0.127 | Primary    | Simultaneously | unclear | unclear  | unclear  | unclear | unclear             |

LVFP=left ventricular filling pressure; LVEDP=left ventricular end diastolic pressure; LVMDP=left ventricular mean diastolic pressure; Pre-A DP=left ventricular pre-A wave diastolic pressure; PCWP=pulmonary capillary wedge pressure; CI=confidence interval; HFpEF=heart failure with preserved Ejection Fraction; CAD=coronary artery disease; HTN=hypertension; DM=diabetes mellitus; ICU=intensive care unit. Studies are identified by the first author, year of publication, and reference number (in brackets) as cited in the main text.

### A. LVEDP (primary and supplemental data)

| Studies                                                        | Estimate (95% C.I.)         |
|----------------------------------------------------------------|-----------------------------|
| Hadano et al, 2005 (23)                                        | 0.410 (0.185, 0.635)        |
| Kidawa et al, 2005 (24)                                        | 0.580 (0.350, 0.810)        |
| Previtali et al, 2012 (46)                                     | 0.100 (-0.163, 0.363)       |
| Hajahmadi Poorrafsanjani et al, 2014 (50)                      | 0.400 (0.191, 0.609)        |
| Kasner et al, 2010 (37)                                        | 0.570 (0.281, 0.859)        |
| Manouras et al, 2013 (48) EF>55%                               | 0.330 (0.022, 0.638)        |
| Kasner et al, 2007 (26)                                        | 0.710 (0.520, 0.900)        |
| Özer et al, 2011 (43)                                          | 0.300 (0.015, 0.585)        |
| <b>Subgroup Primary (I<sup>2</sup>=60.84 % , P=0.013)</b>      | <b>0.436 (0.298, 0.574)</b> |
| Poerner et al, 2003 (17) E/A>0.9                               | 0.330 (0.127, 0.533)        |
| Yesildag et al, 2011 (44)                                      | 0.740 (0.486, 0.994)        |
| <b>Subgroup Supplemental (I<sup>2</sup>=83.65 % , P=0.013)</b> | <b>0.528 (0.126, 0.929)</b> |
| <b>Overall (I<sup>2</sup>=62.68 % , P=0.004)</b>               | <b>0.453 (0.329, 0.578)</b> |

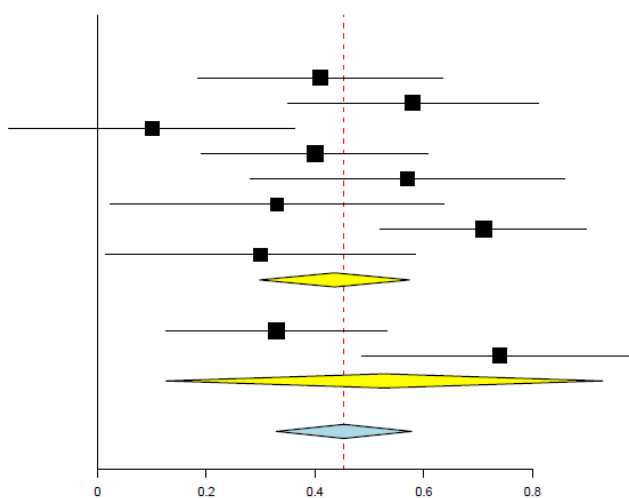

### B. LVEDP (simultaneous and NOT simultaneous)

| Studies                                                              | Estimate (95% C.I.)         |
|----------------------------------------------------------------------|-----------------------------|
| Kidawa et al, 2005 (24)                                              | 0.580 (0.350, 0.810)        |
| Kasner et al, 2010 (37)                                              | 0.570 (0.281, 0.859)        |
| Manouras et al, 2013 (48) EF>55%                                     | 0.330 (0.022, 0.638)        |
| <b>Subgroup Simultaneously (I<sup>2</sup>=0 % , P=0.400)</b>         | <b>0.513 (0.358, 0.669)</b> |
| Previtali et al, 2012 (46)                                           | 0.100 (-0.163, 0.363)       |
| Kasner et al, 2007 (26)                                              | 0.710 (0.520, 0.900)        |
| Hadano et al, 2005 (23)                                              | 0.410 (0.185, 0.635)        |
| Poerner et al, 2003 (17) E/A>0.9                                     | 0.330 (0.127, 0.533)        |
| Yesildag et al, 2011 (44)                                            | 0.740 (0.486, 0.994)        |
| Hajahmadi Poorrafsanjani et al, 2014 (50)                            | 0.400 (0.191, 0.609)        |
| Özer et al, 2011 (43)                                                | 0.300 (0.015, 0.585)        |
| <b>Subgroup NOT Simultaneously (I<sup>2</sup>=72.47 % , P=0.001)</b> | <b>0.434 (0.269, 0.598)</b> |
| <b>Overall (I<sup>2</sup>=62.68 % , P=0.004)</b>                     | <b>0.453 (0.329, 0.578)</b> |

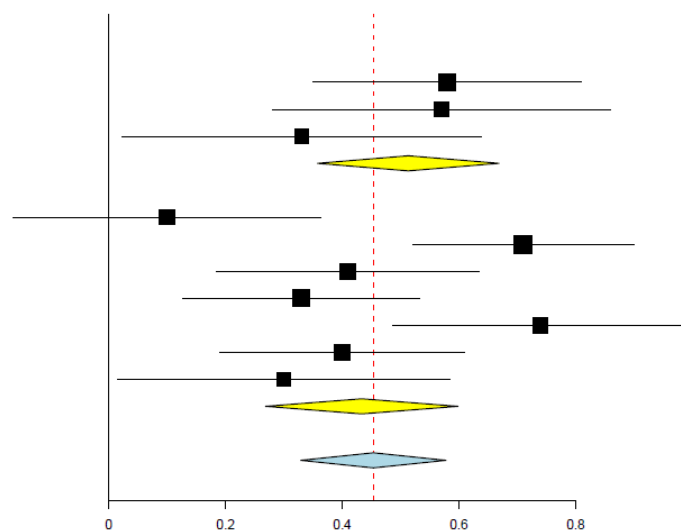

### C. PCWP (primary and supplemental data)

| Studies                                                   | Estimate (95% C.I.)         |
|-----------------------------------------------------------|-----------------------------|
| Rivas-Gotz et al, 2003 (18)                               | 0.700 (0.508, 0.892)        |
| Maeder et al, 2011 (42)                                   | -0.040 (-0.376, 0.296)      |
| Gonzalez-Vilchez et al, 2002 (16)                         | 0.540 (0.239, 0.841)        |
| Hadano et al, 2005 (23)                                   | 0.540 (0.332, 0.748)        |
| <b>Subgroup Primary (I<sup>2</sup>=78.69 % , P=0.003)</b> | <b>0.459 (0.188, 0.730)</b> |
| Nagueh et al, 1998 (14)                                   | 0.720 (0.522, 0.918)        |
| <b>Subgroup Supplemental (I<sup>2</sup>=NA , P=NA)</b>    | <b>0.720 (0.522, 0.918)</b> |
| <b>Overall (I<sup>2</sup>=76.06 % , P=0.002)</b>          | <b>0.520 (0.304, 0.737)</b> |

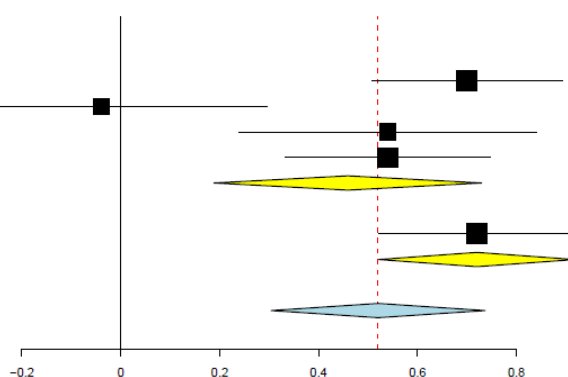

Heterogeneity amongst the studies was estimated by I<sup>2</sup> statistic. Studies are identified by the first author, year of publication, and reference number (in brackets) as cited in the main text. OpenMetaAnalyst software (12) for Windows (64-bit version) was used for statistical analysis including graphical presentations of forest plots.

### D. PCWP (simultaneous and NOT simultaneous)

| Studies                                                              | Estimate (95% C.I.)         |
|----------------------------------------------------------------------|-----------------------------|
| Rivas-Gotz et al, 2003 (18)                                          | 0.700 (0.508, 0.892)        |
| Nagueh et al, 1998 (14)                                              | 0.720 (0.522, 0.918)        |
| <b>Subgroup Simultaneously (I<sup>2</sup>=0 % , P=0.887)</b>         | <b>0.710 (0.572, 0.848)</b> |
| Maeder et al, 2011 (42)                                              | -0.040 (-0.376, 0.296)      |
| Gonzalez-Vilchez et al, 2002 (16)                                    | 0.540 (0.239, 0.841)        |
| Hadano et al, 2005 (23)                                              | 0.540 (0.332, 0.748)        |
| <b>Subgroup NOT Simultaneously (I<sup>2</sup>=78.01 % , P=0.011)</b> | <b>0.363 (0.020, 0.706)</b> |
| <b>Overall (I<sup>2</sup>=76.06 % , P=0.002)</b>                     | <b>0.520 (0.304, 0.737)</b> |

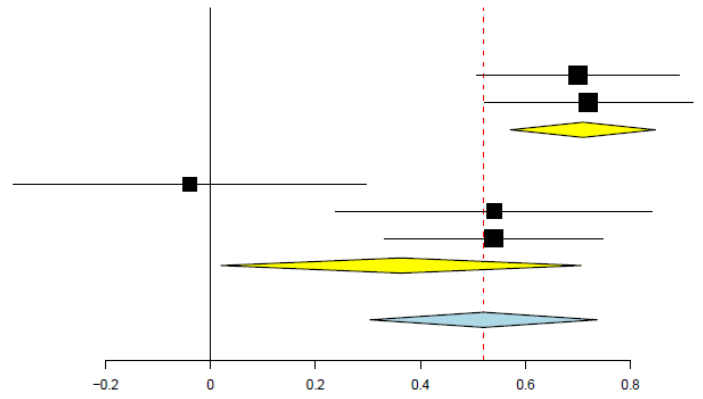

### E. Pre-A (primary and supplemental data)

| Studies                                                | Estimate (95% C.I.)         |
|--------------------------------------------------------|-----------------------------|
| Previtali et al, 2012 (46)                             | 0.110 (-0.153, 0.373)       |
| Manouras et al, 2013 (48) EF>55%                       | 0.400 (0.100, 0.700)        |
| Mansencal et al, 2004 (20)                             | 0.180 (-0.274, 0.634)       |
| Hsiao et al, 2011 (40)                                 | 0.230 (0.037, 0.423)        |
| <b>Subgroup Primary (I<sup>2</sup>=0 % , P=0.556)</b>  | <b>0.228 (0.096, 0.360)</b> |
| Poerner et al, 2003 (17) E/A>0.9                       | 0.490 (0.302, 0.678)        |
| <b>Subgroup Supplemental (I<sup>2</sup>=NA , P=NA)</b> | <b>0.490 (0.302, 0.678)</b> |
| <b>Overall (I<sup>2</sup>=43.5 % , P=0.132)</b>        | <b>0.302 (0.150, 0.454)</b> |

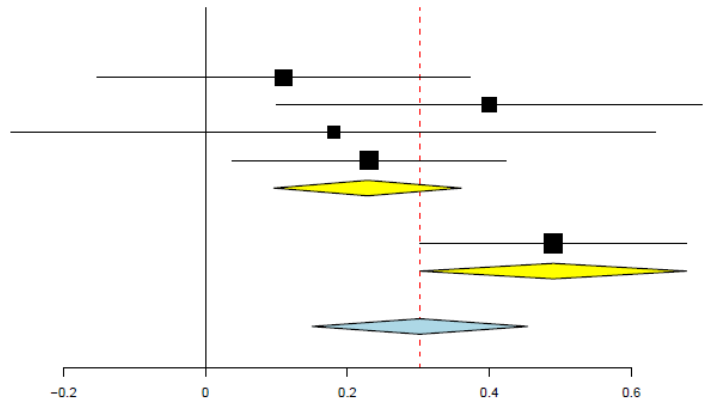

### F. Pre-A (simultaneous and NOT simultaneous)

| Studies                                                             | Estimate (95% C.I.)         |
|---------------------------------------------------------------------|-----------------------------|
| Manouras et al, 2013 (48) EF>55%                                    | 0.400 (0.100, 0.700)        |
| <b>Subgroup Simultaneously (I<sup>2</sup>=NA , P=NA)</b>            | <b>0.400 (0.100, 0.700)</b> |
| Previtali et al, 2012 (46)                                          | 0.110 (-0.153, 0.373)       |
| Mansencal et al, 2004 (20)                                          | 0.180 (-0.274, 0.634)       |
| Hsiao et al, 2011 (40)                                              | 0.230 (0.037, 0.423)        |
| Poerner et al, 2003 (17) E/A>0.9                                    | 0.490 (0.302, 0.678)        |
| <b>Subgroup NOT Simultaneously (I<sup>2</sup>=55.4 % , P=0.081)</b> | <b>0.278 (0.092, 0.464)</b> |
| <b>Overall (I<sup>2</sup>=43.5 % , P=0.132)</b>                     | <b>0.302 (0.150, 0.454)</b> |

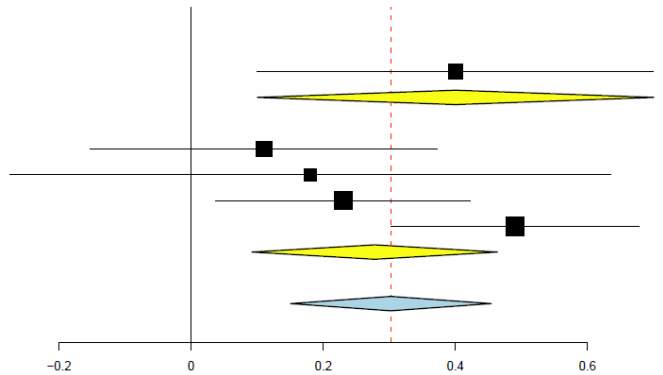



## SUBGPOUP ANALYSIS for COMBINED LVFP and $E/e'_{\text{lateral}}$

For combined LVFP analysis, if the study measured two LVFP parameters we chose one that had the highest correlation coefficient.

### G. $E/e'_{\text{lateral}}$ : combined LVFP – (primary and supplemental data)

| Studies                                                        | Estimate (95% C.I.)         |
|----------------------------------------------------------------|-----------------------------|
| LVMDP Ommen et al, 2000 (15)                                   | 0.400 (0.180, 0.620)        |
| LVEDP Kidawa et al, 2005 (24)                                  | 0.580 (0.349, 0.811)        |
| LVEDP Kasner et al, 2010 (37)                                  | 0.570 (0.280, 0.860)        |
| PCWP Rivas-Gotz et al, 2003 (18)                               | 0.700 (0.508, 0.892)        |
| Pre-A Manouras et al, 2013 (48) EF>55%                         | 0.400 (0.192, 0.608)        |
| LVEDP Özer et al, 2011 (43)                                    | 0.300 (0.016, 0.584)        |
| Pre-A Mansencal et al, 2004 (20)                               | 0.180 (-0.275, 0.635)       |
| LVEDP Hajahmadi Poorrafsanjani et al, 2014 (50)                | 0.400 (0.190, 0.610)        |
| PCWP Maeder et al, 2011 (42)                                   | -0.040 (-0.375, 0.295)      |
| PCWP Gonzalez-Vilchez et al, 2002 (16)                         | 0.540 (0.238, 0.842)        |
| Pre-A Previtali et al, 2012 (46)                               | 0.110 (-0.153, 0.373)       |
| LVEDP Kasner et al, 2007 (26)                                  | 0.710 (0.520, 0.900)        |
| PCWP Hadano et al, 2005 (23)                                   | 0.540 (0.332, 0.748)        |
| <b>Subgroup Primary (I<sup>2</sup>=64.6 % , P=0.001)</b>       | <b>0.440 (0.325, 0.555)</b> |
| PCWP Nagueh et al, 1998 (14) EF>45% Sinus Tachycardia >100bpm  | 0.720 (0.522, 0.918)        |
| Pre-A Poerner et al, 2003 (17) E/A>0.9                         | 0.490 (0.302, 0.678)        |
| LVEDP Yesildag et al, 2011 (44) EF>~40%                        | 0.740 (0.487, 0.993)        |
| <b>Subgroup Supplemental (I<sup>2</sup>=45.17 % , P=0.161)</b> | <b>0.639 (0.475, 0.803)</b> |
| <b>Overall (I<sup>2</sup>=64.84 % , P=0.000)</b>               | <b>0.483 (0.382, 0.583)</b> |

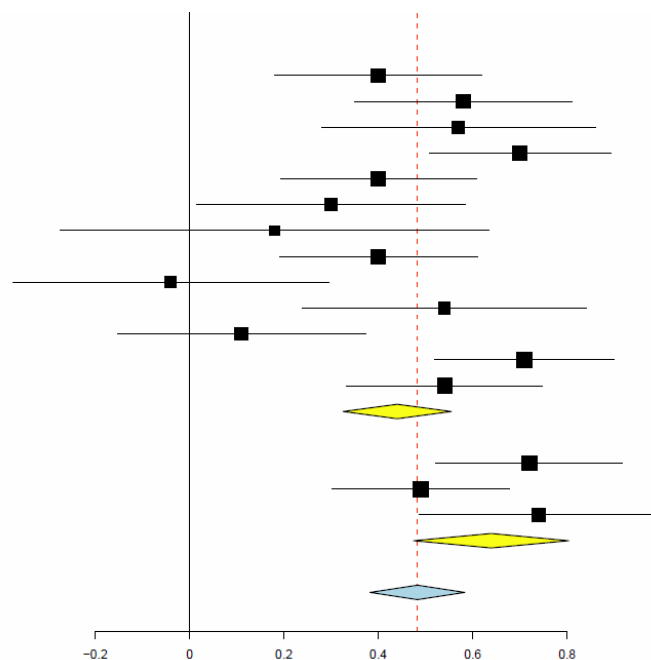

### H. $E/e'_{\text{lateral}}$ : combined LVFP – (simultaneous and NOT simultaneous)

| Studies                                                              | Estimate (95% C.I.)         |
|----------------------------------------------------------------------|-----------------------------|
| LVMDP Ommen et al, 2000 (15)                                         | 0.400 (0.180, 0.620)        |
| LVEDP Kidawa et al, 2005 (24)                                        | 0.580 (0.349, 0.811)        |
| LVEDP Kasner et al, 2010 (37)                                        | 0.570 (0.280, 0.860)        |
| PCWP Nagueh et al, 1998 (14) EF>45% Sinus Tachycardia >100bpm        | 0.720 (0.522, 0.918)        |
| PCWP Rivas-Gotz et al, 2003 (18)                                     | 0.700 (0.508, 0.892)        |
| Pre-A Manouras et al, 2013 (48) EF>55%                               | 0.400 (0.192, 0.608)        |
| <b>Subgroup Simultaneously (I<sup>2</sup>=43.49 % , P=0.115)</b>     | <b>0.566 (0.447, 0.685)</b> |
| LVEDP Özer et al, 2011 (43)                                          | 0.300 (0.016, 0.584)        |
| Pre-A Mansencal et al, 2004 (20)                                     | 0.180 (-0.275, 0.635)       |
| LVEDP Hajahmadi Poorrafsanjani et al, 2014 (50)                      | 0.400 (0.190, 0.610)        |
| PCWP Maeder et al, 2011 (42)                                         | -0.040 (-0.375, 0.295)      |
| Pre-A Poerner et al, 2003 (17) E/A>0.9                               | 0.490 (0.302, 0.678)        |
| PCWP Gonzalez-Vilchez et al, 2002 (16)                               | 0.540 (0.238, 0.842)        |
| Pre-A Previtali et al, 2012 (46)                                     | 0.110 (-0.153, 0.373)       |
| LVEDP Yesildag et al, 2011 (44) EF>~40%                              | 0.740 (0.487, 0.993)        |
| LVEDP Kasner et al, 2007 (26)                                        | 0.710 (0.520, 0.900)        |
| PCWP Hadano et al, 2005 (23)                                         | 0.540 (0.332, 0.748)        |
| <b>Subgroup NOT Simultaneously (I<sup>2</sup>=70.63 % , P=0.000)</b> | <b>0.422 (0.276, 0.569)</b> |
| <b>Overall (I<sup>2</sup>=64.84 % , P=0.000)</b>                     | <b>0.483 (0.382, 0.583)</b> |

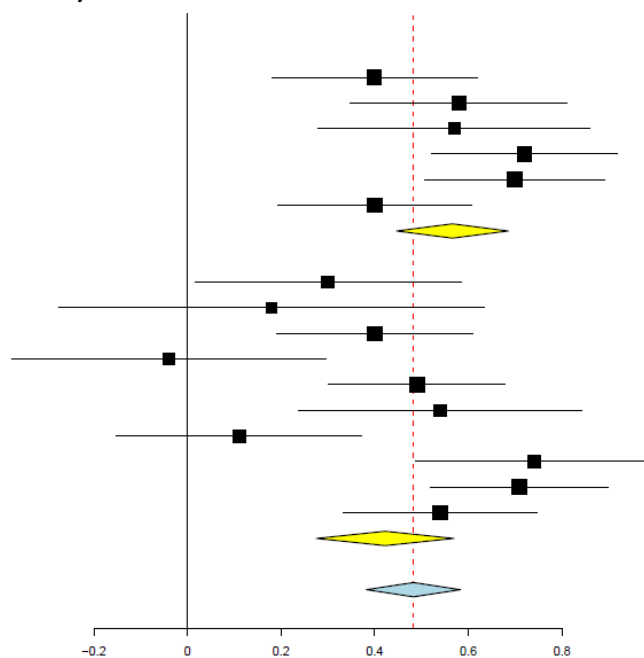

### I. $E/e'_{\text{lateral}}$ : combined LVFP – (HFpEF prevalence)

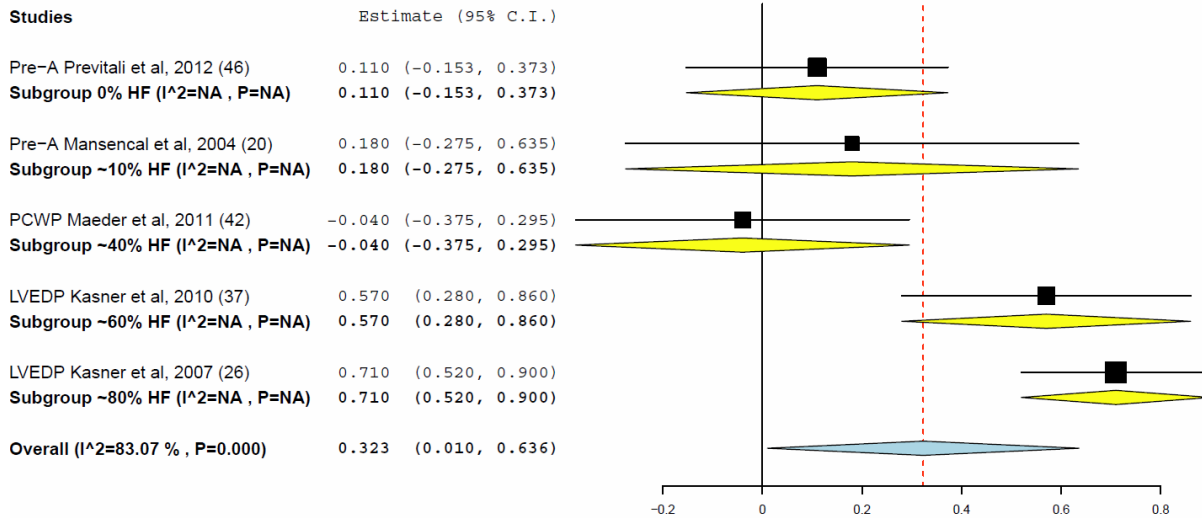

### J. $E/e'_{\text{lateral}}$ : combined LVFP – (CAD prevalence)

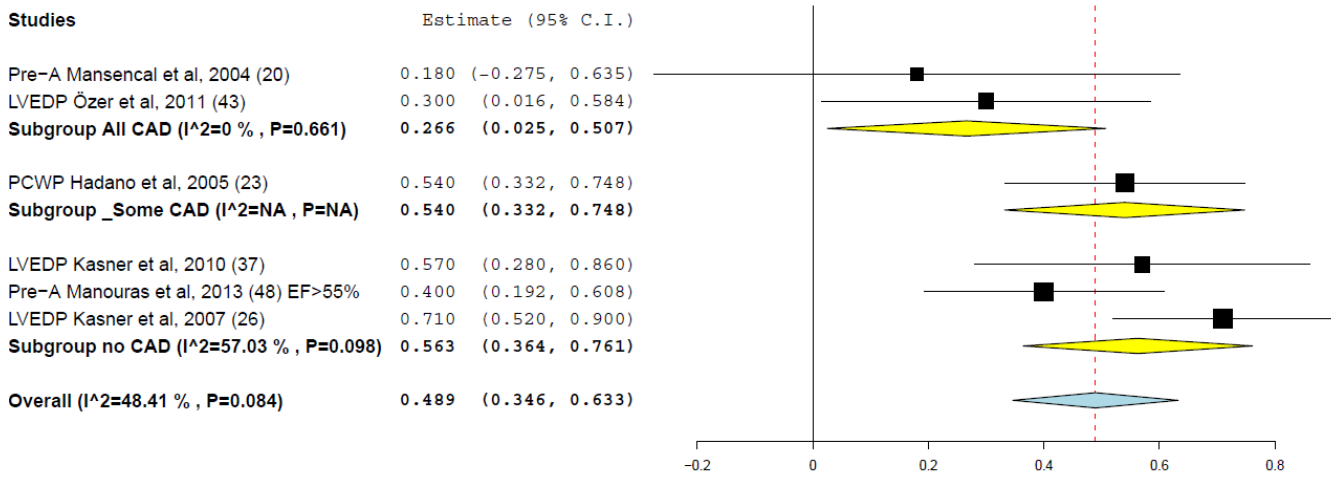

### K. $E/e'_{\text{lateral}}$ : Primary data variables measured simultaneously (shown as table 4B in the main text)

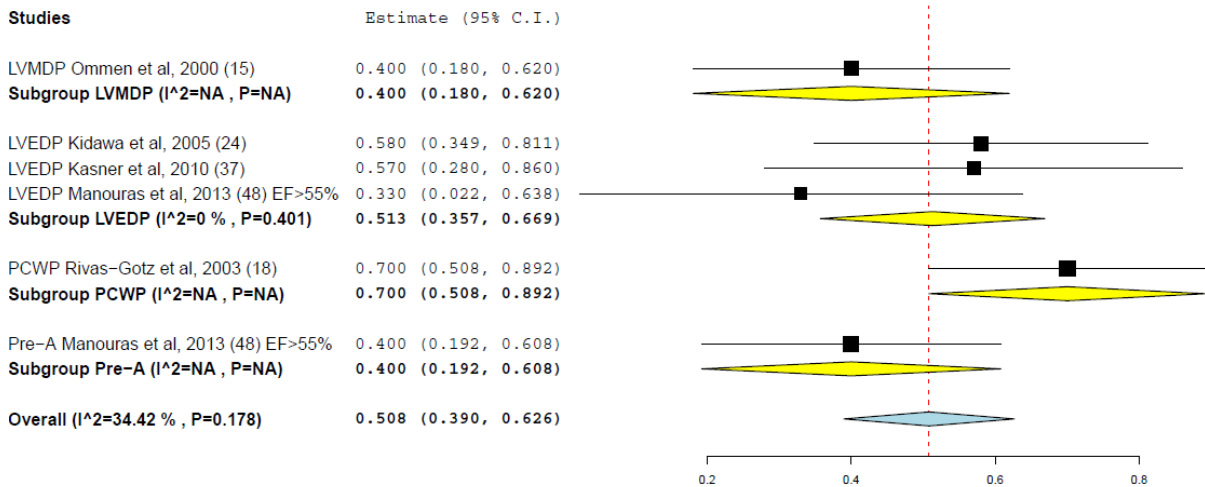

## 5.2. Subgroup analysis for $E/e'_{\text{septal}}$ and LVFP

### $E/e'_{\text{septal}}$ : Dataset for subgroup analysis (see also Tables 1 and 2)

| LVFP                                       | <i>r</i> | se    | Data      | Timing         | % HFpEF | % CAD    | % HTN    | % DM    | Indication for cath |
|--------------------------------------------|----------|-------|-----------|----------------|---------|----------|----------|---------|---------------------|
| <b>LVEDP</b>                               |          |       |           |                |         |          |          |         |                     |
| LVEDP Manouras et al, 2013 (48) EF>55%     | 0.03     | 0.167 | Primary   | Simultaneously | unclear | no CAD   | unclear  | unclear | angiography         |
| LVEDP Kidawa et al, 2005 (24)              | 0.29     | 0.138 | Primary   | Simultaneously | unclear | unclear  | unclear  | unclear | angiography         |
| LVEDP Previtali et al, 2012 (46)           | 0.22     | 0.132 | Primary   | NOT Simultan.  | no HF   | unclear  | unclear  | unclear | unclear             |
| LVEDP Özer et al, 2011 (43)                | 0.54     | 0.128 | Primary   | NOT Simultan.  | unclear | all CAD  | ~60% HTN | ~40% DM | angiography         |
| LVEDP Poerner et al, 2003 (17) E/A>0.9     | 0.39     | 0.101 | Supplemer | NOT Simultan.  | unclear | unclear  | unclear  | unclear | angiography         |
| LVEDP Yesildag et al, 2011 (44) EF> ~40%   | 0.73     | 0.132 | Supplemer | NOT Simultan.  | unclear | unclear  | unclear  | unclear | unclear             |
| LVEDP Min et al, 2007 (27) $8 < E/e' < 15$ | 0.03     | 0.137 | Supplemer | Simultaneously | unclear | some CAD | ~50% HTN | ~30% DM | unclear             |
| <b>PCWP</b>                                |          |       |           |                |         |          |          |         |                     |
| PCWP Rivas-Gotz et al, 2003 (18)           | 0.55     | 0.115 | Primary   | Simultaneously | unclear | unclear  | unclear  | unclear | ICU/Cath lab        |
| PCWP Maeder et al, 2011 (42)               | 0.23     | 0.167 | Primary   | NOT Simultan.  | ~40% HF | unclear  | unclear  | unclear | HF/PAH/volunteers   |
| PCWP Tatsumi et al, 2014 (51)              | 0.64     | 0.172 | Primary   | NOT Simultan.  | unclear | unclear  | unclear  | unclear | unclear             |
| <b>Pre-A</b>                               |          |       |           |                |         |          |          |         |                     |
| Pre-A Manouras et al, 2013 (48) EF>55%     | 0.02     | 0.161 | Primary   | Simultaneously | unclear | no CAD   | unclear  | unclear | angiography         |
| Pre-A Previtali et al, 2012 (46)           | 0.28     | 0.129 | Primary   | NOT Simultan.  | no HF   | unclear  | unclear  | unclear | unclear             |
| Pre-A Hsiao et al, 2011 (40)               | 0.31     | 0.096 | Primary   | NOT Simultan.  | unclear | all CAD  | ~70% HTN | ~50% DM | angiography         |
| Pre-A Poerner et al, 2003 (17) E/A>0.9     | 0.4      | 0.101 | Supplemer | NOT Simultan.  | unclear | unclear  | unclear  | unclear | unclear             |
| <b>LVMDP</b>                               |          |       |           |                |         |          |          |         |                     |
| LVMDP Ommen et al, 2000 (15)               | 0.47     | 0.112 | Primary   | Simultaneously | unclear | unclear  | unclear  | unclear | unclear             |
| LVMDP Rudko et al, 2008 (32)               | 0.47     | 0.145 | Primary   | Simultaneously | ~20% HF | ~80% CAD | ~50% HTN | unclear | unclear             |

LVFP=left ventricular filling pressure; LVEDP=left ventricular end diastolic pressure; LVMDP=left ventricular mean diastolic pressure; Pre-A DP=left ventricular pre-A wave diastolic pressure; PCWP=pulmonary capillary wedge pressure; CI=confidence interval; HFpEF=heart failure with preserved Ejection Fraction; CAD=coronary artery disease; HTN=hypertension; DM=diabetes mellitus; ICU=intensive care unit. Studies are identified by the first author, year of publication, and reference number (in brackets) as cited in the main text.

### A. LVEDP (primary and supplemental data)

| Studies                                                        | Estimate (95% C.I.)         |
|----------------------------------------------------------------|-----------------------------|
| Previtali et al, 2012 (46)                                     | 0.220 (-0.038, 0.478)       |
| Özer et al, 2011 (43)                                          | 0.540 (0.289, 0.791)        |
| Manouras et al, 2013 (48) EF>55%                               | 0.030 (-0.297, 0.357)       |
| Kidawa et al, 2005 (24)                                        | 0.290 (0.020, 0.560)        |
| <b>Subgroup Primary (I<sup>2</sup>=53.97 % , P=0.089)</b>      | <b>0.285 (0.082, 0.487)</b> |
| Min et al, 2007 (27) 8<E/e'<15                                 | 0.030 (-0.239, 0.299)       |
| Poerner et al, 2003 (17) E/A>0.9                               | 0.390 (0.192, 0.588)        |
| Yesildag et al, 2011 (44)                                      | 0.730 (0.472, 0.988)        |
| <b>Subgroup Supplemental (I<sup>2</sup>=85.25 % , P=0.001)</b> | <b>0.385 (0.024, 0.746)</b> |
| <b>Overall (I<sup>2</sup>=71.41 % , P=0.002)</b>               | <b>0.328 (0.146, 0.510)</b> |

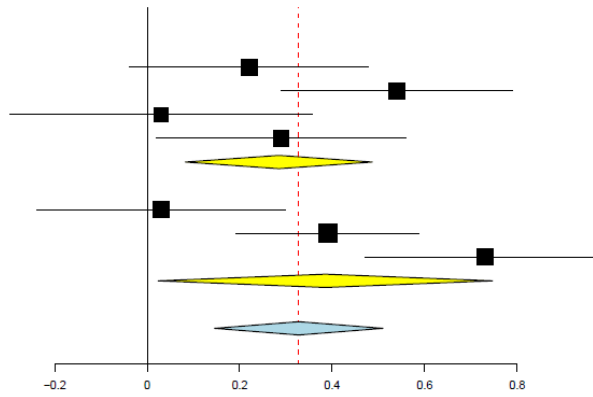

### B. LVEDP (simultaneous and NOT Simultaneous)

| Studies                                                              | Estimate (95% C.I.)          |
|----------------------------------------------------------------------|------------------------------|
| Manouras et al, 2013 (48) EF>55%                                     | 0.030 (-0.297, 0.357)        |
| Kidawa et al, 2005 (24)                                              | 0.290 (0.020, 0.560)         |
| Min et al, 2007 (27) 8<E/e'<15                                       | 0.030 (-0.239, 0.299)        |
| <b>Subgroup Simultaneously (I<sup>2</sup>=10.44 % , P=0.327)</b>     | <b>0.126 (-0.049, 0.300)</b> |
| Poerner et al, 2003 (17) E/A>0.9                                     | 0.390 (0.192, 0.588)         |
| Özer et al, 2011 (43)                                                | 0.540 (0.289, 0.791)         |
| Yesildag et al, 2011 (44)                                            | 0.730 (0.472, 0.988)         |
| Previtali et al, 2012 (46)                                           | 0.220 (-0.038, 0.478)        |
| <b>Subgroup NOT Simultaneously (I<sup>2</sup>=64.34 % , P=0.038)</b> | <b>0.467 (0.266, 0.667)</b>  |
| <b>Overall (I<sup>2</sup>=71.41 % , P=0.002)</b>                     | <b>0.328 (0.146, 0.510)</b>  |

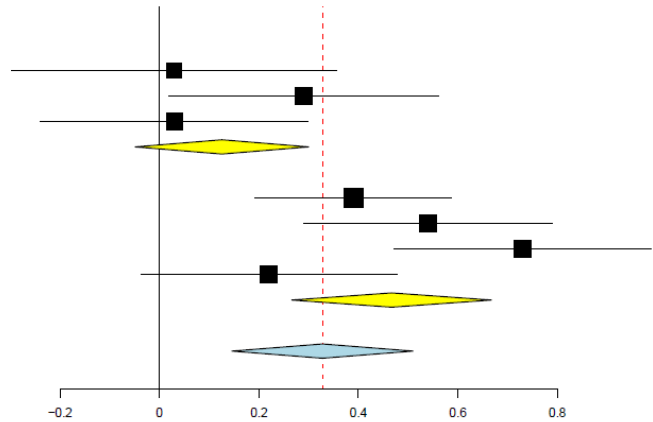

### C. PCWP (primary and supplemental data)

| Studies                                                   | Estimate (95% C.I.)         |
|-----------------------------------------------------------|-----------------------------|
| Rivas-Gotz et al, 2003 (18)                               | 0.550 (0.325, 0.775)        |
| Maeder et al, 2011 (42)                                   | 0.230 (-0.097, 0.557)       |
| Tatsumi et al, 2014 (51)                                  | 0.640 (0.303, 0.977)        |
| <b>Subgroup Primary (I<sup>2</sup>=42.23 % , P=0.177)</b> | <b>0.483 (0.261, 0.704)</b> |
| <b>Overall (I<sup>2</sup>=42.23 % , P=0.177)</b>          | <b>0.483 (0.261, 0.704)</b> |

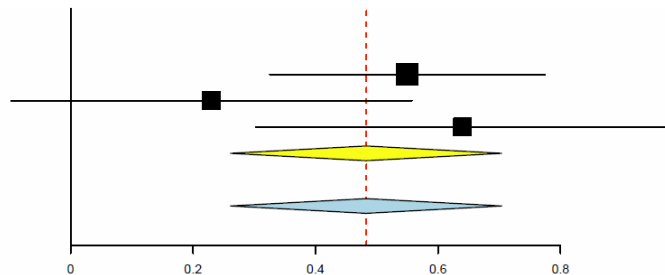

### D. PCWP (simultaneous and NOT simultaneous)

| Studies                                                              | Estimate (95% C.I.)         |
|----------------------------------------------------------------------|-----------------------------|
| Rivas-Gotz et al, 2003 (18)                                          | 0.550 (0.325, 0.775)        |
| <b>Subgroup Simultaneously (I<sup>2</sup>=NA , P=NA)</b>             | <b>0.550 (0.325, 0.775)</b> |
| Maeder et al, 2011 (42)                                              | 0.230 (-0.097, 0.557)       |
| Tatsumi et al, 2014 (51)                                             | 0.640 (0.303, 0.977)        |
| <b>Subgroup NOT Simultaneously (I<sup>2</sup>=65.87 % , P=0.087)</b> | <b>0.433 (0.031, 0.835)</b> |
| <b>Overall (I<sup>2</sup>=42.23 % , P=0.177)</b>                     | <b>0.483 (0.261, 0.704)</b> |

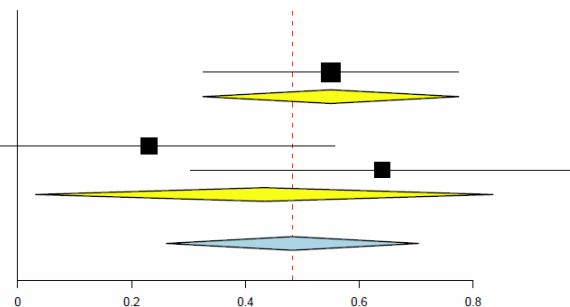

Heterogeneity amongst the studies was estimated by I<sup>2</sup> statistic. Studies are identified by the first author, year of publication, and reference number (in brackets) as cited in the main text. OpenMetaAnalyst software (12) for Windows (64-bit version) was used for statistical analysis including graphical presentations of forest plots.

### E. Pre-A (primary and supplemental data)

| Studies                                                  | Estimate (95% C.I.)         |
|----------------------------------------------------------|-----------------------------|
| Hsiao et al, 2011 (40)                                   | 0.310 (0.122, 0.498)        |
| Previtali et al, 2012 (46)                               | 0.280 (0.026, 0.534)        |
| Manouras et al, 2013 (48) EF>55%                         | 0.020 (-0.296, 0.336)       |
| <b>Subgroup Primary (I<sup>2</sup>=19.47% , P=0.289)</b> | <b>0.239 (0.084, 0.395)</b> |
| Poerner et al, 2003 (17)                                 | 0.400 (0.203, 0.597)        |
| <b>Subgroup Supplemental (I<sup>2</sup>=NA , P=NA)</b>   | <b>0.400 (0.203, 0.597)</b> |
| <b>Overall (I<sup>2</sup>=25.82% , P=0.257)</b>          | <b>0.288 (0.155, 0.421)</b> |

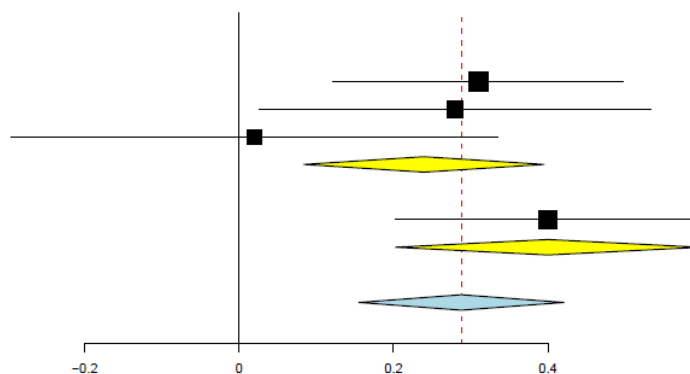

### F. Pre-A (simultaneous and NOT simultaneous)

| Studies                                                         | Estimate (95% C.I.)          |
|-----------------------------------------------------------------|------------------------------|
| Manouras et al, 2013 (48) EF>55%                                | 0.020 (-0.296, 0.336)        |
| <b>Subgroup Simultaneously (I<sup>2</sup>=NA , P=NA)</b>        | <b>0.020 (-0.296, 0.336)</b> |
| Hsiao et al, 2011 (40)                                          | 0.310 (0.122, 0.498)         |
| Previtali et al, 2012 (46)                                      | 0.280 (0.026, 0.534)         |
| Poerner et al, 2003 (17) E/A>0.9                                | 0.400 (0.203, 0.597)         |
| <b>Subgroup NOT Simultaneously (I<sup>2</sup>=0% , P=0.717)</b> | <b>0.337 (0.217, 0.457)</b>  |
| <b>Overall (I<sup>2</sup>=25.82% , P=0.257)</b>                 | <b>0.288 (0.155, 0.421)</b>  |

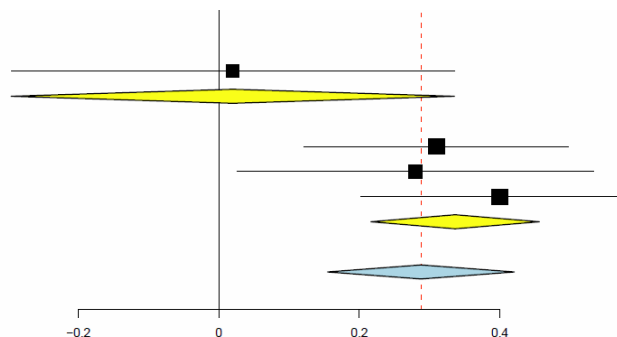

## SUBGPOUP ANALYSIS for COMBINED LVFP and E/e'<sub>septal</sub>

For combined LVFP analysis, if the study measured two LVFP parameters we chose that had the highest correlation coefficient.

### G. E/e'<sub>septal</sub>: combined LVFP (primary and supplemental data)

| Studies                                                       | Estimate (95% C.I.)         |
|---------------------------------------------------------------|-----------------------------|
| LVEDP Özer et al, 2011 (43)                                   | 0.540 (0.289, 0.791)        |
| LVEDP Manouras et al, 2013 (48) EF>55%                        | 0.030 (-0.297, 0.357)       |
| Pre-A Previtali et al, 2012 (46)                              | 0.280 (0.027, 0.533)        |
| LVEDP Kidawa et al, 2005 (24)                                 | 0.290 (0.020, 0.560)        |
| LVMDP Ommen et al, 2000 (15)                                  | 0.470 (0.250, 0.690)        |
| PCWP Maeder et al, 2011 (42)                                  | 0.230 (-0.097, 0.557)       |
| PCWP Tatsumi et al, 2014 (51)                                 | 0.640 (0.303, 0.977)        |
| PCWP Rivas-Gotz et al, 2003 (18)                              | 0.550 (0.325, 0.775)        |
| Pre-A Hsiao et al, 2011 (40)                                  | 0.310 (0.122, 0.498)        |
| LVMDP Rudko et al, 2008 (32)                                  | 0.470 (0.186, 0.754)        |
| <b>Subgroup Primary (I<sup>2</sup>=34.53% , P=0.132)</b>      | <b>0.389 (0.287, 0.490)</b> |
| LVEDP Yesildag et al, 2011 (44) EF>~40%                       | 0.730 (0.471, 0.989)        |
| Pre-A Poerner et al, 2003 (17) E/A>0.9                        | 0.400 (0.202, 0.598)        |
| LVEDP Min et al, 2007 (27) 8<E/e'<15                          | 0.030 (-0.239, 0.299)       |
| <b>Subgroup Supplemental (I<sup>2</sup>=85.23% , P=0.001)</b> | <b>0.388 (0.027, 0.750)</b> |
| <b>Overall (I<sup>2</sup>=56.03% , P=0.007)</b>               | <b>0.388 (0.281, 0.495)</b> |

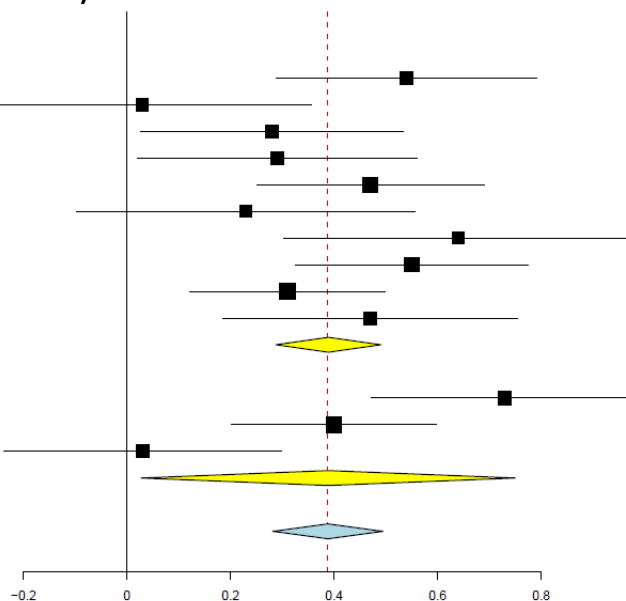

### H. $E/e'_{\text{septal}}$ : combined LVFP (simultaneous and NOT simultaneous)

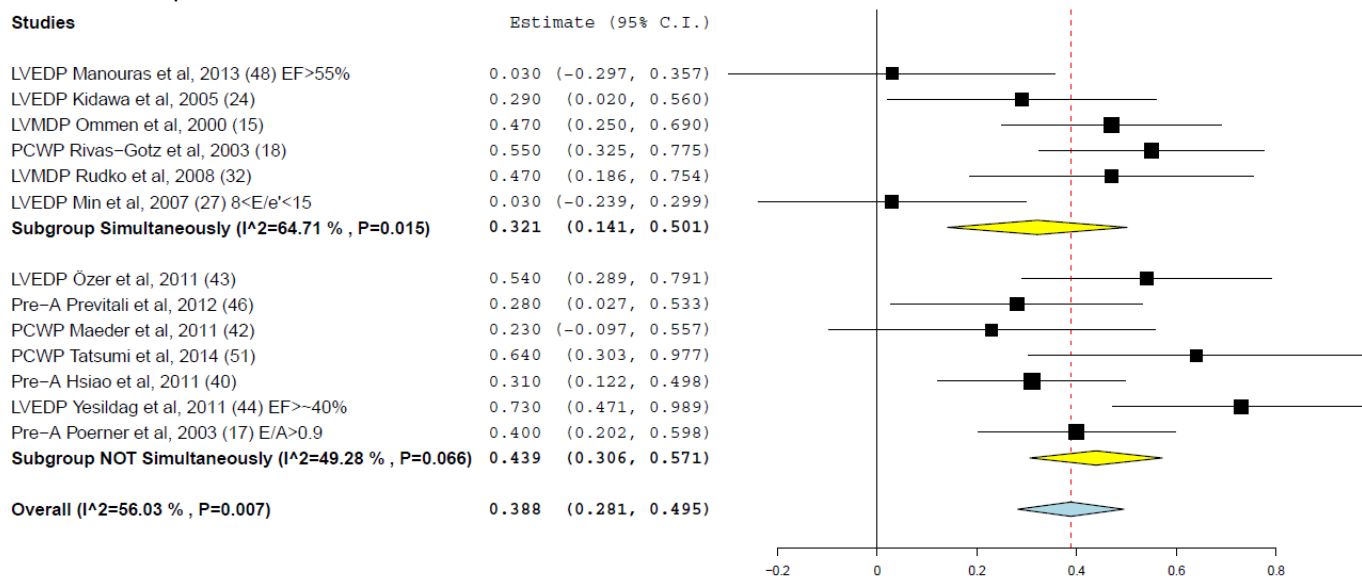

### I. $E/e'_{\text{septal}}$ : combined LVFP (CAD prevalence)

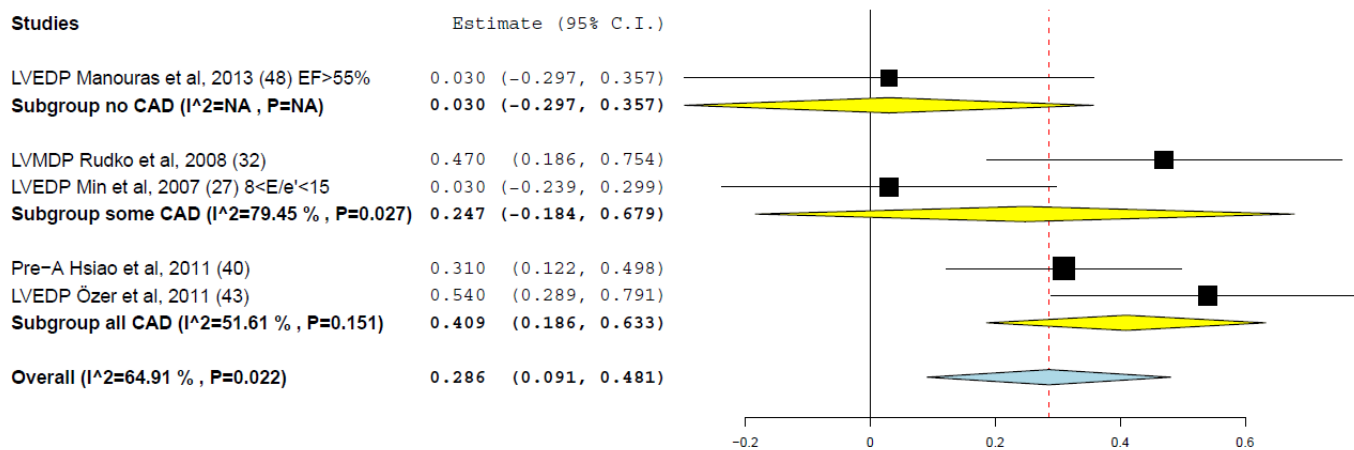

### J. $E/e'_{\text{septal}}$ : Primary data variable measured simultaneously (shown as table 4B in the main text)

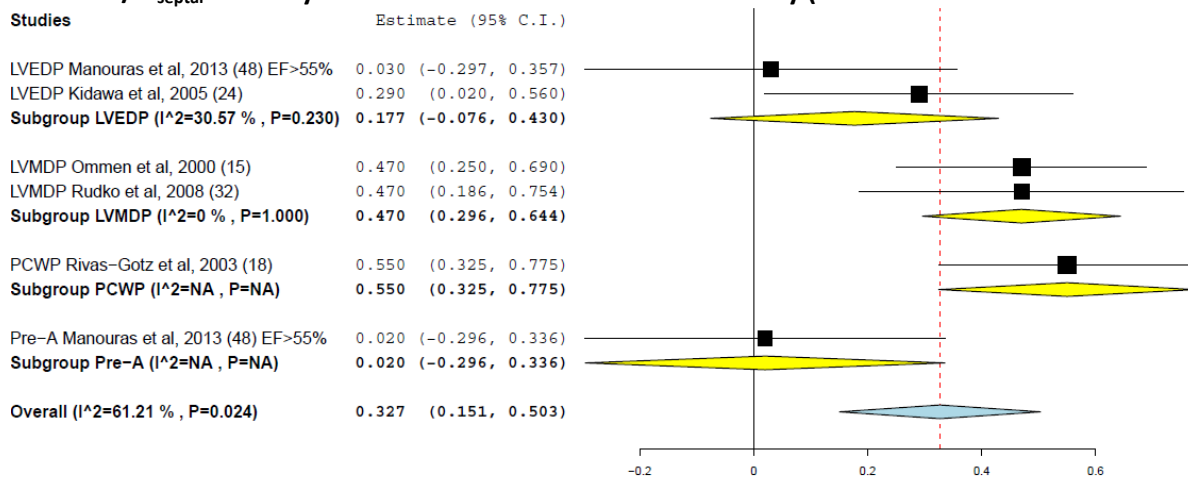

### 5.3. Subgroup analysis for E/e'<sub>mean</sub> and LVFP

#### E/e'<sub>mean</sub>: Dataset for subgroup analysis (see also Tables 1 and 2)

| LVFP                                   | r    | se    | Data      | Timing         | % HFpEF | % CAD    | % HTN    | % DM    | Indication for cath |
|----------------------------------------|------|-------|-----------|----------------|---------|----------|----------|---------|---------------------|
| <b>LVEDP</b>                           |      |       |           |                |         |          |          |         |                     |
| LVEDP Manouras et al, 2013 (48) EF>55% | 0.18 | 0.164 | Primary   | Simultaneously | unclear | no CAD   | unclear  | unclear | angiography         |
| LVEDP Dokanish et al, 2010 (35)        | 0.68 | 0.07  | Primary   | NOT Simultan.  | unclear | some CAD | ~90% HTN | ~40% DM | angiography         |
| LVEDP Özer et al, 2011 (43)            | 0.35 | 0.143 | Primary   | NOT Simultan.  | unclear | all CAD  | ~60% HTN | ~40% DM | angiography         |
| LVEDP Previtali et al, 2012 (46)       | 0.23 | 0.131 | Primary   | NOT Simultan.  | 0% HF   | unclear  | unclear  | unclear | unclear             |
| LVEDP Bruch et al, 2005 (22) EF>45%    | 0.68 | 0.144 | Supplemer | NOT Simultan.  | all HF  | some CAD | ~80% HTN | unclear | dyspnea             |
| LVEDP Poerner et al, 2003 (17) E/A>0.9 | 0.45 | 0.098 | Supplemer | NOT Simultan.  | unclear | unclear  | unclear  | unclear | angiography         |
| <b>PCWP</b>                            |      |       |           |                |         |          |          |         |                     |
| PCWP Rivas-Gotz et al, 2003 (18)       | 0.57 | 0.113 | Primary   | Simultaneously | unclear | unclear  | unclear  | unclear | ICU/Cath lab        |
| PCWP Wang et al, 2007 (29)             | 0.65 | 0.179 | Primary   | Simultaneously | unclear | unclear  | unclear  | unclear | ICU/Cath lab        |
| PCWP Bhella et al, 2011 (39)           | 0.65 | 0.253 | Primary   | Simultaneously | all HF  | no CAD   | all HTN  | ~60% DM | research            |
| PCWP Maeder et al, 2011 (42)           | 0.13 | 0.17  | Primary   | NOT Simultan.  | ~40% HF | unclear  | unclear  | unclear | HF/PAH/volunteers   |
| PCWP Bruch et al, 2005 (22) EF>45%     | 0.56 | 0.162 | Supplemer | NOT Simultan.  | all HF  | some CAD | ~80% HTN | unclear | dyspnea             |
| <b>Pre-A</b>                           |      |       |           |                |         |          |          |         |                     |
| Pre-A Manouras et al, 2013 (48) EF>55% | 0.21 | 0.163 | Primary   | Simultaneously | unclear | no CAD   | unclear  | unclear | angiography         |
| Pre-A Hsiao et al, 2011 (40)           | 0.25 | 0.098 | Primary   | NOT Simultan.  | unclear | all CAD  | ~70% HTN | ~50% DM | angiography         |
| Pre-A Previtali et al, 2012 (46)       | 0.02 | 0.135 | Primary   | NOT Simultan.  | 0% HF   | unclear  | unclear  | unclear | unclear             |
| Pre-A Dokanish et al, 2008 (30)        | 0.39 | 0.168 | Primary   | NOT Simultan.  | unclear | unclear  | unclear  | unclear | dyspnea             |
| Pre-A Dokanish et al, 2010 (34)        | 0.63 | 0.071 | Primary   | NOT Simultan.  | unclear | some CAD | ~90% HTN | ~60% DM | angiography         |
| Pre-A Poerner et al, 2003 (17) E/A>0.9 | 0.57 | 0.09  | Supplemer | NOT Simultan.  | unclear | unclear  | unclear  | unclear | unclear             |
| <b>LVMDP</b>                           |      |       |           |                |         |          |          |         |                     |
| LVMDP Ommen et al, 2000 (15)           | 0.45 | 0.121 | Primary   | Simultaneously | unclear | unclear  | unclear  | unclear | unclear             |

LVFP=left ventricular filling pressure; LVEDP=left ventricular end diastolic pressure; LVMDP=left ventricular mean diastolic pressure; Pre-A DP=left ventricular pre-A wave diastolic pressure; PCWP=pulmonary capillary wedge pressure; CI=confidence interval; HFpEF=heart failure with preserved Ejection Fraction; CAD=coronary artery disease; HTN=hypertension; DM=diabetes mellitus; ICU=intensive care unit. Studies are identified by the first author, year of publication, and reference number (in brackets) as cited in the main text.

### A. LVEDP (primary and supplemental data)

| Studies                                                        | Estimate (95% C.I.)         |
|----------------------------------------------------------------|-----------------------------|
| Manouras et al, 2013 (48) EF>55%                               | 0.180 (-0.141, 0.501)       |
| Dokanish et al, 2010 (35)                                      | 0.680 (0.543, 0.817)        |
| Özer et al, 2011 (43)                                          | 0.350 (0.070, 0.630)        |
| Previtali et al, 2012 (46)                                     | 0.230 (-0.027, 0.487)       |
| <b>Subgroup Primary (I<sup>2</sup>=80.95 % , P=0.001)</b>      | <b>0.380 (0.107, 0.653)</b> |
| Bruch et al, 2005 (22) EF>45%                                  | 0.680 (0.398, 0.962)        |
| Poerner et al, 2003 (17) E/A>0.9                               | 0.450 (0.258, 0.642)        |
| <b>Subgroup Supplemental (I<sup>2</sup>=42.76 % , P=0.186)</b> | <b>0.541 (0.321, 0.761)</b> |
| <b>Overall (I<sup>2</sup>=71.47 % , P=0.004)</b>               | <b>0.447 (0.270, 0.623)</b> |

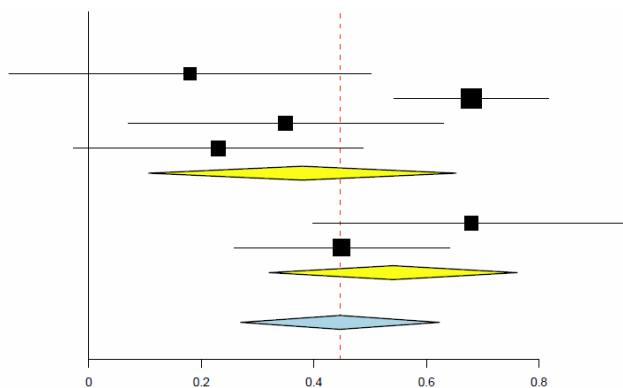

### B. LVEDP (simultaneous and NOT simultaneous)

| Studies                                                             | Estimate (95% C.I.)          |
|---------------------------------------------------------------------|------------------------------|
| Manouras et al, 2013 (48) EF>55%                                    | 0.180 (-0.141, 0.501)        |
| <b>Subgroup Simultaneously (I<sup>2</sup>=NA , P=NA)</b>            | <b>0.180 (-0.141, 0.501)</b> |
| Previtali et al, 2012 (46)                                          | 0.230 (-0.027, 0.487)        |
| Poerner et al, 2003 (17) E/A>0.9                                    | 0.450 (0.258, 0.642)         |
| Özer et al, 2011 (43)                                               | 0.350 (0.070, 0.630)         |
| Bruch et al, 2005 (22) EF>45%                                       | 0.680 (0.398, 0.962)         |
| Dokanish et al, 2010 (35)                                           | 0.680 (0.543, 0.817)         |
| <b>Subgroup NOT Simultaneously (I<sup>2</sup>=69.6 % , P=0.011)</b> | <b>0.490 (0.312, 0.667)</b>  |
| <b>Overall (I<sup>2</sup>=71.5 % , P=0.004)</b>                     | <b>0.447 (0.270, 0.623)</b>  |

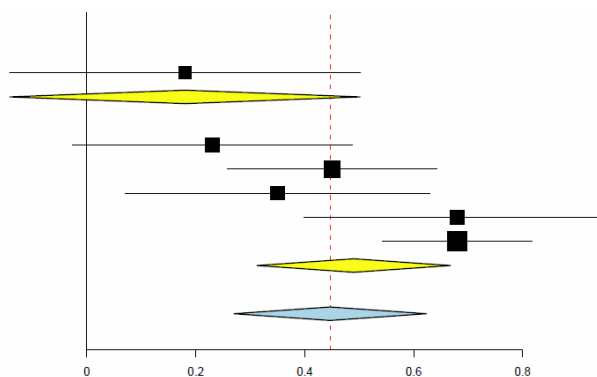

### C. PCWP (primary and supplemental data)

| Studies                                                  | Estimate (95% C.I.)         |
|----------------------------------------------------------|-----------------------------|
| Rivas-Gotz et al, 2003 (18)                              | 0.570 (0.349, 0.791)        |
| Wang et al, 2007 (29)                                    | 0.650 (0.299, 1.001)        |
| Maeder et al, 2011 (42)                                  | 0.130 (-0.203, 0.463)       |
| Bhella et al, 2011 (39)                                  | 0.650 (0.154, 1.146)        |
| <b>Subgroup Primary (I<sup>2</sup>=51.4 % , P=0.103)</b> | <b>0.491 (0.252, 0.730)</b> |
| Bruch et al, 2005 (22) EF>45%                            | 0.560 (0.242, 0.878)        |
| <b>Subgroup Supplemental (I<sup>2</sup>=NA , P=NA)</b>   | <b>0.560 (0.242, 0.878)</b> |
| <b>Overall (I<sup>2</sup>=36.41 % , P=0.178)</b>         | <b>0.505 (0.323, 0.688)</b> |

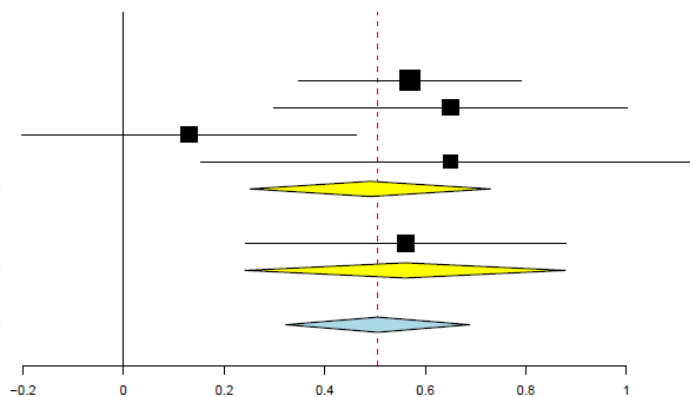

Heterogeneity amongst the studies was estimated by I<sup>2</sup> statistic. Studies are identified by the first author, year of publication, and reference number (in brackets) as cited in the main text. OpenMetaAnalyst software (12) for Windows (64-bit version) was used for statistical analysis including graphical presentations of forest plots.



### D. PCWP (simultaneous and NOT simultaneous)

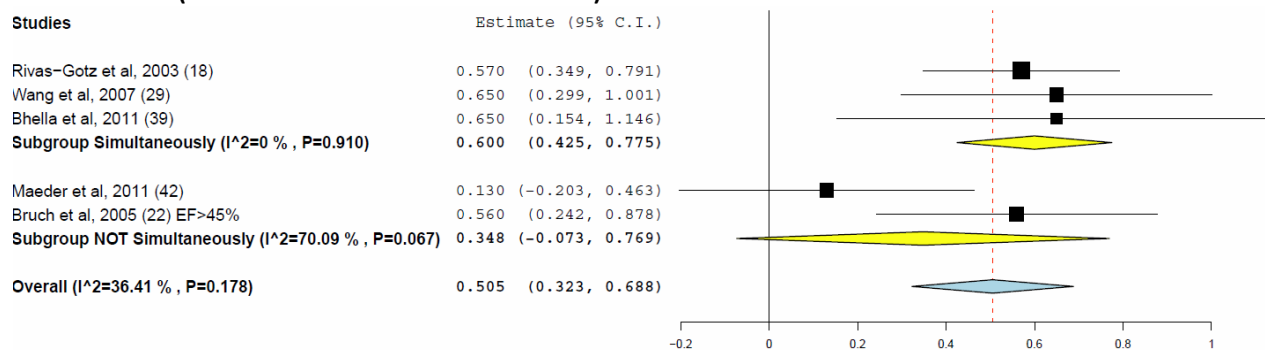

### E. Pre-A (primary and supplemental data)

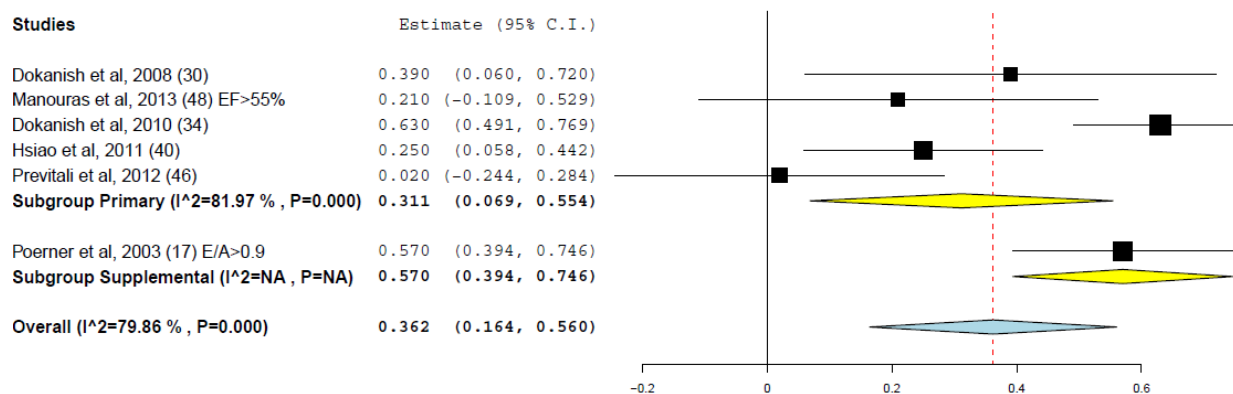

### F. Pre-A (simultaneous and NOT simultaneous)

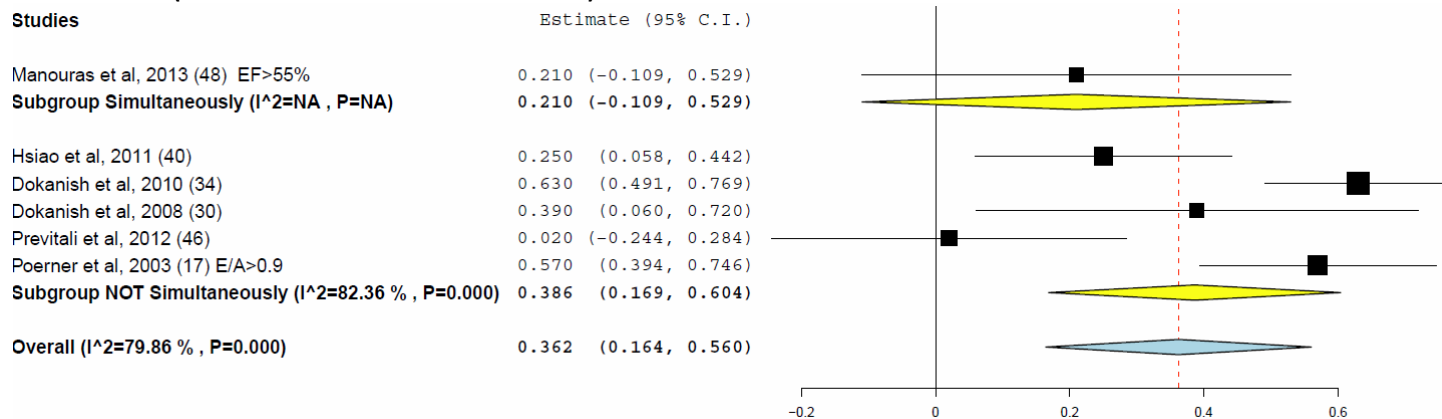

## SUBGPOUP ANALYSIS for COMBINED LVFP and $E/e'_{\text{mean}}$

For combined LVFP analysis, if the study measured two LVFP parameters we chose that had the highest correlation coefficient.

### G. $E/e'_{\text{mean}}$ : combined LVFP (primary and supplemental data)

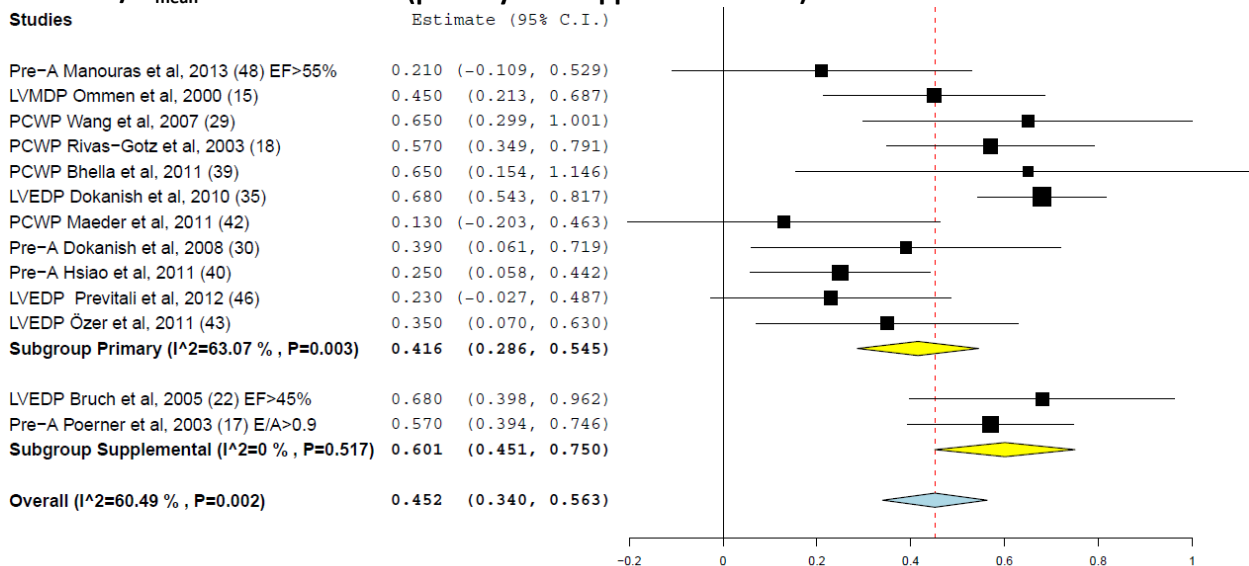

### H. $E/e'_{\text{mean}}$ : combined LVFP (simultaneous and NOT simultaneous)

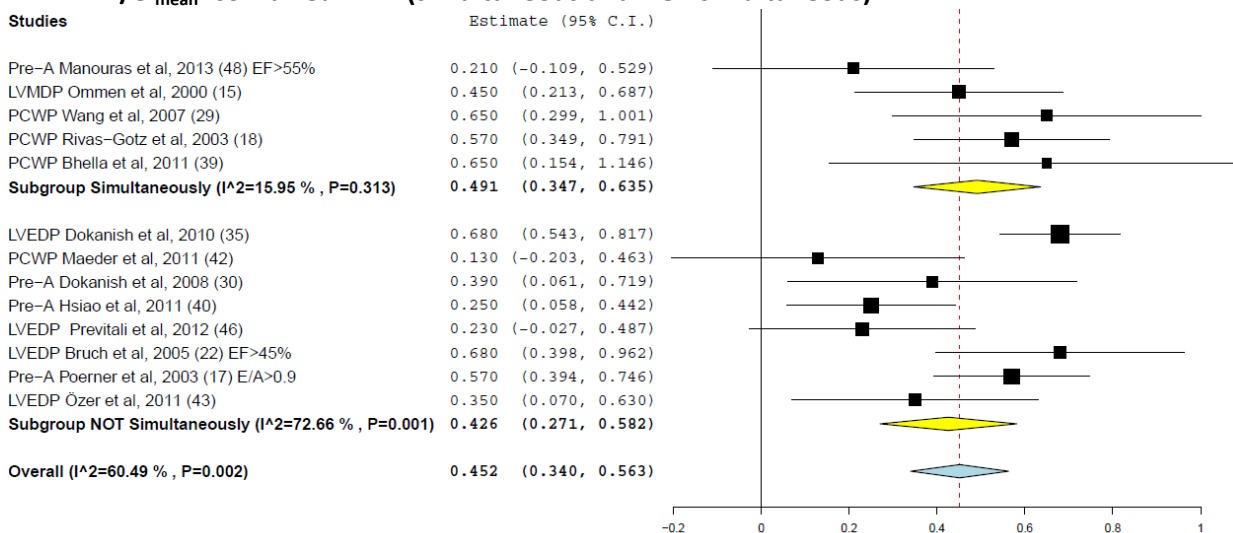

### I. $E/e'_{\text{mean}}$ : combined LVFP (HFpEF prevalence)

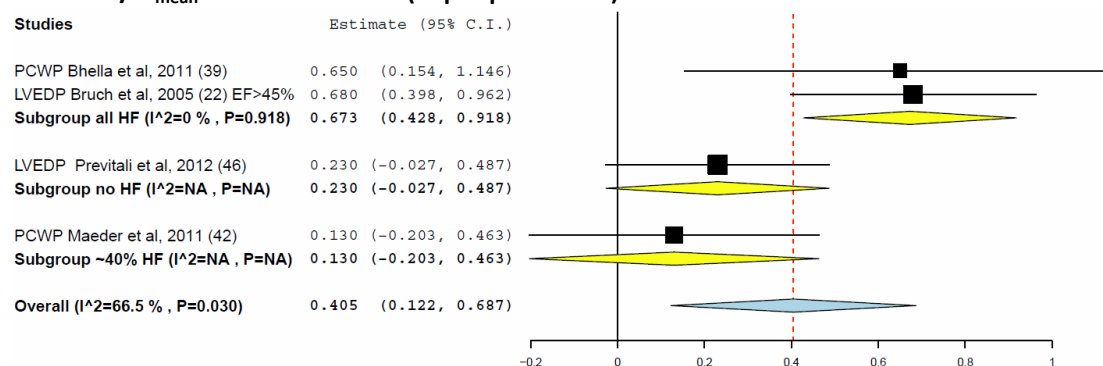

### J. $E/e'_{\text{mean}}$ : combined LVFP (CAD prevalence)

| Studies                                                                 | Estimate (95% C.I.)          |
|-------------------------------------------------------------------------|------------------------------|
| Pre-A Hsiao et al, 2011 (40)                                            | 0.250 (0.058, 0.442)         |
| LVEDP Özer et al, 2011 (43)                                             | 0.350 (0.070, 0.630)         |
| <b>Subgroup All CAD (<math>I^2=0\%</math>, <math>P=0.564</math>)</b>    | <b>0.282 (0.124, 0.440)</b>  |
| Pre-A Manouras et al, 2013 (48) EF>55%                                  | 0.210 (-0.109, 0.529)        |
| PCWP Bhella et al, 2011 (39)                                            | 0.650 (0.154, 1.146)         |
| <b>Subgroup no CAD (<math>I^2=53.21\%</math>, <math>P=0.144</math>)</b> | <b>0.387 (-0.036, 0.811)</b> |
| LVEDP Dokanish et al, 2010 (35)                                         | 0.680 (0.543, 0.817)         |
| LVEDP Bruch et al, 2005 (22) EF>45%                                     | 0.680 (0.398, 0.962)         |
| <b>Subgroup some CAD (<math>I^2=0\%</math>, <math>P=1.000</math>)</b>   | <b>0.680 (0.557, 0.803)</b>  |
| <b>Overall (<math>I^2=74.07\%</math>, <math>P=0.002</math>)</b>         | <b>0.465 (0.264, 0.667)</b>  |

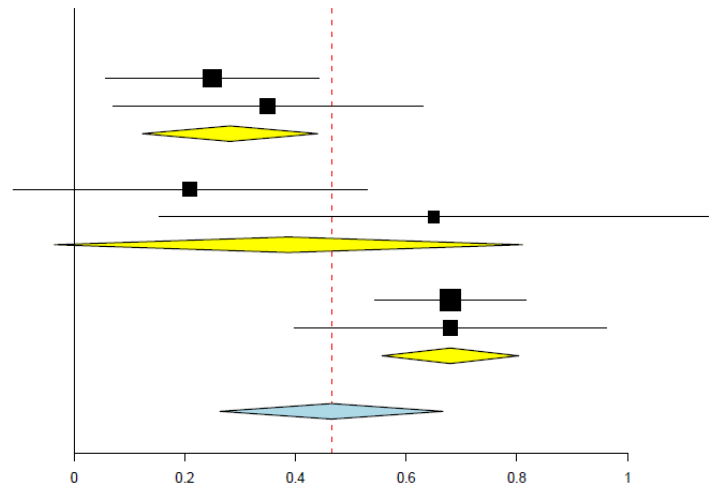

### K. $E/e'_{\text{mean}}$ : combined LVFP (HTN prevalence)

| Studies                                                            | Estimate (95% C.I.)         |
|--------------------------------------------------------------------|-----------------------------|
| PCWP Bhella et al, 2011 (39)                                       | 0.650 (0.154, 1.146)        |
| <b>Subgroup ~100% HTN (<math>I^2=NA</math>, <math>P=NA</math>)</b> | <b>0.650 (0.154, 1.146)</b> |
| LVEDP Dokanish et al, 2010 (35)                                    | 0.680 (0.543, 0.817)        |
| <b>Subgroup ~90% HTN (<math>I^2=NA</math>, <math>P=NA</math>)</b>  | <b>0.680 (0.543, 0.817)</b> |
| LVEDP Bruch et al, 2005 (22) EF>45%                                | 0.680 (0.398, 0.962)        |
| <b>Subgroup ~80% HTN (<math>I^2=NA</math>, <math>P=NA</math>)</b>  | <b>0.680 (0.398, 0.962)</b> |
| Pre-A Hsiao et al, 2011 (40)                                       | 0.250 (0.058, 0.442)        |
| <b>Subgroup ~70% HTN (<math>I^2=NA</math>, <math>P=NA</math>)</b>  | <b>0.250 (0.058, 0.442)</b> |
| LVEDP Özer et al, 2011 (43)                                        | 0.350 (0.070, 0.630)        |
| <b>Subgroup ~60% HTN (<math>I^2=NA</math>, <math>P=NA</math>)</b>  | <b>0.350 (0.070, 0.630)</b> |
| Pre-A Manouras et al, 2013 (48) EF>40%                             | 0.480 (0.262, 0.698)        |
| <b>Subgroup ~40% HTN (<math>I^2=NA</math>, <math>P=NA</math>)</b>  | <b>0.480 (0.262, 0.698)</b> |
| <b>Overall (<math>I^2=68.45\%</math>, <math>P=0.007</math>)</b>    | <b>0.504 (0.333, 0.676)</b> |

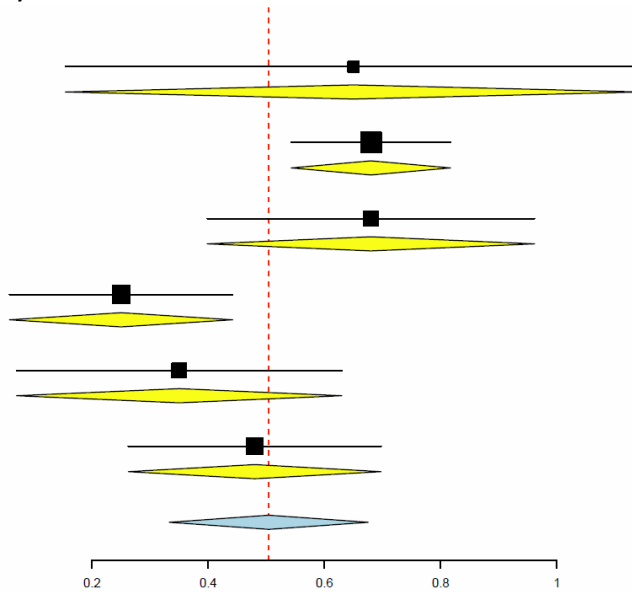

### L. $E/e'_{\text{mean}}$ : Primary data variables measured simultaneously (shown as table 4B in the main text)

| Studies                                                           | Estimate (95% C.I.)          |
|-------------------------------------------------------------------|------------------------------|
| LVEDP Manouras et al, 2013 (48) EF>55%                            | 0.180 (-0.141, 0.501)        |
| <b>Subgroup LVEDP (<math>I^2=NA</math>, <math>P=NA</math>)</b>    | <b>0.180 (-0.141, 0.501)</b> |
| PCWP Rivas-Gotz et al, 2003 (18)                                  | 0.570 (0.349, 0.791)         |
| PCWP Wang et al, 2007 (29)                                        | 0.650 (0.299, 1.001)         |
| PCWP Bhella et al, 2011 (39)                                      | 0.650 (0.154, 1.146)         |
| <b>Subgroup PCWP (<math>I^2=0\%</math>, <math>P=0.910</math>)</b> | <b>0.600 (0.425, 0.775)</b>  |
| Pre-A Manouras et al, 2013 (48) EF>55%                            | 0.210 (-0.109, 0.529)        |
| <b>Subgroup Pre-A (<math>I^2=NA</math>, <math>P=NA</math>)</b>    | <b>0.210 (-0.109, 0.529)</b> |
| LVMDP Ommen et al, 2000 (15)                                      | 0.450 (0.213, 0.687)         |
| <b>Subgroup LVMDP (<math>I^2=NA</math>, <math>P=NA</math>)</b>    | <b>0.450 (0.213, 0.687)</b>  |
| <b>Overall (<math>I^2=36.54\%</math>, <math>P=0.163</math>)</b>   | <b>0.443 (0.287, 0.599)</b>  |

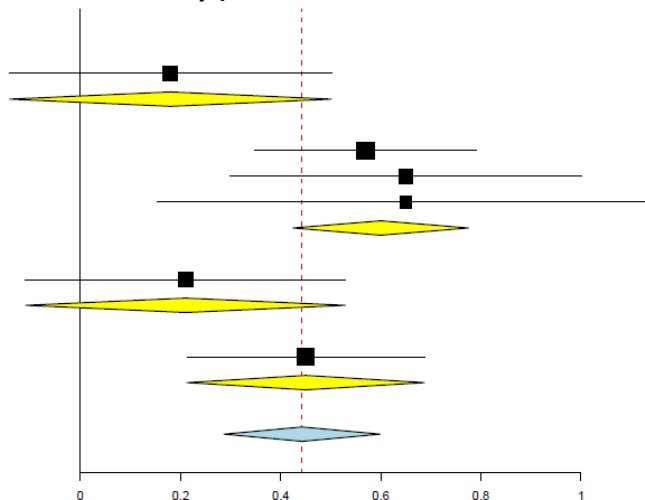

## APPENDIX 6

### Secondary analysis of sensitivity/specificity of E/e' cutoffs to predict elevated LVFP

#### 6.1. Subgroup analysis for E/e' <sub>lateral</sub> >12 to identify elevated LVFP

#### E/e' <sub>lateral</sub>: Dataset for subgroup analysis (see also Tables 1 and 2)

| study                                                         | TP | FN | FP | TN | SENS.        | lower | upper | SPEC.        | lower | upper | Data     | Timing           | % HFpEF | % CAD    | % HTN    | % DM    | Indication for cath | LR+  |
|---------------------------------------------------------------|----|----|----|----|--------------|-------|-------|--------------|-------|-------|----------|------------------|---------|----------|----------|---------|---------------------|------|
| LVEDP Kidawa et al, 2005 (24)                                 | 6  | 13 | 1  | 25 | <b>0.316</b> | 0.149 | 0.548 | <b>0.962</b> | 0.772 | 0.995 | Primary  | Simultaneously   | unclear | unclear  | unclear  | unclear | angiography         | 8.3  |
| PCWP Rivas-Gotz et al, 2003 (18)                              | 15 | 20 | 1  | 15 | <b>0.429</b> | 0.277 | 0.594 | <b>0.937</b> | 0.665 | 0.991 | Primary  | Simultaneously   | Unclear | Unclear  | Unclear  | Unclear | ICU/Cath lab        | 6.8  |
| LVEDP Previtali et al, 2012 (46)                              | 10 | 28 | 8  | 16 | <b>0.263</b> | 0.148 | 0.424 | <b>0.667</b> | 0.461 | 0.824 | Primary  | NOT simultaneous | 0% HF   | unclear  | unclear  | unclear | unclear             | 0.8  |
| LVEDP Hadano et al, 2005 (23)                                 | 5  | 7  | 4  | 47 | <b>0.417</b> | 0.185 | 0.692 | <b>0.922</b> | 0.809 | 0.970 | Primary  | NOT simultaneous | unclear | some CAD | unclear  | unclear | unclear             | 5.3  |
| LVEDP Özer et al, 2011 (43)                                   | 6  | 17 | 1  | 21 | <b>0.261</b> | 0.122 | 0.472 | <b>0.955</b> | 0.739 | 0.994 | Primary  | NOT simultaneous | unclear | all CAD  | ~60% HTN | ~40% DM | angiography         | 5.8  |
| Pre-A Mansencal et al, 2004 (20)                              | 0  | 5  | 0  | 15 | <b>0.083</b> | 0.005 | 0.622 | <b>0.969</b> | 0.650 | 0.998 | Primary  | NOT simultaneous | ~5% HF  | all CAD  | ~10% HTN | unclear | angiography         | 2.7  |
| LVEDP Poerner et al, 2007 (28) EF>~40%                        | 31 | 17 | 29 | 64 | <b>0.646</b> | 0.502 | 0.767 | <b>0.688</b> | 0.587 | 0.774 | Suppleme | NOT simultaneous | Unclear | some CAD | ~60% HTN | ~30% DM | angiography         | 2.1  |
| PCWP Nagueh et al, 1998 (14) EF>45% Sinus Tachycardia >100bpm | 11 | 15 | 0  | 17 | <b>0.426</b> | 0.257 | 0.614 | <b>0.972</b> | 0.678 | 0.998 | Suppleme | Simultaneously   | Unclear | Unclear  | Unclear  | Unclear | ICU/Cath lab        | 15.2 |
| LVEDP Penicka et al, 2010 (38) Uncertainty with 10% patients  | 8  | 12 | 2  | 8  | <b>0.400</b> | 0.214 | 0.620 | <b>0.800</b> | 0.459 | 0.950 | Suppleme | Simultaneously   | ~70% HF | no CAD   | ~70% HTN | ~30% DM | dyspnea             | 2.0  |

LVFP=left ventricular filling pressure; LVEDP=left ventricular end diastolic pressure; LVMDP=left ventricular mean diastolic pressure; Pre-A DP=left ventricular pre-A wave diastolic pressure; PCWP=pulmonary capillary wedge pressure; CI=confidence interval; HFpEF=heart failure with preserved Ejection Fraction; CAD=coronary artery disease; HTN=hypertension; DM=diabetes mellitus; ICU=intensive care unit; TP=true positive; FP= false positive; FN= false negative; TN=true negative; Sens.= sensitivity; Spec.=specificity; LR+=positive likelihood ratio. Studies are identified by the first author, year of publication, and reference number (in brackets) as cited in the main text.

## A. Combined LVFP (primary and supplemental data)

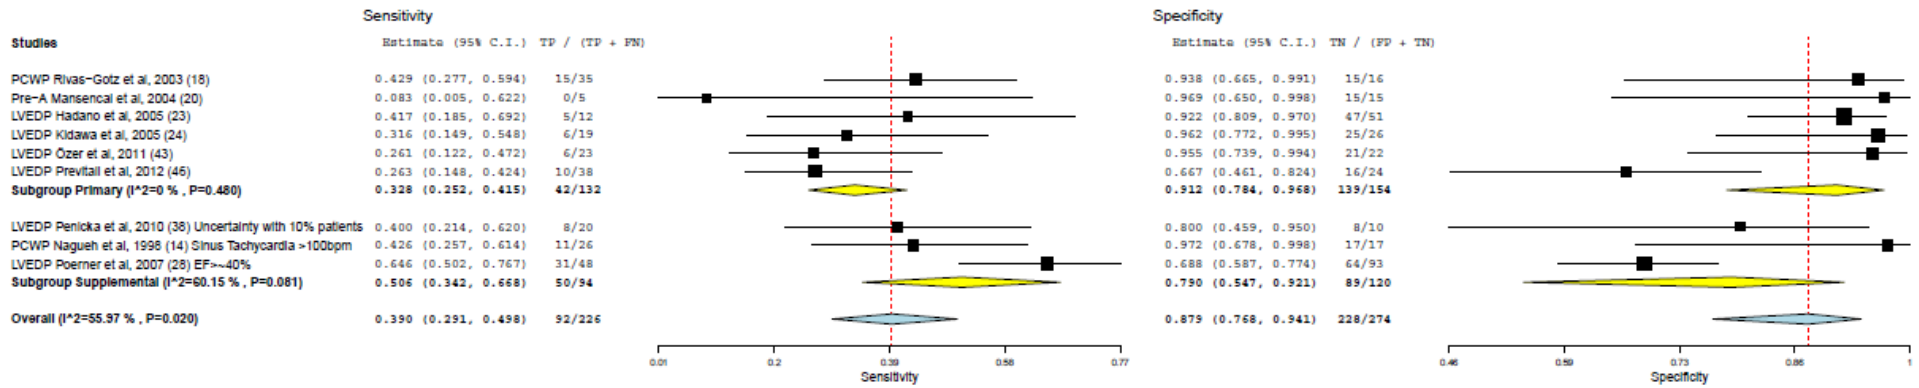

### HSROC analysis

Primary studies combined (n=6, as in Figure 3)  
Sensitivity (summary) 0.30 (0.09 - 0.48)  
Specificity (summary) 0.92 (0.83 - 1.0)

Supplemental studies combined (n=3)  
Sensitivity (summary) 0.50 (0.10 - 0.84)  
Specificity (summary) 0.85 (0.50 - 1.0)

All studies combined (n=9)  
Sensitivity (summary) 0.36 (0.18 - 0.51)  
Specificity (summary) 0.91 (0.81 - 0.99)

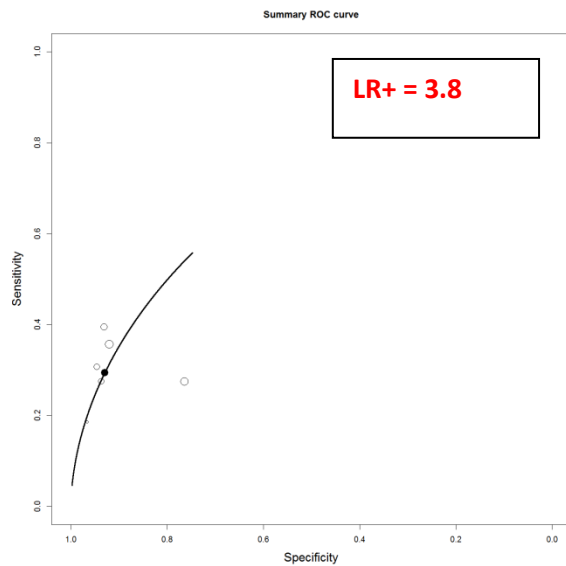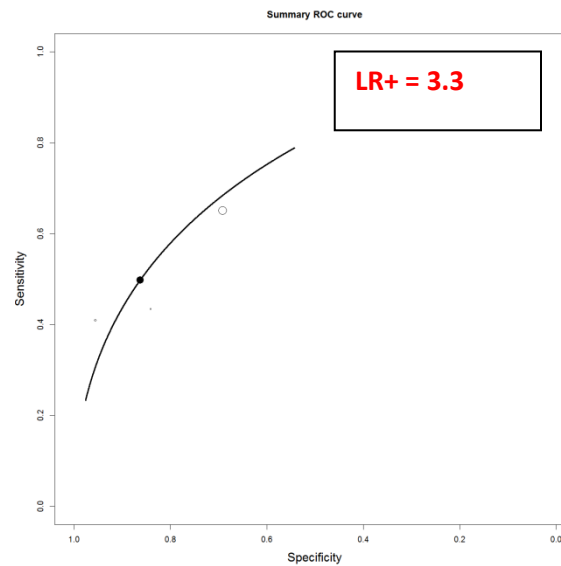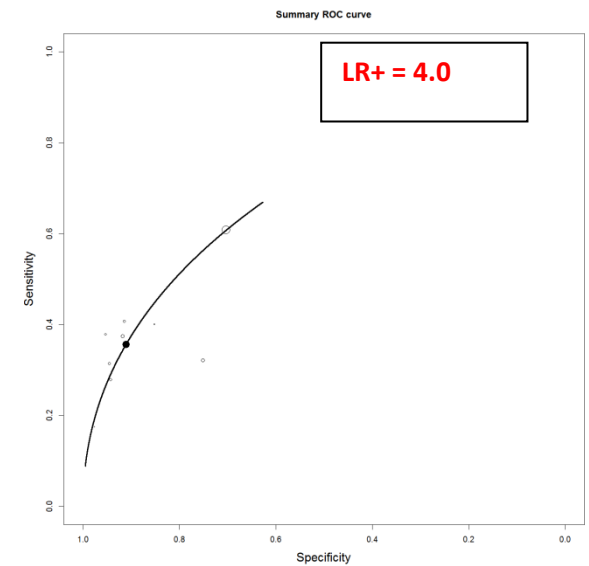

TP=true positive; FP= false positive; FN= false negative; TN=true negative; Sens.= sensitivity; Spec.=specificity; LR+=positive likelihood ratio; HSROC=hierarchical summary receiver operating characteristic. Heterogeneity amongst the studies was estimated by I<sup>2</sup> statistic. Studies are identified by the first author, year of publication, and reference number (in brackets) as cited in the main text. OpenMetaAnalyst software (12) for Windows (64-bit version) was used for statistical analysis including graphical presentations of forest plots.

## B. Combined LVFP (Simultaneous and not simultaneous measurements)

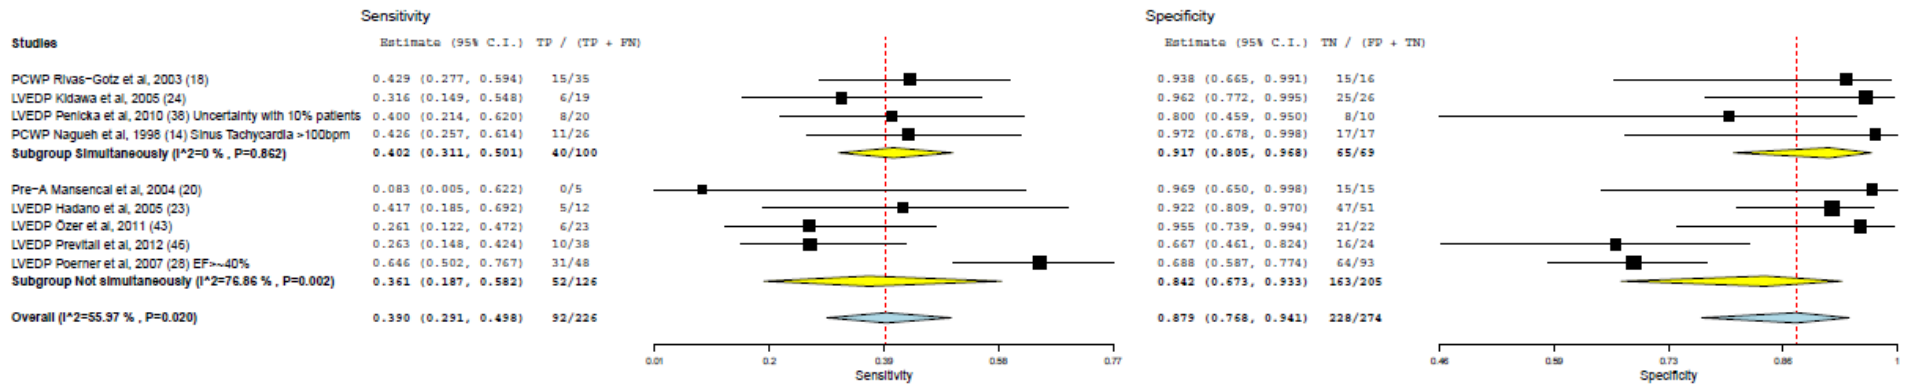

### HSROC analysis

Simultaneous studies combined (n=4)  
 Sensitivity (summary) 0.39 (0.18 - 0.58)  
 Specificity (summary) 0.94 (0.40 - 1.0)

Not Simultaneous studies combined (n=5)  
 Sensitivity (summary) 0.30 (0.06 - 0.59)  
 Specificity (summary) 0.90 (0.76 - 1.0)

All studies combined (n=9)  
 Sensitivity (summary) 0.36 (0.18 - 0.51)  
 Specificity (summary) 0.91 (0.81 - 0.99)

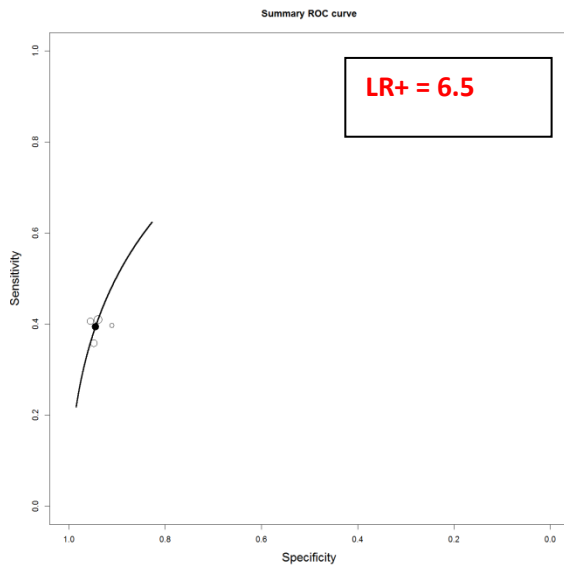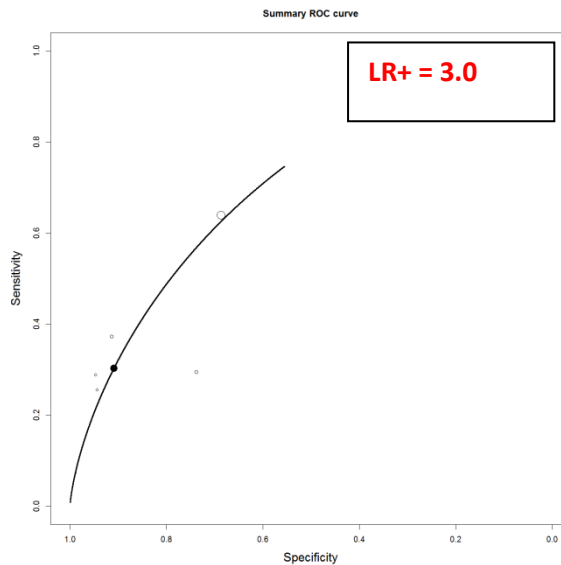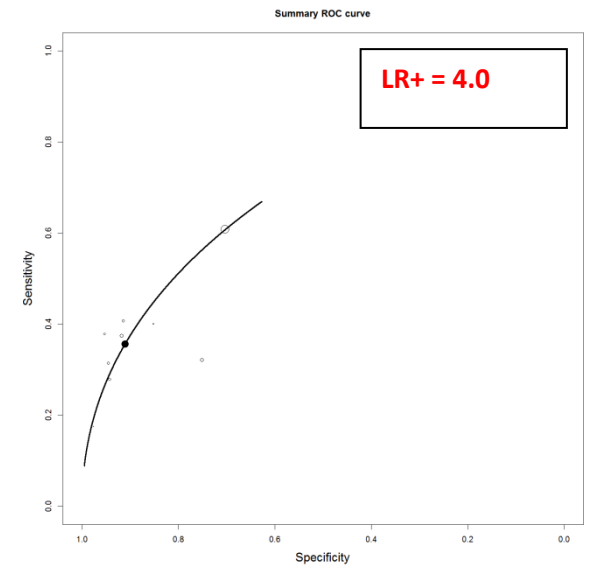

### C. Separate analysis for LVFP measurements

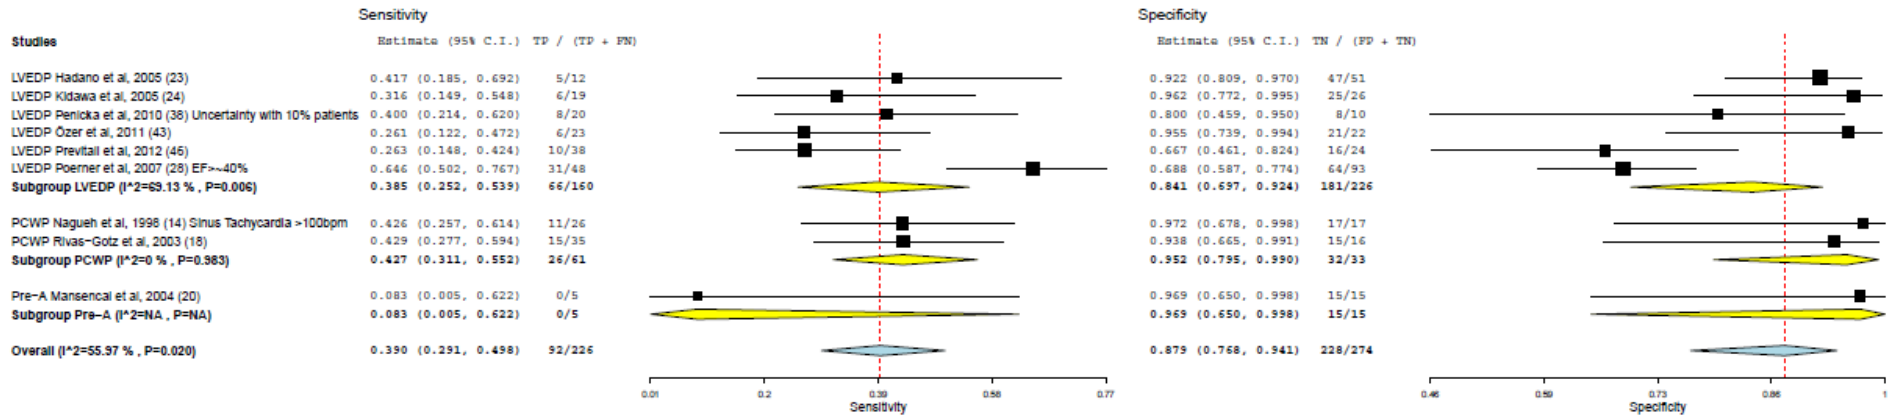

### HSROC analysis

LVEDP studies combined (n=6)  
 Sensitivity (summary) 0.38 (0.17 - 0.59)  
 Specificity (summary) 0.86 (0.71 - 0.98)

All studies combined (n=9)  
 Sensitivity (summary) 0.36 (0.18 - 0.51)  
 Specificity (summary) 0.91 (0.81 - 0.99)

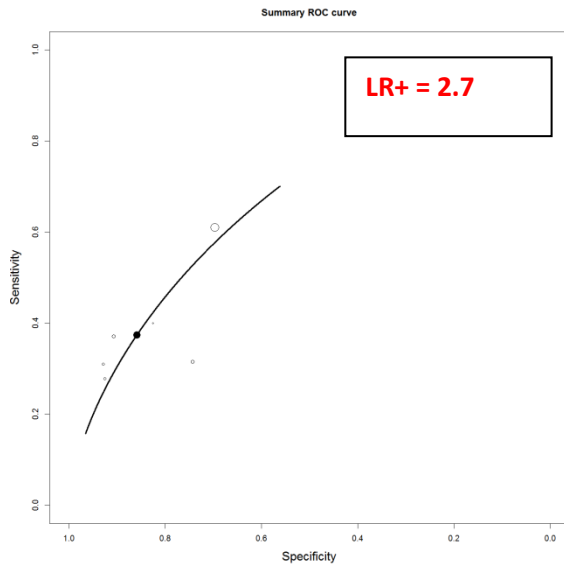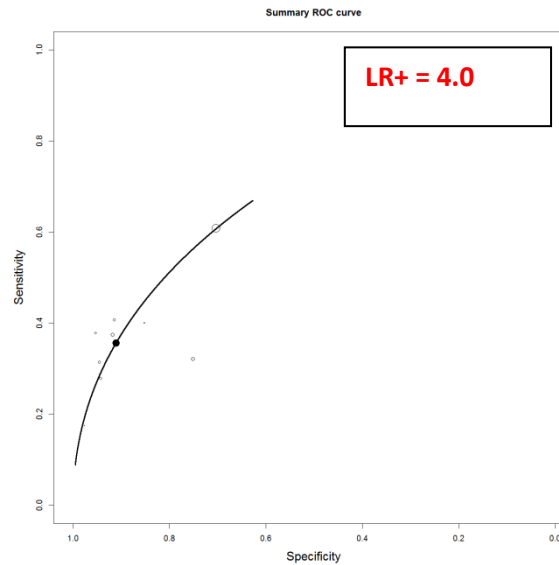

There are insufficient number of studies that measured PCWP (n=2) to perform a meaningful analysis.

### D. PRIMARY DATA SUMMARY - Primary studies only (Simultaneous and Not Simultaneous)

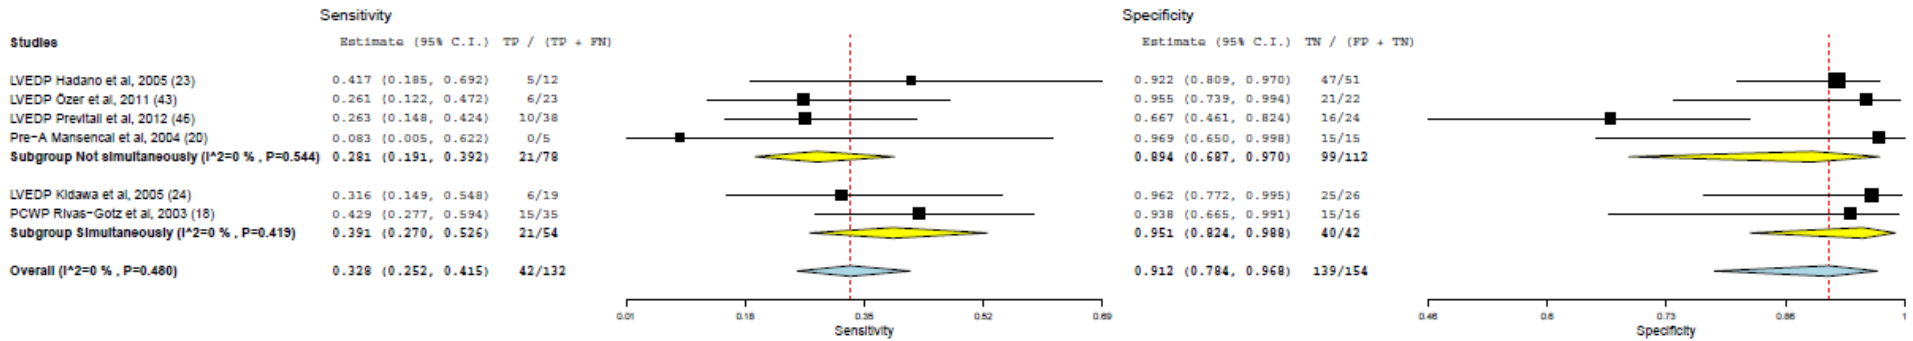

### HSROC analysis

Primary Not Simultaneous studies (n=4)  
 Sensitivity (summary) 0.22 (0.01 - 0.53)  
 Specificity (summary) 0.92 (0.70 - 1.0)

All primary studies combined (n=6)  
 Sensitivity (summary) 0.36 (0.18 - 0.51)  
 Specificity (summary) 0.92 (0.83 - 1.0)

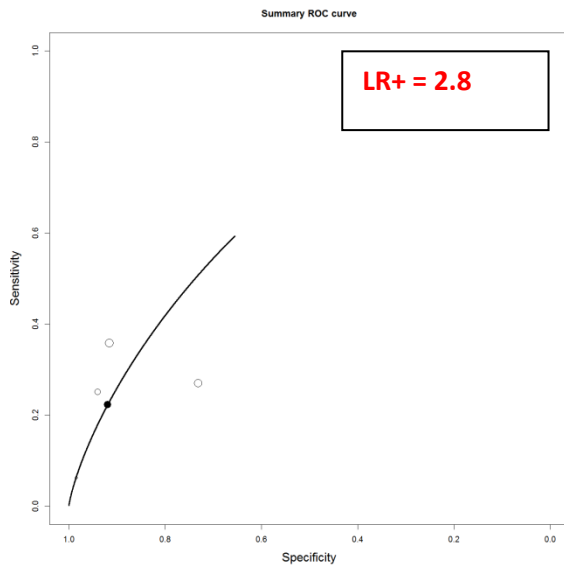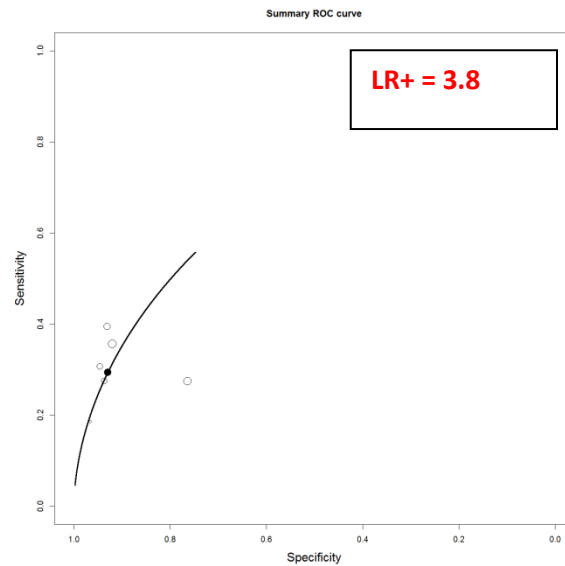

There are insufficient number of studies that performed simultaneous measurements (n=2) to perform a meaningful analysis.



## 6.2. Subgroup analysis for $E/e'_{\text{mean}} > 13$ to identify elevated LVFP

### $E/e'_{\text{mean}}$ : Dataset for subgroup analysis (see also Tables 1 and 2)

| study                                                        | TP | FN | FP | TN | SENS.        | lower | upper | SPEC.        | lower | upper | Data     | Timing          | % HFpEF | % CAD    | % HTN    | % DM    | Indication for cath | LR+ |
|--------------------------------------------------------------|----|----|----|----|--------------|-------|-------|--------------|-------|-------|----------|-----------------|---------|----------|----------|---------|---------------------|-----|
| LVEDP Manouras et al, 2013 (48) EF>55%                       | 2  | 22 | 1  | 10 | <b>0.083</b> | 0.021 | 0.279 | <b>0.909</b> | 0.561 | 0.987 | Primary  | Simultaneously  | unclear | no CAD   | unclear  | unclear | angiography         | 0.9 |
| PCWP Bhella et al, 2011 (39)                                 | 3  | 2  | 0  | 5  | <b>0.583</b> | 0.216 | 0.876 | <b>0.917</b> | 0.378 | 0.995 | Primary  | Simultaneously  | 100% HF | no CAD   | 100% HTN | ~60% DM | research            | 7.0 |
| PCWP Dokainish et al, 2004 (19)                              | 6  | 5  | 2  | 6  | <b>0.545</b> | 0.268 | 0.797 | <b>0.750</b> | 0.377 | 0.937 | Primary  | Simultaneously  | unclear | unclear  | ~60% HTN | ~20% DM | ICU/CCU             | 2.2 |
| LVEDP Dokainish et al, 2010 (35)                             | 57 | 42 | 3  | 20 | <b>0.576</b> | 0.477 | 0.669 | <b>0.870</b> | 0.665 | 0.957 | Primary  | NOT simultaneou | unclear | some CAD | ~90% HTN | ~40% DM | angiography         | 4.4 |
| LVEDP Özer et al, 2011 (43)                                  | 6  | 17 | 1  | 21 | <b>0.261</b> | 0.122 | 0.472 | <b>0.955</b> | 0.739 | 0.994 | Primary  | NOT simultaneou | unclear | all CAD  | ~60% HTN | ~40% DM | angiography         | 5.8 |
| Pre-A Dini et al, 2010 (33)                                  | 9  | 17 | 2  | 27 | <b>0.346</b> | 0.191 | 0.543 | <b>0.931</b> | 0.762 | 0.983 | Primary  | NOT simultaneou | 100% HF | unclear  | unclear  | unclear | dyspnea             | 5.0 |
| LVEDP Penicka et al, 2010 (38) Uncertainty with 10% patients | 6  | 14 | 1  | 9  | <b>0.300</b> | 0.141 | 0.527 | <b>0.900</b> | 0.533 | 0.986 | Suppleme | Simultaneously  | ~70% HF | no CAD   | ~70% HTN | ~30% DM | dyspnea             | 3.0 |
| LVEDP Bruch et al, 2005 (22) EF>45%                          | 9  | 2  | 5  | 10 | <b>0.818</b> | 0.493 | 0.954 | <b>0.667</b> | 0.406 | 0.854 | Suppleme | NOT simultaneou | 100% HF | some CAD | ~80% HTN | unclear | dyspnea             | 2.5 |

LVFP=left ventricular filling pressure; LVEDP=left ventricular end diastolic pressure; LVMDP=left ventricular mean diastolic pressure; Pre-A DP=left ventricular pre-A wave diastolic pressure; PCWP=pulmonary capillary wedge pressure; CI=confidence interval; HFpEF=heart failure with preserved Ejection Fraction; CAD=coronary artery disease; HTN=hypertension; DM=diabetes mellitus; ICU=intensive care unit; TP=true positive; FP= false positive; FN= false negative; TN=true negative; Sens.= sensitivity; Spec.=specificity; LR+=positive likelihood ratio. Studies are identified by the first author, year of publication, and reference number (in brackets) as cited in the main text.

## A. Combined LVFP (primary and supplemental data)

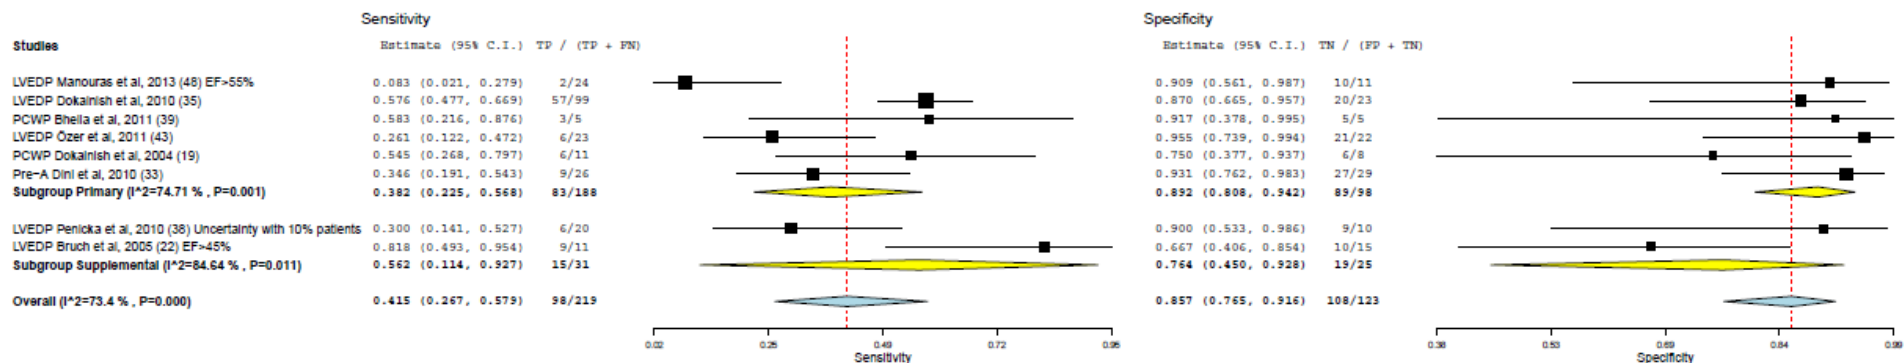

### HSROC analysis

Primary studies combined (n=6, as in Figure 3)

Sensitivity (summary) 0.37 (0.13 - 0.61)

Specificity (summary) 0.91 (0.81 - 0.99)

All studies combined (n=8)

Sensitivity (summary) 0.42 (0.19 - 0.65)

Specificity (summary) 0.89 (0.77 - 0.98)

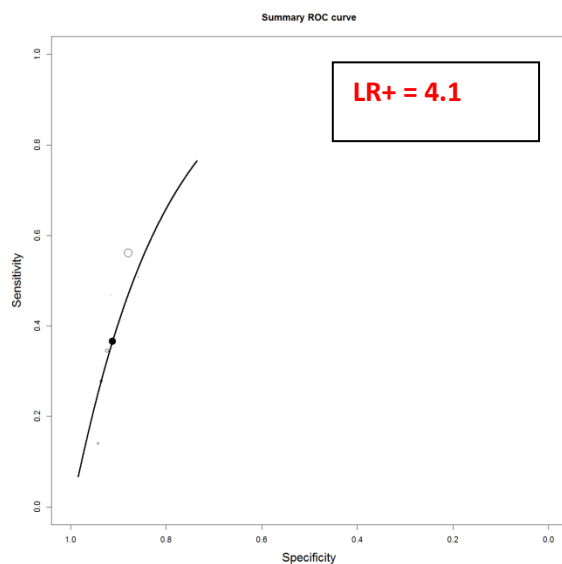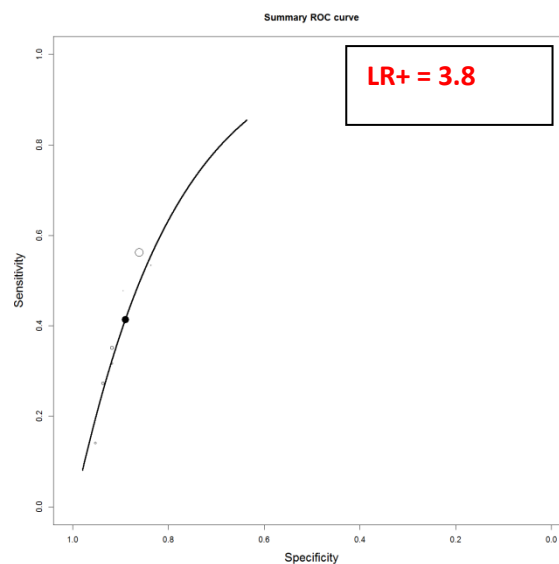

There are insufficient number of studies that provided supplemental data (n=2) to perform a meaningful analysis.

TP=true positive; FP= false positive; FN= false negative; TN=true negative; Sens.= sensitivity; Spec.=specificity; LR+=positive likelihood ratio; HSROC=hierarchical summary receiver operating characteristic. Heterogeneity amongst the studies was estimated by I<sup>2</sup> statistic. Studies are identified by the first author, year of publication, and reference number (in brackets) as cited in the main text. OpenMetaAnalyst software (12) for Windows (64-bit version) was used for statistical analysis including graphical presentations of forest plots.

## B. Combined LVFP (Simultaneous and not simultaneous measurements)

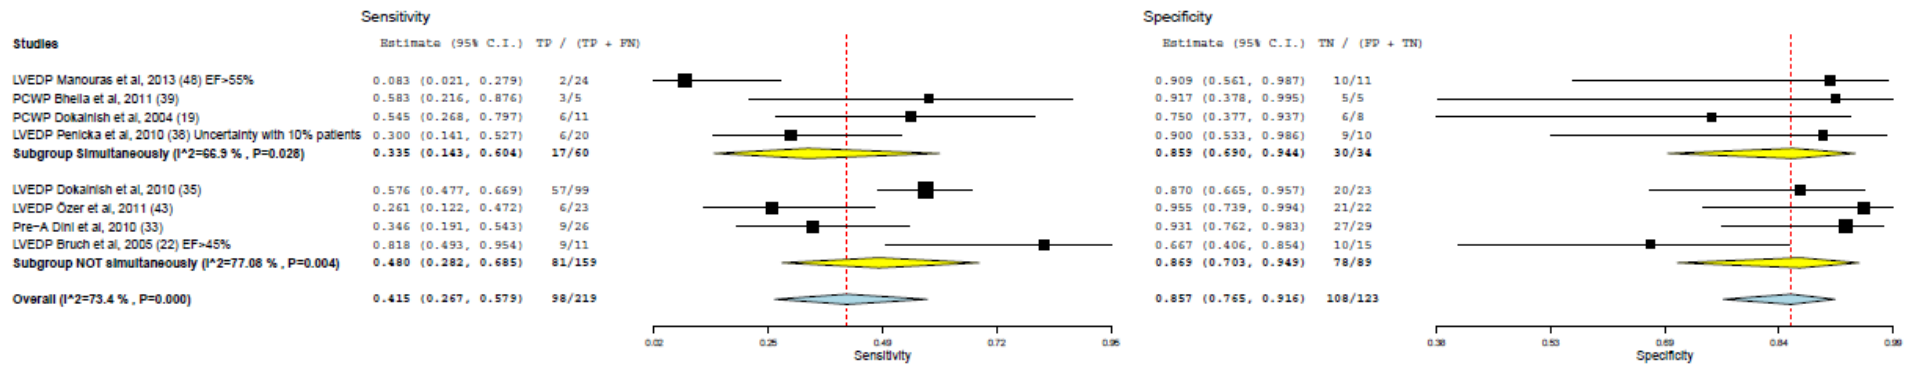

### HSROC analysis

Simultaneous studies combined (n=4)  
 Sensitivity (summary) 0.31 (0.04 - 0.67)  
 Specificity (summary) 0.89 (0.67 - 1.0)

NOT Simultaneous studies combined (n=4)  
 Sensitivity (summary) 0.50 (0.11 - 0.84)  
 Specificity (summary) 0.88 (0.65 - 1.0)

All studies combined (n=8)  
 Sensitivity (summary) 0.42 (0.19 - 0.65)  
 Specificity (summary) 0.89 (0.77 - 0.98)

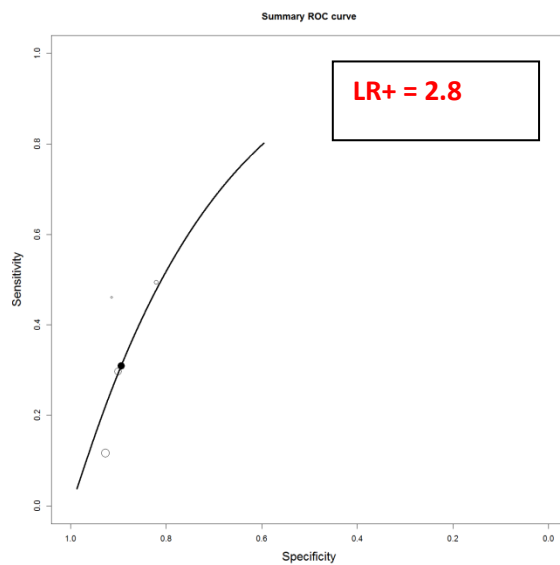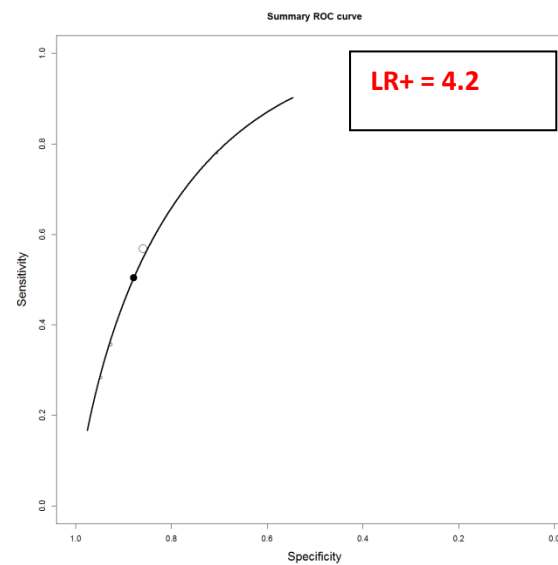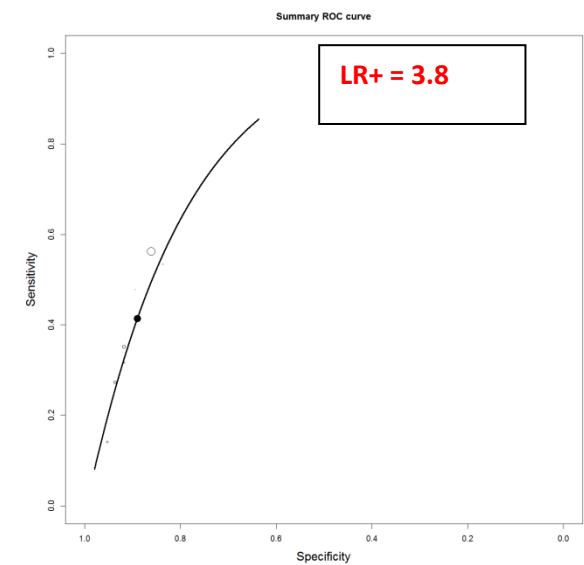

### C. Separate analysis for LVFP measurements

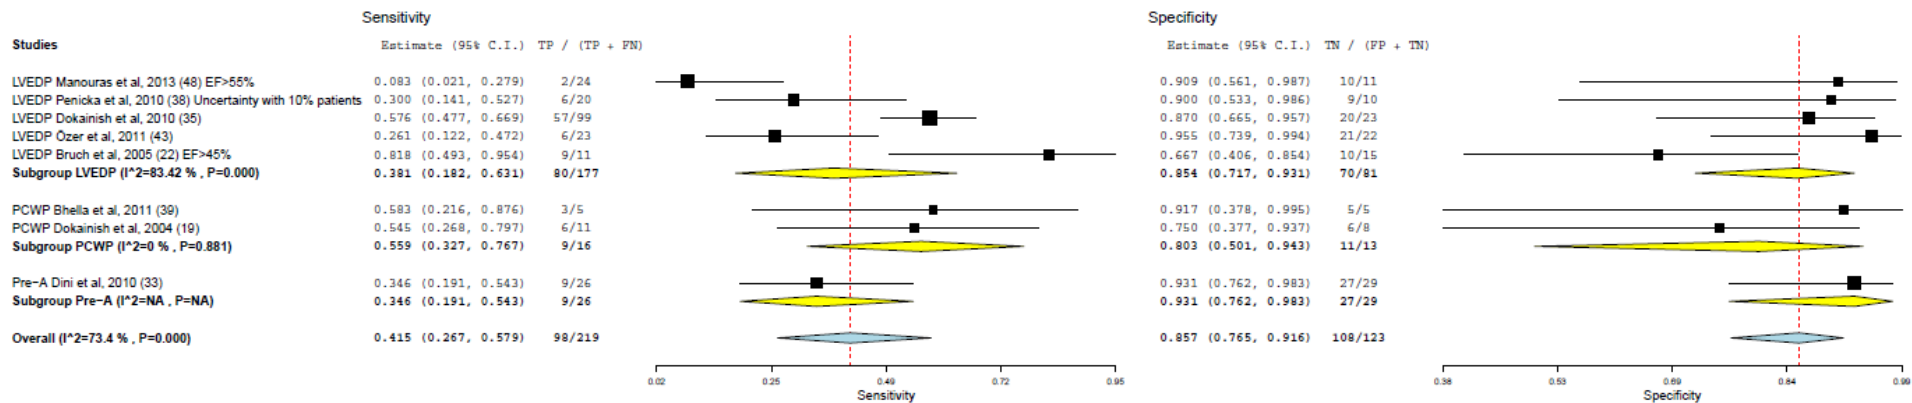

### HSROC analysis

LVEDP studies (n=4)  
 Sensitivity (summary) 0.39 (0.07 - 073)  
 Specificity (summary) 0.88 (0.69 – 0.99)

All studies combined (n=8)  
 Sensitivity (summary) 0.42 (0.19 - 0.65)  
 Specificity (summary) 0.89 (0.77- 0.98)

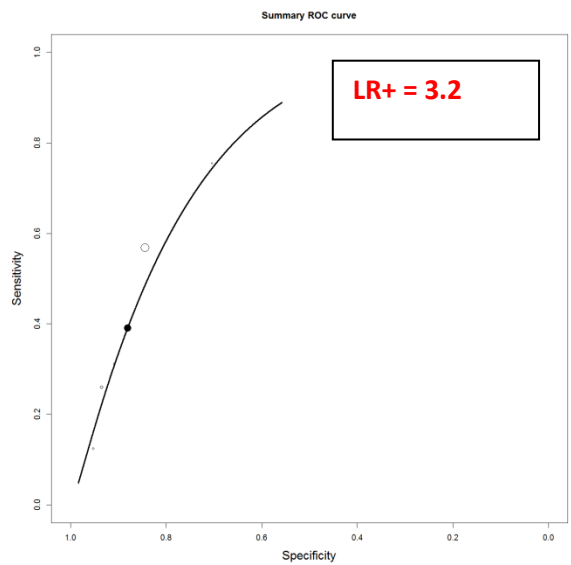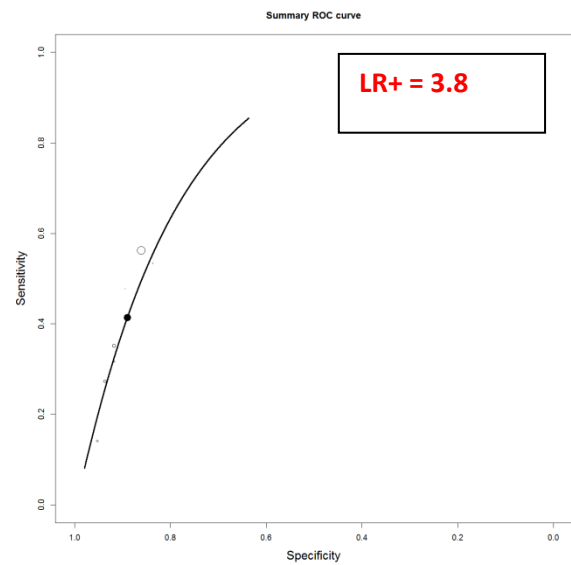

There are insufficient number of studies that measured PCWP (n=2) to perform a meaningful analysis.

## D. PRIMARY DATA SUMMARY - Primary studies only (Simultaneous and Not Simultaneous)

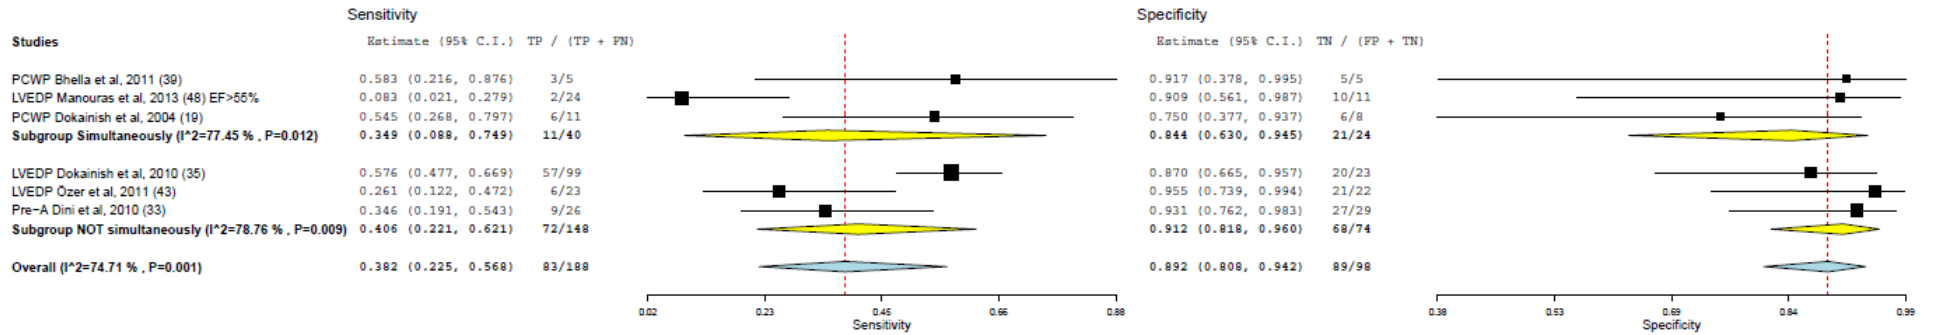

### HSROC analysis

Primary Simultaneous studies (n=3)  
 Sensitivity (summary) 0.33 (0.03 – 0.77)  
 Specificity (summary) 0.88 (0.53 – 1.0)

Primary NOT Simultaneous studies (n=3)  
 Sensitivity (summary) 0.39 (0.07 – 0.73)  
 Specificity (summary) 0.92 (0.71 – 1.0)

All Primary studies (n=6)  
 Sensitivity (summary) 0.37 (0.13 - 0.61)  
 Specificity (summary) 0.91 (0.81 – 0.99)

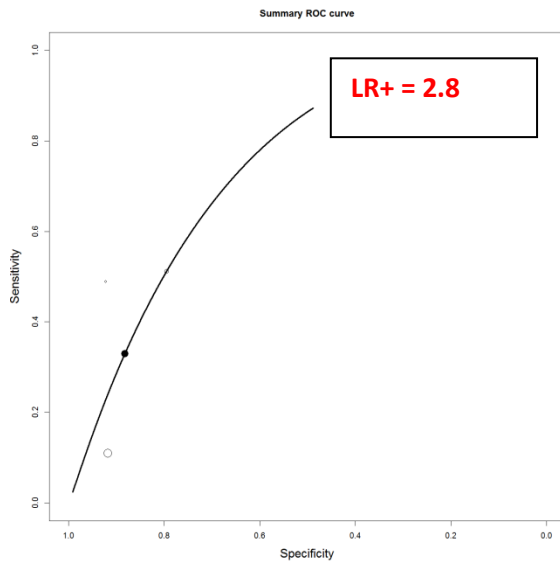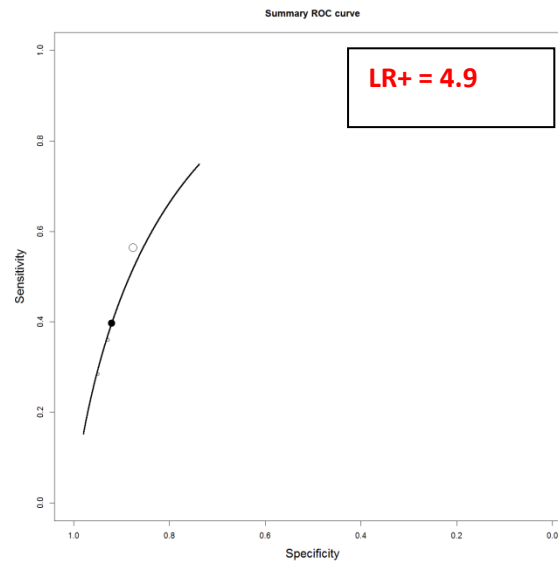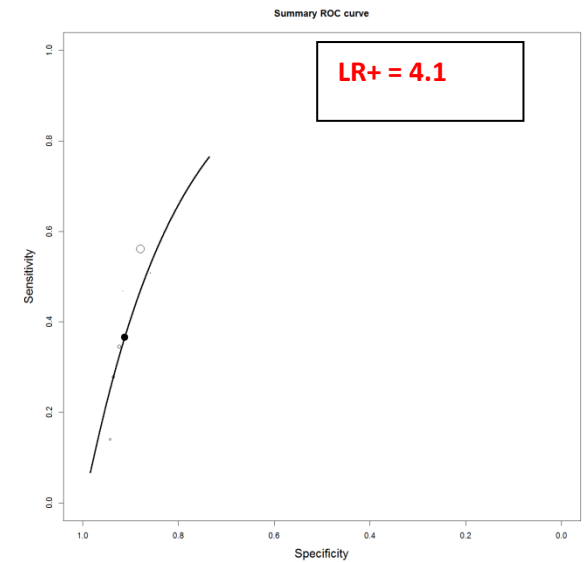

### 6.3. Subgroup analysis for $E/e'_{\text{septal}} >15$ to identify elevated LVFP

#### $E/e'_{\text{septal}}$ : Dataset for subgroup analysis (see also Tables 1 and 2)

| study                                                        | TP | FN | FP | TN | SENS.        | lower | upper | SPEC.        | lower | upper | Data      | Timing          | % HFpEF | % CAD    | % HTN    | % DM    | Indication for cath | LR+  |
|--------------------------------------------------------------|----|----|----|----|--------------|-------|-------|--------------|-------|-------|-----------|-----------------|---------|----------|----------|---------|---------------------|------|
| PCWP Rivas-Gotz et al, 2003 (18)                             | 12 | 24 | 1  | 15 | <b>0.333</b> | 0.200 | 0.500 | <b>0.937</b> | 0.665 | 0.99  | Primary   | Simultaneously  | Unclear | Unclear  | Unclear  | Unclear | ICU/Cath lab        | 5.3  |
| LVMDP Ommen et al, 2000 (15)                                 | 4  | 14 | 0  | 43 | <b>0.237</b> | 0.097 | 0.472 | <b>0.989</b> | 0.843 | 1.00  | Primary   | Simultaneously  | Unclear | Unclear  | Unclear  | Unclear | Unclear             | 21.5 |
| LVMDP Rudko et al, 2008 (32)                                 | 2  | 16 | 0  | 25 | <b>0.132</b> | 0.039 | 0.364 | <b>0.981</b> | 0.756 | 1.00  | Primary   | Simultaneously  | ~20% HF | ~80% CAD | ~50% HTN | Unclear | Unclear             | 6.9  |
| LVEDP Özer et al, 2011 (43)                                  | 7  | 16 | 1  | 21 | <b>0.304</b> | 0.153 | 0.515 | <b>0.955</b> | 0.739 | 0.99  | Primary   | NOT simultaneou | unclear | all CAD  | ~60% HTN | ~40% DM | angiography         | 6.8  |
| LVEDP Penicka et al, 2010 (38) Uncertainty with 10% patients | 4  | 16 | 0  | 10 | <b>0.214</b> | 0.088 | 0.436 | <b>0.955</b> | 0.552 | 1.00  | Supplemen | Simultaneously  | ~70% HF | no CAD   | ~70% HTN | ~30% DM | dyspnea             | 4.8  |

LVFP=left ventricular filling pressure; LVEDP=left ventricular end diastolic pressure; LVMDP=left ventricular mean diastolic pressure; Pre-A DP=left ventricular pre-A wave diastolic pressure; PCWP=pulmonary capillary wedge pressure; CI=confidence interval; HFpEF=heart failure with preserved Ejection Fraction; CAD=coronary artery disease; HTN=hypertension; DM=diabetes mellitus; ICU=intensive care unit; TP=true positive; FP= false positive; FN= false negative; TN=true negative; Sens.= sensitivity; Spec.=specificity; LR+=positive likelihood ratio. Studies are identified by the first author, year of publication, and reference number (in brackets) as cited in the main text.

## A. Combined LVFP (primary and supplemental data)

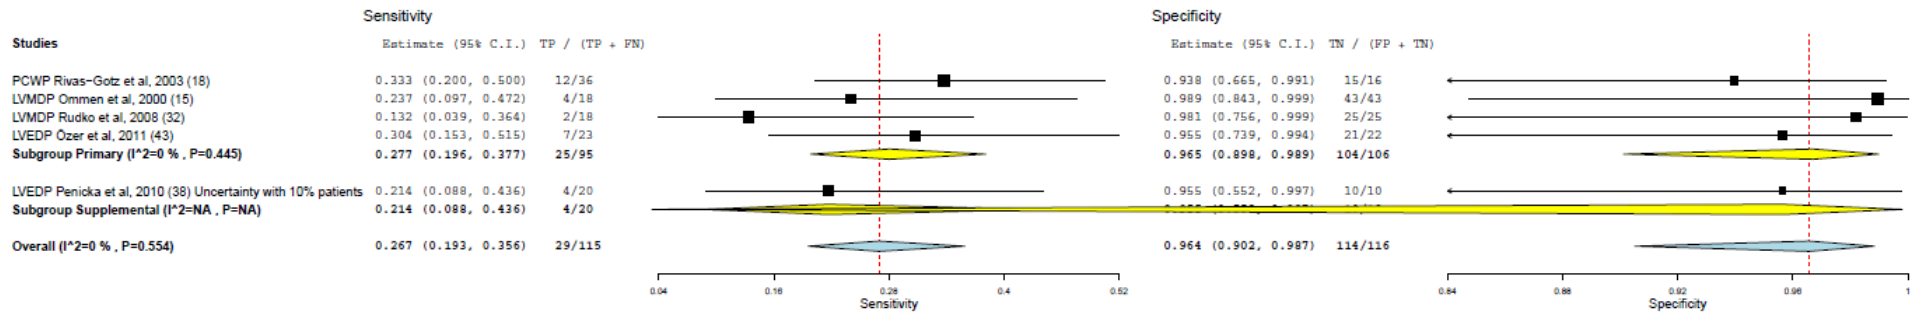

### HSROC analysis

Primary studies (n=4)

Sensitivity (summary) 0.24 (0.06 – 0.46)

Specificity (summary) 0.98 (0.92 – 1.0)

All studies (n=5)

Sensitivity (summary) 0.23 (0.10 - 0.39)

Specificity (summary) 0.98 (0.94 – 1.0)

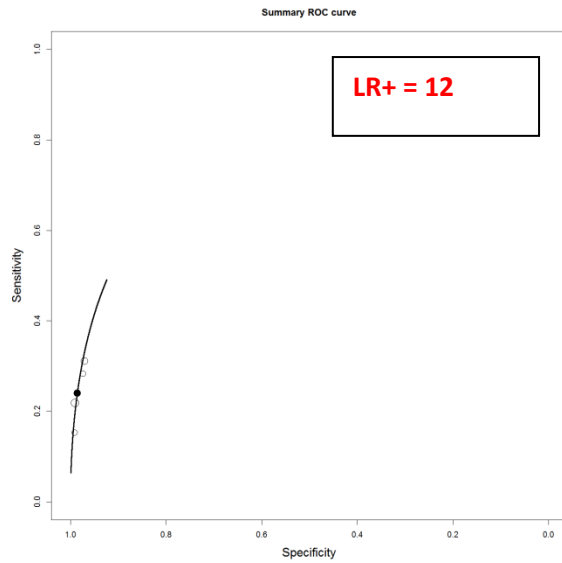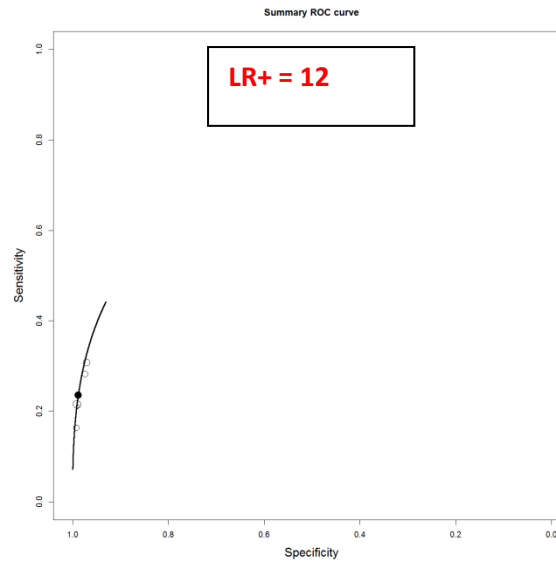

TP=true positive; FP= false positive; FN= false negative; TN=true negative; Sens.= sensitivity; Spec.=specificity; LR+=positive likelihood ratio; HSROC=hierarchical summary receiver operating characteristic. Heterogeneity amongst the studies was estimated by I<sup>2</sup> statistic. Studies are identified by the first author, year of publication, and reference number (in brackets) as cited in the main text. OpenMetaAnalyst software (12) for Windows (64-bit version) was used for statistical analysis including graphical presentations of forest plots.

## B. Combined LVFP (Simultaneous and not simultaneous measurements)

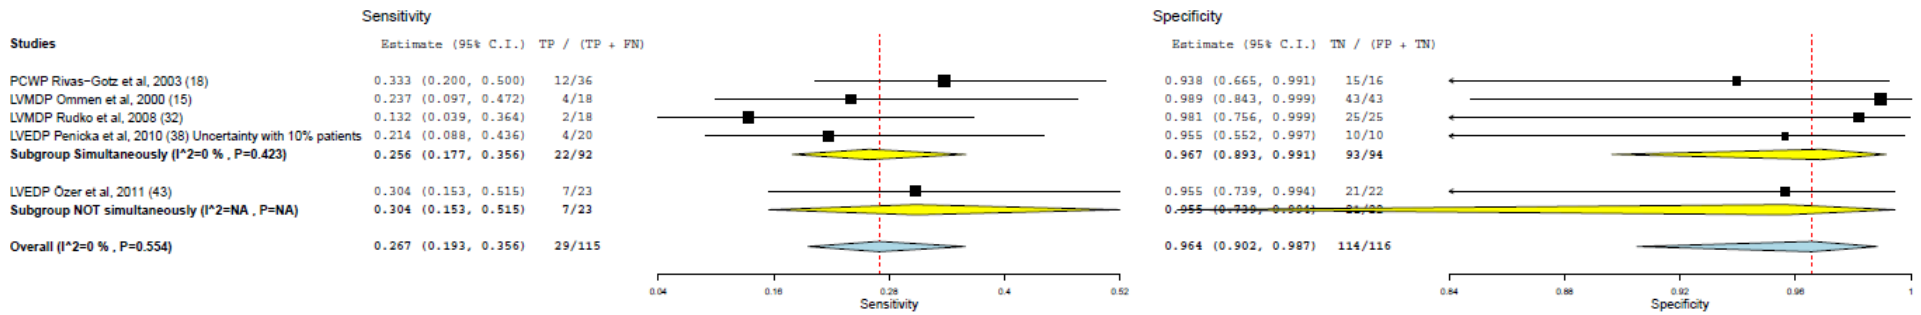

### HSROC analysis

Simultaneous studies (n=4)

Sensitivity (summary) 0.22 (0.08 – 0.44)

Specificity (summary) 0.98 (0.93 – 1.0)

All studies (n=5)

Sensitivity (summary) 0.23 (0.10 - 0.39)

Specificity (summary) 0.98 (0.94 – 1.0)

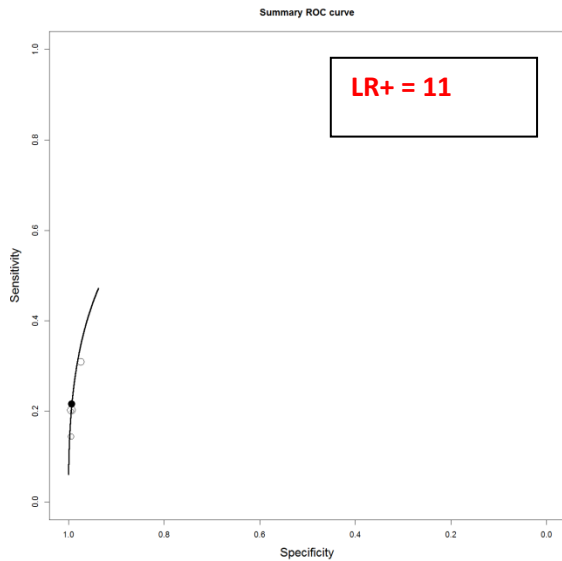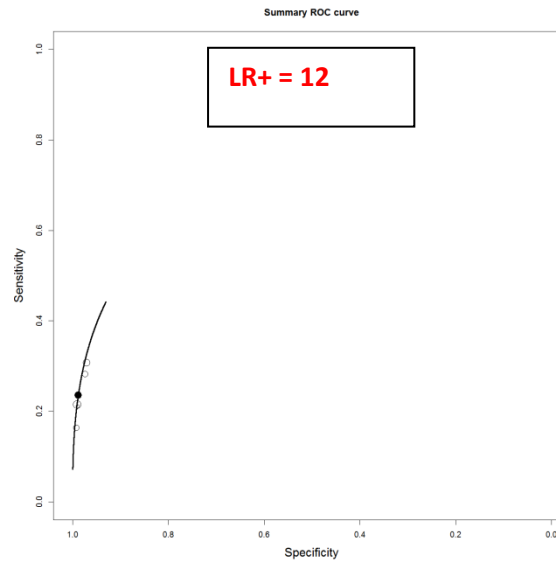



### C. Separate analysis for LVFP measurements

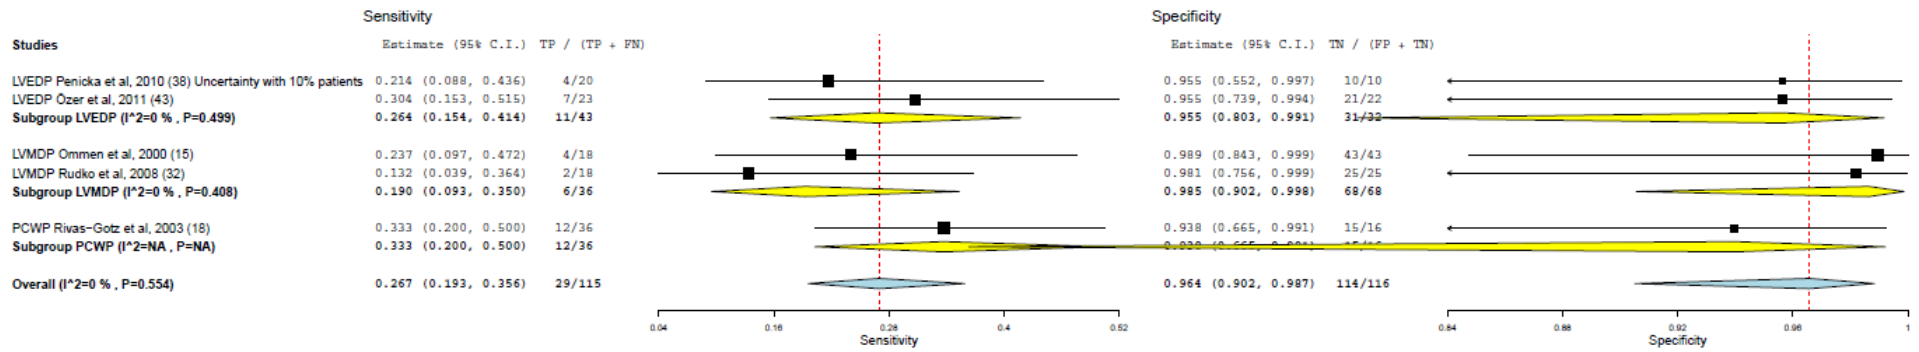

HSROC analysis

There are insufficient number of studies that measured LVEDP (n=2) or LVDP (n=2) to perform a meaningful analysis.

## D. PRIMARY DATA SUMMARY - Primary studies only (Simultaneous and Not Simultaneous)

### Simultaneous studies

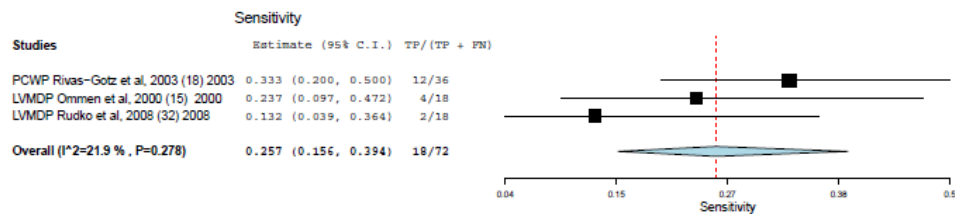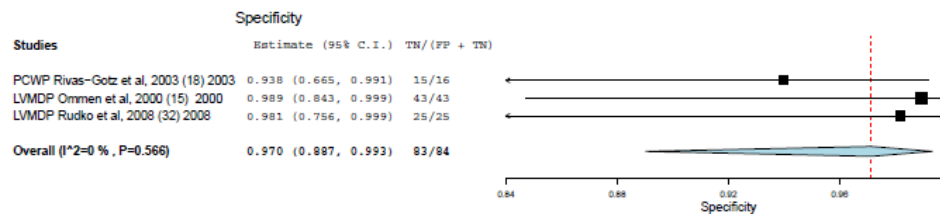

### All studies

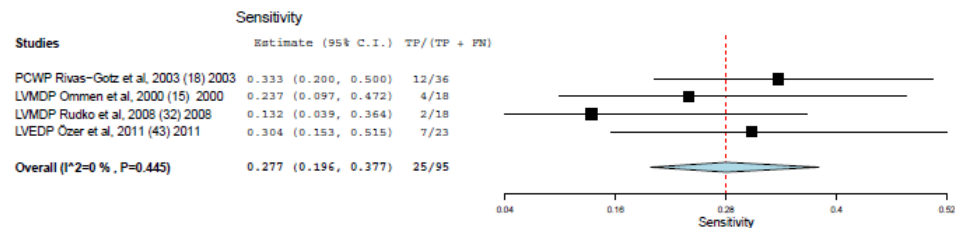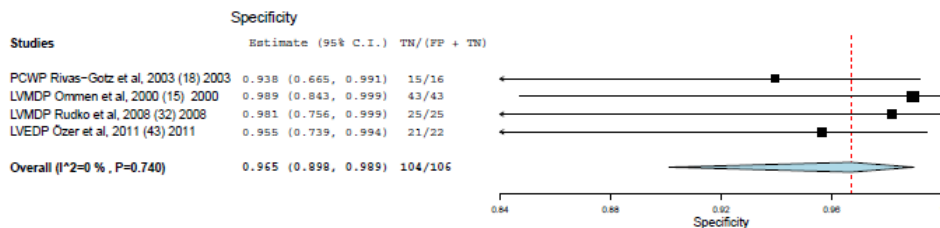

### HSROC analysis

All Primary studies (n=4)

Sensitivity (summary) 0.24 (0.06 – 0.46)

Specificity (summary) 0.98 (0.92 – 1.0)

Primary Simultaneous studies (n=3)

Sensitivity (summary) 0.22 (0.04 – 0.54)

Specificity (summary) 0.98 (0.87 – 1.0)

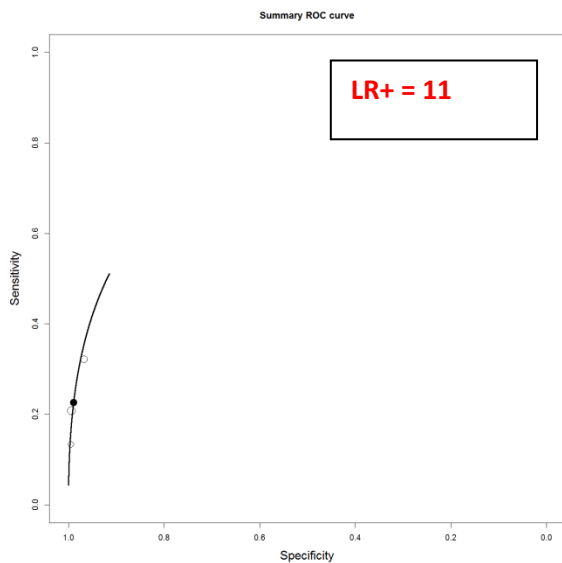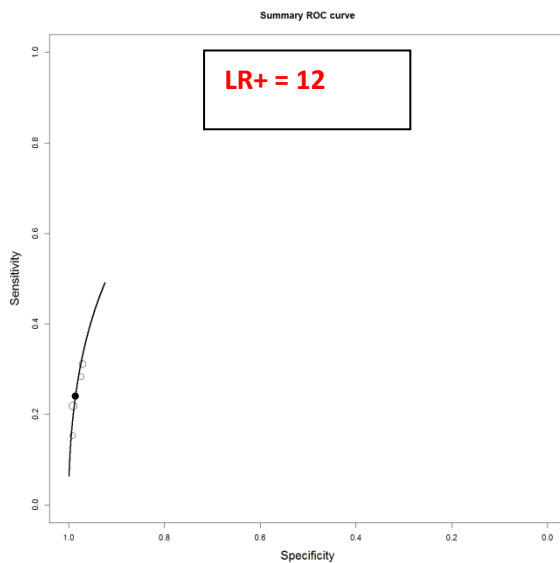

## APPENDIX 7

### Optimal cutoffs and AUC for elevated LVFP

#### 7.1. Identification of elevated LVFP based on 'optimal' E/e'<sub>mean</sub> cutoffs from ROC analysis

##### LVEF<sub>≥</sub>50%

| Study                      | N     | LVFP cutoff           | E/e' cutoff | Prev. (%) | TP | FP | FN | TN | Sens. (95% CI)   | Spec. (95% CI)   | Sens. (95% CI) | Spec. (95% CI) | AUC (95% CI)     |
|----------------------------|-------|-----------------------|-------------|-----------|----|----|----|----|------------------|------------------|----------------|----------------|------------------|
| Kidawa, 2005 (24)          | 50    | LVEDP <sub>≥</sub> 15 | >8          | 54        | -  | -  | -  | -  | 0.76             | 0.76             |                |                | -                |
| Hadano, 2005* (23)         | 63/65 | LVEDP>16              | >9          | 19        | 10 | 11 | 5  | 37 | 0.67[0.41, 0.85] | 0.77[0.63, 0.87] |                |                | 0.81             |
| Previtali, 2012* (46)      | 62/57 | LVEDP>16              | >9          | 61        | 24 | 13 | 14 | 11 | 0.63[0.46, 0.78] | 0.46[0.26, 0.67] |                |                | 0.47             |
| Arques 2013 (47)           | 36    | LVEDP>16              | >6.6        | 58        | 15 | 3  | 6  | 12 | 0.71[0.49, 0.87] | 0.80[0.53, 0.93] |                |                | 0.79             |
| Rivas-Gotz, 2003 (18)      | 55    | PCWP >15              | >10         | -         | -  | -  | -  | -  | 0.79             | 0.80             |                |                | -                |
| Hadano, 2005* (23)         | 63/65 | PCWP >12              | >9          | 19        | 9  | 12 | 3  | 39 | 0.75[0.43, 0.95] | 0.76[0.63, 0.87] |                |                | 0.81             |
| Nagueh, 1997* (E/A<1) (13) | 23/26 | PCWP >12              | >8          | 22        | 4  | 10 | 1  | 8  | 0.80[0.29, 0.99] | 0.44[0.22, 0.69] |                |                | 0.64             |
| Maeder, 2011 (42)          | 36    | PCWP >12              | -           | 25        | -  | -  | -  | -  | -                | -                | -              | -              | 0.54[0.32, 0.77] |
| Mansencal, 2004* (20)      | 20/20 | Pre-A >15             | >6          | 25        | 5  | 6  | 0  | 9  | 1.00[0.48, 1.00] | 0.60[0.32, 0.84] |                |                | 0.79             |
| Hsiao, 2011 (40)           | 100   | Pre-A >15             | >9.7        | -         | -  | -  | -  | -  | 64               | 63               |                |                | -                |

##### LVEF<sub>≥</sub>40%

| Study               | N     | LVFP cutoff | E/e' cutoff | Prev. (%) | TP | FP | FN | TN | Sens. (95% CI)   | Spec. (95% CI)   | Sens. (95% CI) | Spec. (95% CI) | AUC (95% CI)      |
|---------------------|-------|-------------|-------------|-----------|----|----|----|----|------------------|------------------|----------------|----------------|-------------------|
| Poerner, 2007 (28)  | 176   | LVEDP>16    | >10         | 41        | 48 | 37 | 24 | 67 | 0.67[0.55, 0.77] | 0.64[0.54, 0.74] |                |                | 0.69              |
| Jaubert, 2010 (36)  | 59    | LVEDP>16    | >6.7        | 66        | 22 | 4  | 17 | 16 | 0.56[0.40, 0.72] | 0.80[0.56, 0.94] |                |                | 0.69[0.56, 0.80]  |
| Manouras, 2013 (48) | 65    | LVEDP>16    | >8          | 72        | -  | -  | -  | -  | 0.73             | 0.65             |                |                | 0.70[0.63, 0.77]  |
| Nagueh, 1998* (14)  | 43/49 | PCWP >12    | >9          | 60        | 20 | 3  | 6  | 14 | 0.77[0.56, 0.91] | 0.82[0.57, 0.96] |                |                | 0.84              |
| Manouras, 2013 (48) | 65    | Pre-A >12   | >8          | 68        | 33 | 7  | 11 | 14 | 0.74[0.60, 0.85] | 0.67[0.45, 0.83] |                |                | 0.71 [0.62, 0.79] |

LVFP=left ventricular filling pressure; LVEDP=left ventricular end diastolic pressure; LVMDP=left ventricular mean diastolic pressure; Pre-A DP=left ventricular pre-A wave diastolic pressure; PCWP=pulmonary capillary wedge pressure; Prev.=Prevalence of patients with elevated LVFP; TP=true positive; FP=false positive; FN=false negative; TN=true negative; Sens.=Sensitivity; Spec.=Specificity; AUC=area under receiver operating characteristic (ROC) curve; CI=confidence interval. Empty cells are due to no data available.

\*=TP, FP, FN, TN values were extracted from the graphical data representation of LVFP vs. E/e' in study results; for such study, column presenting patient number (N) include 2 numbers: first number is actual counted patients in the plot, and second number is total patients in the study group.

In studies that did not provide the optimal cutoff, we created ROC curve and identified the optimal cutoff as the point on the ROC curve closest to (0, 1 on x-y coordinate).

Studies are identified by the first author, year of publication, and reference number (in brackets) as cited in the main text.

## 7.2. Identification of elevated LVFP based on 'optimal' E/e' mean cutoffs from ROC analysis

### LVEF<sub>≥</sub>50%

| Study                     | N     | LVFP cutoff           | E/e' cutoff | Prev. (%) | TP FP FN TN | Sens. (95% CI)   | Spec. (95% CI)   | Sens. (95% CI) | Spec. (95% CI) | AUC (95% CI)     |
|---------------------------|-------|-----------------------|-------------|-----------|-------------|------------------|------------------|----------------|----------------|------------------|
| Dokainish, 2010 (35)      | 122   | LVEDP <sub>≥</sub> 20 | >12         | 56        | - - - -     | 0.75             | 0.78             |                |                | 0.79             |
| Previtali, 2012 (46)      | 57    | LVEDP>15              | >12.08      | 72        | - - - -     | 0.44             | 0.71             |                |                | 0.52             |
| Rivas-Gotz, 2003 (18)     | 55    | PCWP >15              | >10         | -         | -           | 0.82             | 0.72             |                |                | -                |
| Dokainish, 2004* (19)     | 19    | PCWP >15              | >11         | 47        | 7 2 2 8     | 0.78[0.40, 0.97] | 0.80[0.44, 0.97] |                |                | -                |
| Maeder, 2011 (42)         | 36    | PCWP >12              | -           | 25        | -           | -                | -                |                |                | 0.62[0.39, 0.85] |
| Bhella et al., 2011* (39) | 10/10 | PCWP >12              | >10         | 50        | 4 1 1 4     | 0.80[0.28, 0.99] | 0.80[0.28, 0.99] |                |                | 0.78             |
| Dokainish, 2008 (30)      | 32    | Pre-A >15             | >15         | -         | -           | 73               | 77               |                |                | -                |
| Dokainish, 2010 (34)      | 122   | Pre-A ≥15             | >13         | 56        | - - - -     | 0.70             | 0.93             |                |                | 0.82             |
| Hsiao, 2011 (40)          | 100   | Pre-A >15             | >11         | -         | -           | 60               | 60               |                |                | -                |
| Hsiao, 2012 (12)          | 376   | Pre-A >15             | >11         | -         | -           | 66               | 64               |                |                | 0.72[0.67, 0.77] |
| Manouras, 2013* (48)      | 35/38 | Pre-A >12             | >8          | 69        | 12 4 12 7   | 0.50[0.31, 0.69] | 0.64[0.34, 0.86] |                |                | 0.55             |

### LVEF<sub>≥</sub>40%

| Study                | N     | LVFP cutoff           | E/e' cutoff | Prev. (%) | TP FP FN TN | Sens. (95% CI)   | Spec. (95% CI)   | Sens. (95% CI) | Spec. (95% CI) | AUC (95% CI)     |
|----------------------|-------|-----------------------|-------------|-----------|-------------|------------------|------------------|----------------|----------------|------------------|
| Bruch, 2005 (22)     | 28    | LVEDP <sub>≥</sub> 15 | >11         | n/a       | -           | 0.94             | 0.90             |                |                | 0.98[0.96, 1.00] |
| Ng, 2008 (31)        | 20    | LVEDP <sub>≥</sub> 12 | -           | 60        | -           | -                | -                |                |                | 0.69             |
| Manouras, 2013 (48)  | 65    | LVEDP>16              | >9          | 72        | -           | -                | -                |                |                | 0.66[0.58, 0.74] |
| Manouras, 2013* (48) | 62/65 | Pre-A >12             | >8          | 71        | 28 8 16 10  | 0.64[0.48, 0.78] | 0.56[0.31, 0.78] |                |                | 0.70[0.61, 0.79] |

LVFP=left ventricular filling pressure; LVEDP=left ventricular end diastolic pressure; LVMDP=left ventricular mean diastolic pressure; Pre-A DP=left ventricular pre-A wave diastolic pressure; PCWP=pulmonary capillary wedge pressure; Prev.=Prevalence of patients with elevated LVFP; TP=true positive; FP=false positive; FN=false negative; TN=true negative; Sens.=Sensitivity; Spec.=Specificity; AUC=area under receiver operating characteristic (ROC) curve; CI=confidence interval. Empty cells are due to no data available.

\*=TP, FP, FN, TN values were extracted from the graphical data representation of LVFP vs. E/e' in study results; for such study, column presenting patient number (N) include 2 numbers: first number is actual counted patients in the plot, and second number is total patients in the study group.

In studies that did not provide the optimal cutoff, we created ROC curve and identified the optimal cutoff as the point on the ROC curve closest to (0, 1 on x-y coordinate).

Studies are identified by the first author, year of publication, and reference number (in brackets) as cited in the main text.

### 7.3. Identification of elevated LVFP based on 'optimal' E/e'<sub>septal</sub> cutoffs from ROC analysis

#### LVEF<sub>≥</sub>50%

| Study                       | N     | LVFP cutoff | E/e' cutoff | Prev. (%) | TP | FP | FN | TN | Sens. (95% CI)   | Spec. (95% CI)   | Sens. (95% CI) | Spec. (95% CI) | AUC (95% CI)     |
|-----------------------------|-------|-------------|-------------|-----------|----|----|----|----|------------------|------------------|----------------|----------------|------------------|
| Min, 2007* (8<E/e'<15) (27) | 55/55 | LVEDP>16    | >10         | 73        | 27 | 10 | 13 | 5  | 0.68[0.51, 0.81] | 0.33[0.12, 0.62] |                |                | 0.47             |
| Ozer, 2011 (43)             | 45    | LVEDP >16   | >9.62       | 51        | 12 | 2  | 11 | 20 | 0.52[0.31, 0.73] | 0.91[0.71, 0.99] |                |                | 0.69[0.62, 0.76] |
| Rivas-Gotz, 2003(18)        | 55    | PCWP >15    | >12         | -         | -  | -  | -  | -  | 0.70             | 0.60             |                |                | -                |
| Maeder, 2011 (42)           | 36    | PCWP >12    | -           | 25        | -  | -  | -  | -  | -                | -                |                |                | 0.66[0.44, 0.88] |
| Hsiao, 2011 (40)            | 100   | Pre-A >15   | >13.1       | -         | -  | -  | -  | -  | 64               | 61               |                |                | -                |
| Ommen, 2000* (15)           | 61/64 | LVMDP>12    | >11         | 30        | 15 | 15 | 3  | 28 | 0.83[0.59, 0.96] | 0.65[0.49, 0.79] |                |                | 0.79             |
| Rudko, 2008* (32)           | 43/39 | LVMDP>12    | >9          | 42        | 14 | 6  | 4  | 19 | 0.78[0.52, 0.94] | 0.76[0.55, 0.91] |                |                | 0.75             |

LVFP=left ventricular filling pressure; LVEDP=left ventricular end diastolic pressure; LVMDP=left ventricular mean diastolic pressure; Pre-A DP=left ventricular pre-A wave diastolic pressure; PCWP=pulmonary capillary wedge pressure; Prev.=Prevalence of patients with elevated LVFP; TP=true positive; FP=false positive; FN=false negative; TN=true negative; Sens.=Sensitivity; Spec.=Specificity; AUC=area under receiver operating characteristic (ROC) curve; CI=confidence interval. Empty cells are due to no data available.

\*=TP, FP, FN, TN values were extracted from the graphical data representation of LVFP vs. E/e' in study results; for such study, column presenting patient number (N) include 2 numbers: first number is actual counted patients in the plot, and second number is total patients in the study group.

In studies that did not provide the optimal cutoff, we created ROC curve and identified the optimal cutoff as the point on the ROC curve closest to (0, 1 on x-y coordinate).

Studies are identified by the first author, year of publication, and reference number (in brackets) as cited in the main text.

## APPENDIX 8

### Secondary analysis of sensitivity/specificity of E/e' cutoffs to predict normal LVFP

#### 8.1. Subgroup analysis for E/e'<sub>lateral</sub> <8 to identify normal LVFP

**E/e'<sub>lateral</sub>: Dataset for subgroup analysis (see also Tables 1 and 2)**

| study                                                         | TP | FN | FP | TN | SENS.        | lower | upper | SPEC.        | lower | upper | Data      | Timing           | % HFpEF | % CAD    | % HTN    | % DM    | Indication for cath | LR+ |
|---------------------------------------------------------------|----|----|----|----|--------------|-------|-------|--------------|-------|-------|-----------|------------------|---------|----------|----------|---------|---------------------|-----|
| LVEDP Kidawa et al, 2005 (24)                                 | 19 | 7  | 4  | 15 | <b>0.731</b> | 0.533 | 0.866 | <b>0.789</b> | 0.554 | 0.919 | Primary   | Simultaneously   | unclear | unclear  | unclear  | unclear | angiography         | 3.5 |
| PCWP Rivas-Gotz et al, 2003 (18)                              | 12 | 4  | 6  | 29 | <b>0.750</b> | 0.492 | 0.903 | <b>0.829</b> | 0.667 | 0.921 | Primary   | Simultaneously   | unclear | unclear  | unclear  | unclear | ICU/Cath            | 4.4 |
| LVEDP Hadano et al, 2005 (23)                                 | 35 | 16 | 3  | 9  | <b>0.686</b> | 0.548 | 0.798 | <b>0.750</b> | 0.448 | 0.917 | Primary   | NOT simultaneous | unclear | some CAD | unclear  | unclear | unclear             | 2.7 |
| LVEDP Previtali et al, 2012 (46)                              | 6  | 18 | 13 | 25 | <b>0.250</b> | 0.117 | 0.456 | <b>0.658</b> | 0.496 | 0.790 | Primary   | NOT simultaneous | 0% HF   | unclear  | unclear  | unclear | unclear             | 0.7 |
| Pre-A Mansencal et al, 2004 (20)                              | 12 | 3  | 3  | 2  | <b>0.800</b> | 0.530 | 0.934 | <b>0.400</b> | 0.100 | 0.800 | Primary   | NOT simultaneous | ~5% HF  | all CAD  | ~10% HTN | unclear | angiography         | 1.3 |
| LVEDP Penicka et al, 2010 (38) Uncertainty with 10% patients  | 6  | 4  | 8  | 12 | <b>0.600</b> | 0.297 | 0.842 | <b>0.600</b> | 0.380 | 0.786 | Supplemer | Simultaneously   | ~70% HF | no CAD   | ~70% HTN | ~30% DM | dyspnea             | 1.5 |
| PCWP Nagueh et al, 1998 (14) EF>45% Sinus Tachycardia >100bpm | 12 | 5  | 6  | 20 | <b>0.706</b> | 0.458 | 0.872 | <b>0.769</b> | 0.572 | 0.892 | Supplemer | Simultaneously   | unclear | unclear  | unclear  | unclear | ICU/Cath            | 3.1 |
| LVEDP Poerner et al, 2007 (28) EF>~40%                        | 21 | 72 | 6  | 42 | <b>0.226</b> | 0.152 | 0.322 | <b>0.875</b> | 0.748 | 0.943 | Supplemer | NOT simultaneous | unclear | some CAD | ~60% HTN | ~30% DM | angiography         | 1.8 |

LVFP=left ventricular filling pressure; LVEDP=left ventricular end diastolic pressure; LVMDP=left ventricular mean diastolic pressure; Pre-A DP=left ventricular pre-A wave diastolic pressure; PCWP=pulmonary capillary wedge pressure; CI=confidence interval; HFpEF=heart failure with preserved Ejection Fraction; CAD=coronary artery disease; HTN=hypertension; DM=diabetes mellitus; ICU=intensive care unit; TP=true positive; FP= false positive; FN= false negative; TN=true negative; Sens.= sensitivity; Spec.=specificity; LR+=positive likelihood ratio. Studies are identified by the first author, year of publication, and reference number (in brackets) as cited in the main text.

### A. Combined LVFP (primary and supplemental data)

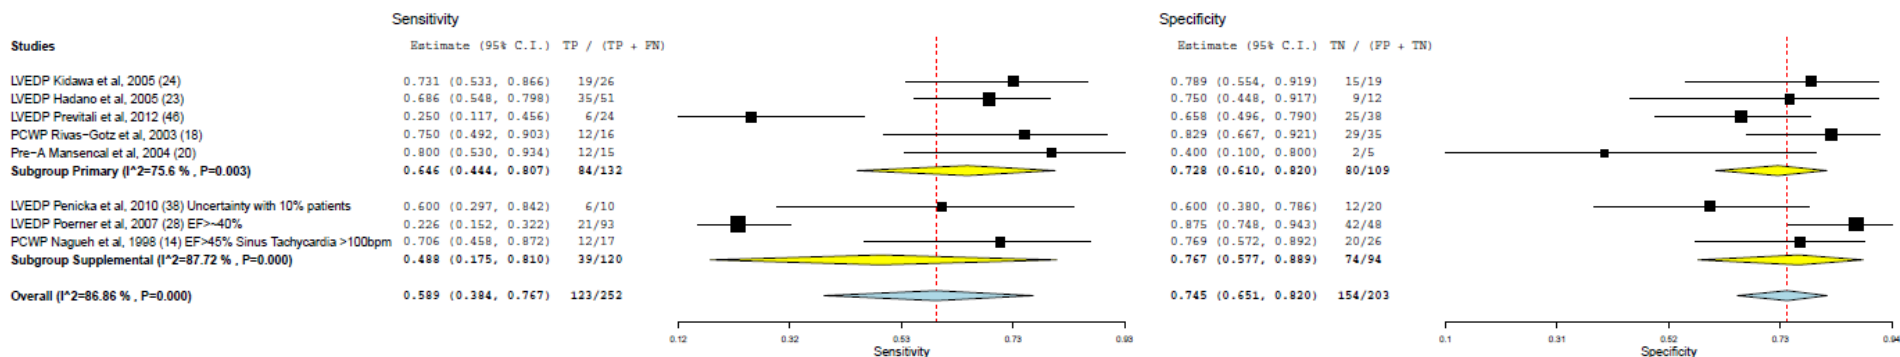

### HSROC analysis

Primary studies combined (n=5, as in Figure 4)  
 Sensitivity (summary) 0.64 (0.37 - 0.87)  
 Specificity (summary) 0.73 (0.54 - 0.89)

Supplemental studies combined (n=3)  
 Sensitivity (summary) 0.49 (0.10 - 0.93)  
 Specificity (summary) 0.76 (0.41 - 1.0)

All studies combined (n=8)  
 Sensitivity (summary) 0.58 (0.38 - 0.78)  
 Specificity (summary) 0.74 (0.61 - 0.87)

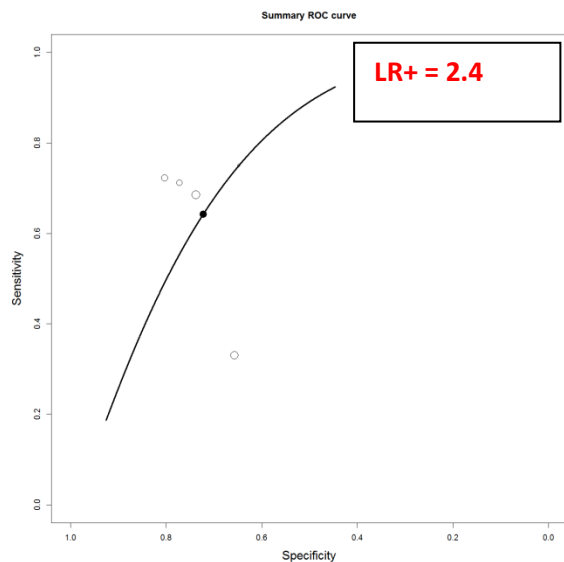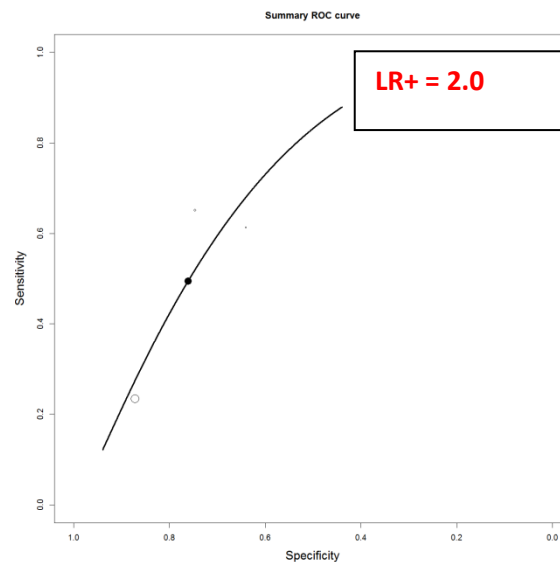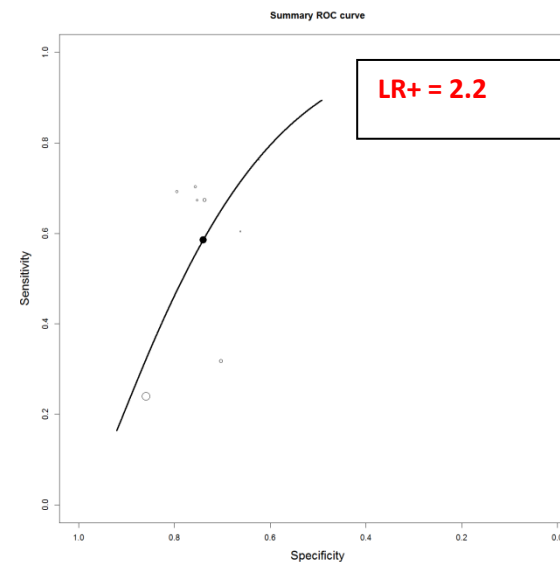

TP=true positive; FP= false positive; FN= false negative; TN=true negative; Sens.= sensitivity; Spec.=specificity; LR+=positive likelihood ratio; HSROC=hierarchical summary receiver operating characteristic. Heterogeneity amongst the studies was estimated by I2 statistic. Studies are identified by the first author, year of publication, and reference number (in brackets) as cited in the main text. OpenMetaAnalyst software (12) for Windows (64-bit version) was used for statistical analysis including graphical presentations of forest plots.

## B. Combined LVFP (Simultaneous and not simultaneous measurements)

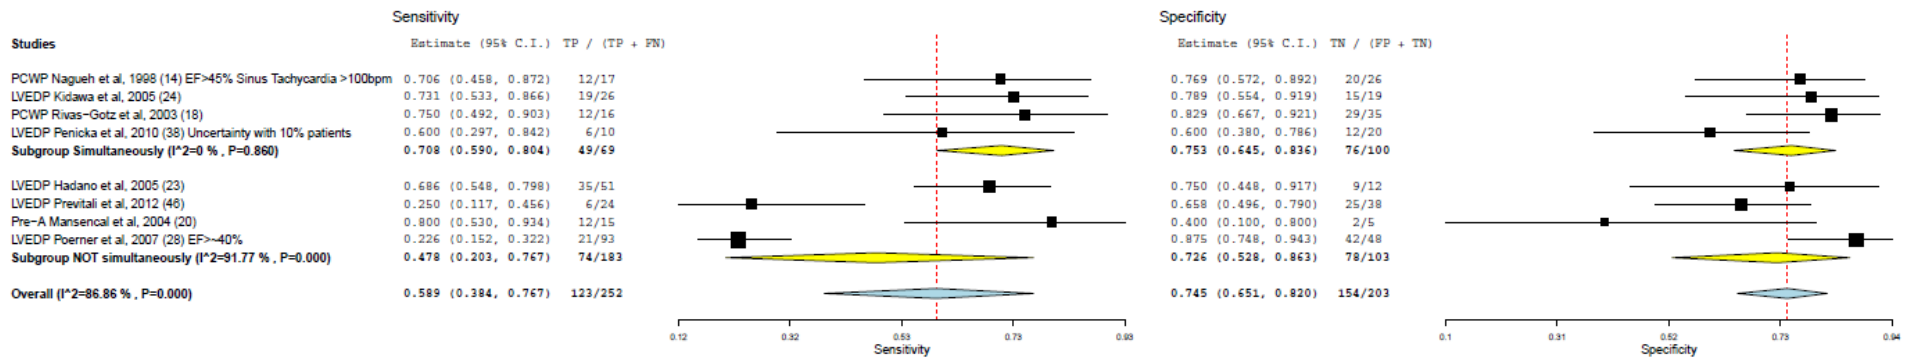

### HSROC analysis

Simultaneous studies combined (n=4)  
 Sensitivity (summary) 0.70 (0.49 - 0.86)  
 Specificity (summary) 0.75 (0.58 - 0.88)

Not Simultaneous studies combined (n=4)  
 Sensitivity (summary) 0.48 (0.08 - 0.88)  
 Specificity (summary) 0.71 (0.39 - 0.97)

All studies combined (n=8)  
 Sensitivity (summary) 0.58 (0.38 - 0.78)  
 Specificity (summary) 0.74 (0.61 - 0.87)

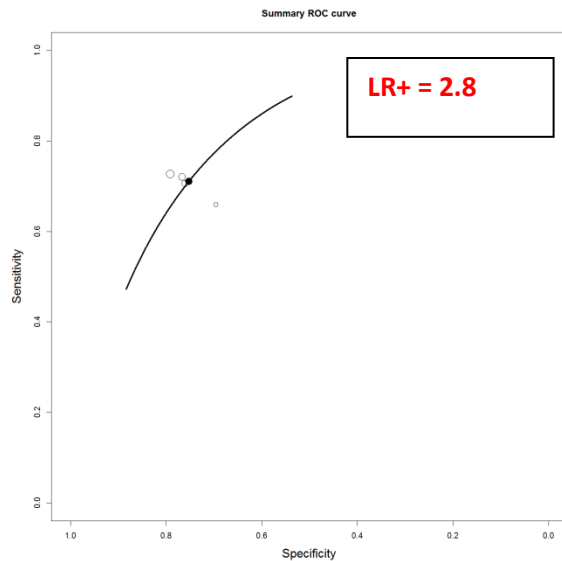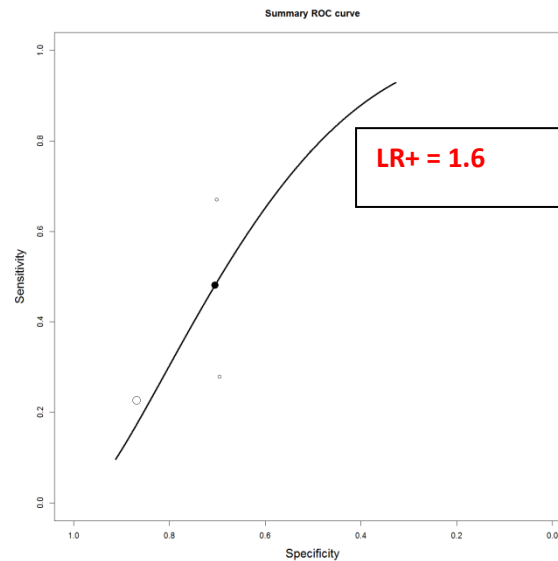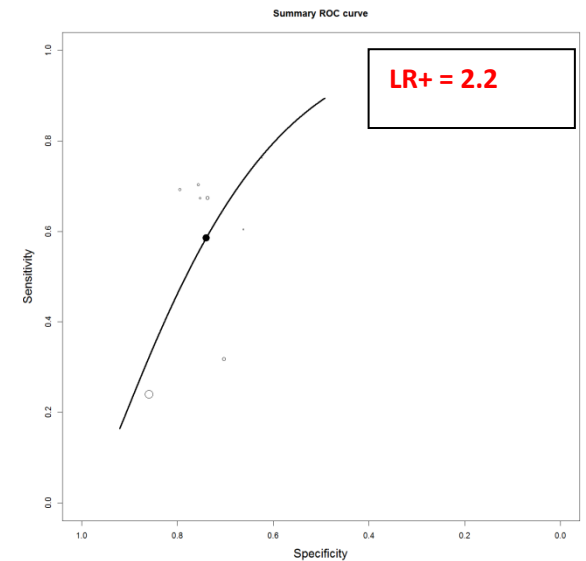



### C. Separate analysis for LVFP measurements

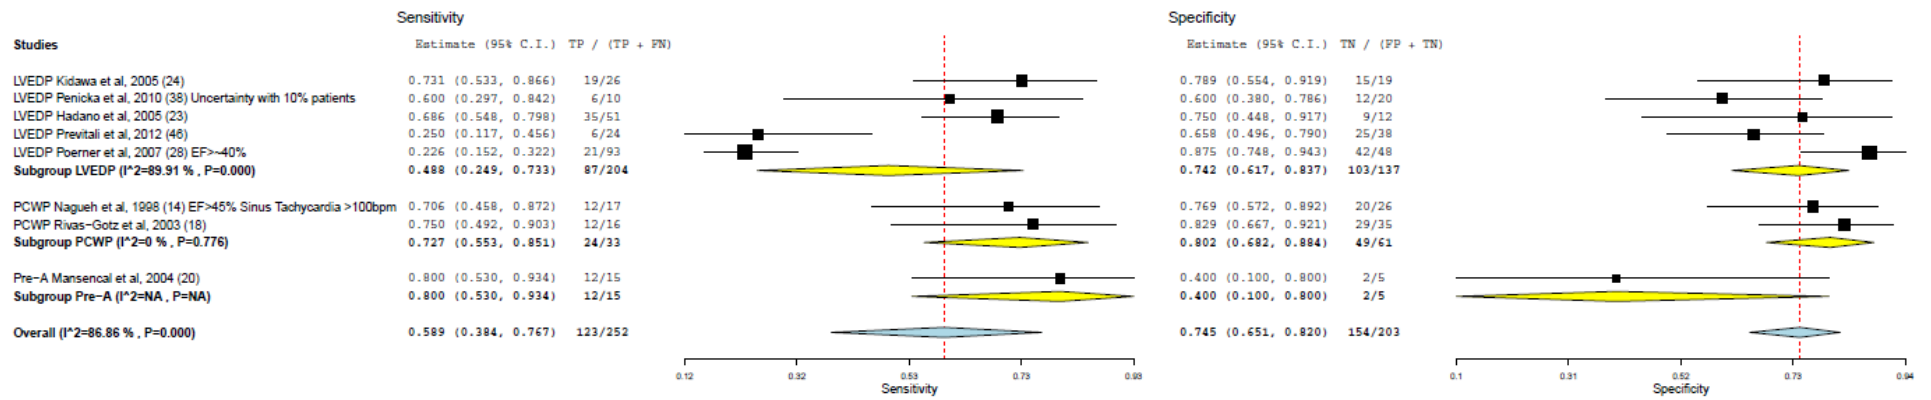

#### HSROC analysis

LVEDP studies combined (n=5)

Sensitivity (summary) 0.49 (0.19 - 0.80)

Specificity (summary) 0.74 (0.52 - 0.92)

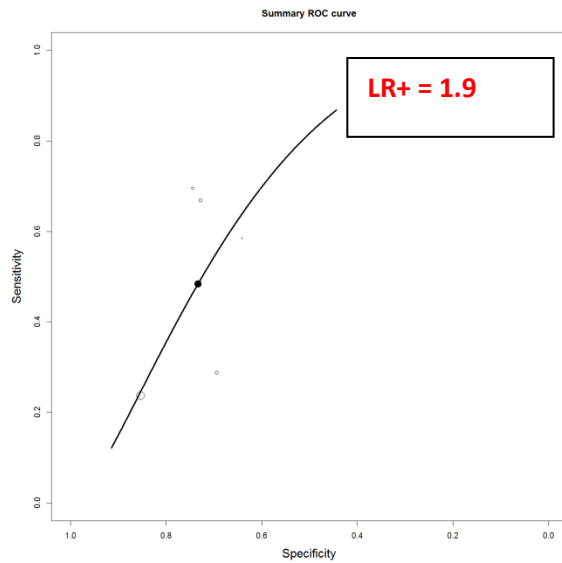

All studies combined (n=8)

Sensitivity (summary) 0.58 (0.38 - 0.78)

Specificity (summary) 0.74 (0.61- 0.87)

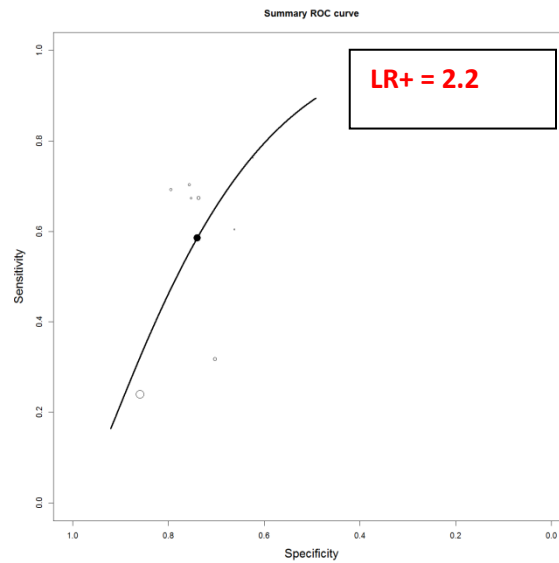

There are insufficient number of studies (n=2) that measured PCWP measurements to perform a meaningful analysis.

## D. PRIMARY DATA SUMMARY - Primary studies only (Simultaneous and Not Simultaneous)

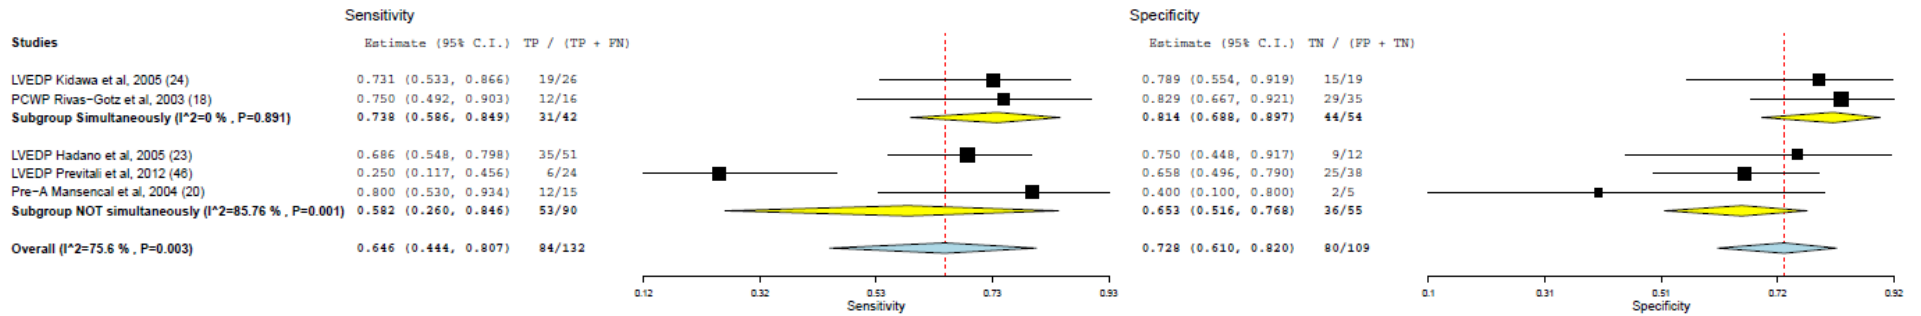

### HSROC analysis

Primary Not Simultaneous studies (n=3)  
 Sensitivity (summary) 0.58 (0.18 - 0.99)  
 Specificity (summary) 0.63 (0.24 - 0.96)

All primary studies combined (n=5)  
 Sensitivity (summary) 0.64 (0.37 - 0.87)  
 Specificity (summary) 0.73 (0.54 - 0.89)

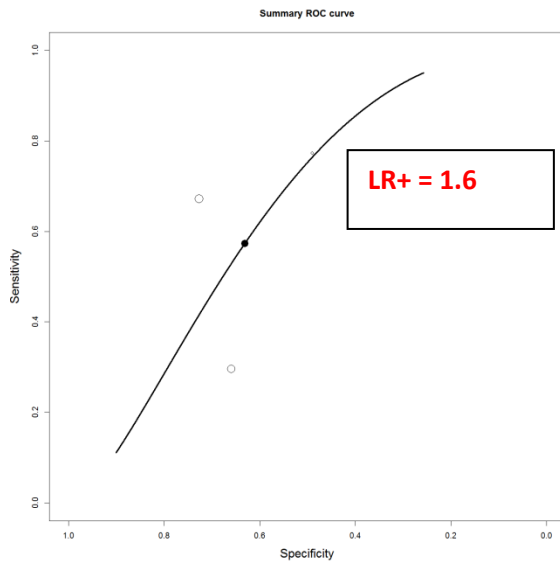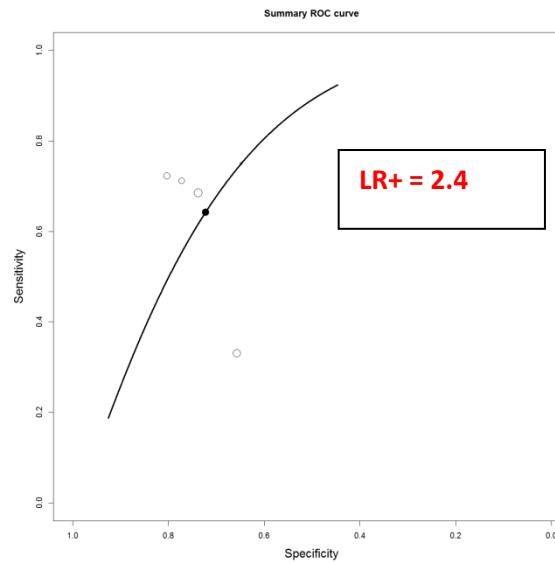

There are insufficient number of studies (n=2) with simultaneous measurements to perform a meaningful analysis.

## 8.2. Subgroup analysis for $E/e'_{\text{mean}} < 8$ to identify normal LVFP

$E/e'_{\text{mean}}$ : Dataset for subgroup analysis (see also Tables 1 and 2)

| study                                                        | TP | FN | FP | TN | SENS.        | lower | upper | SPEC.        | lower | upper | Data      | Timing           | % HFpEF | % CAD    | % HTN    | % DM    | indication for ca | LR+ |
|--------------------------------------------------------------|----|----|----|----|--------------|-------|-------|--------------|-------|-------|-----------|------------------|---------|----------|----------|---------|-------------------|-----|
| LVEDP Manouras et al, 2013 (48) EF>55%                       | 7  | 4  | 12 | 12 | <b>0.636</b> | 0.339 | 0.857 | <b>0.500</b> | 0.310 | 0.690 | Primary   | Simultaneously   | unclear | no CAD   | unclear  | unclear | angiography       | 1.3 |
| PCWP Dokainish et al, 2004 (19)                              | 2  | 6  | 2  | 9  | <b>0.250</b> | 0.063 | 0.623 | <b>0.818</b> | 0.493 | 0.954 | Primary   | Simultaneously   | unclear | unclear  | ~60% HTN | ~20% DM | ICU/CCU           | 1.4 |
| PCWP Bhella et al, 2011 (39)                                 | 2  | 3  | 1  | 4  | <b>0.400</b> | 0.100 | 0.800 | <b>0.800</b> | 0.309 | 0.973 | Primary   | Simultaneously   | 100% HF | no CAD   | 100% HTN | ~60% DM | research          | 2.0 |
| LVEDP Dokainish et al, 2010 (35)                             | 4  | 19 | 3  | 96 | <b>0.174</b> | 0.067 | 0.382 | <b>0.970</b> | 0.910 | 0.990 | Primary   | NOT simultaneous | unclear | some CAD | ~90% HTN | ~40% DM | angiography       | 5.8 |
| LVEDP Bruch et al, 2005 (22) EF>45%                          | 2  | 13 | 0  | 11 | <b>0.156</b> | 0.046 | 0.417 | <b>0.958</b> | 0.575 | 0.997 | Supplemer | NOT simultaneous | 100% HF | some CAD | ~80% HTN | unclear | dyspnea           | 3.7 |
| LVEDP Penicka et al, 2010 (38) Uncertainty with 10% patients | 6  | 4  | 8  | 12 | <b>0.600</b> | 0.297 | 0.842 | <b>0.600</b> | 0.380 | 0.786 | Supplemer | Simultaneously   | ~70% HF | no CAD   | ~70% HTN | ~30% DM | dyspnea           | 1.5 |

LVFP=left ventricular filling pressure; LVEDP=left ventricular end diastolic pressure; LVMDP=left ventricular mean diastolic pressure; Pre-A DP=left ventricular pre-A wave diastolic pressure; PCWP=pulmonary capillary wedge pressure; CI=confidence interval; HFpEF=heart failure with preserved Ejection Fraction; CAD=coronary artery disease; HTN=hypertension; DM=diabetes mellitus; ICU=intensive care unit; TP=true positive; FP= false positive; FN= false negative; TN=true negative; Sens.= sensitivity; Spec.=specificity; LR+=positive likelihood ratio. Studies are identified by the first author, year of publication, and reference number (in brackets) as cited in the main text.

## A. Combined LVFP (primary and supplemental data)

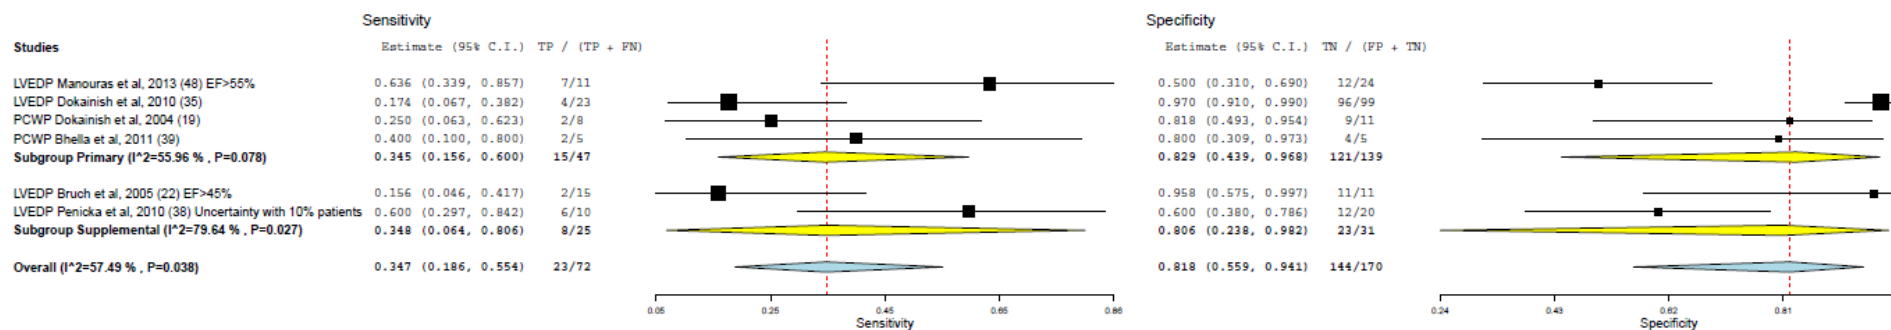

### HSROC analysis

Primary studies combined (n=4, as in Figure 4)

Sensitivity (summary) 0.36 (0.03 - 0.74)

Specificity (summary) 0.83 (0.49 - 1.0)

All studies combined (n=6)

Sensitivity (summary) 0.36 (0.10 - 0.65)

Specificity (summary) 0.84 (0.61 - 1.0)

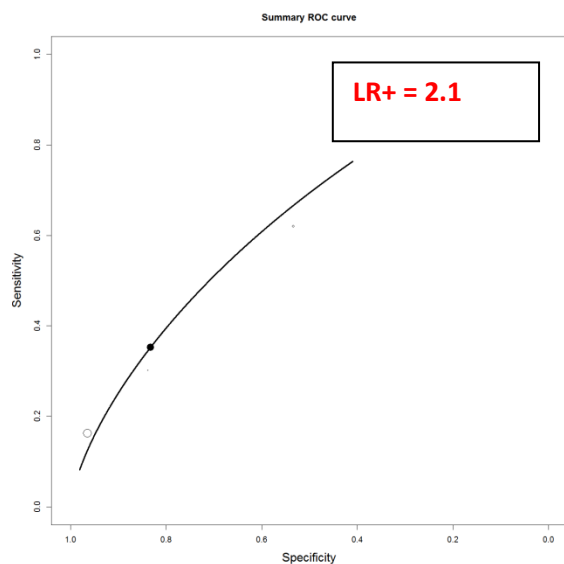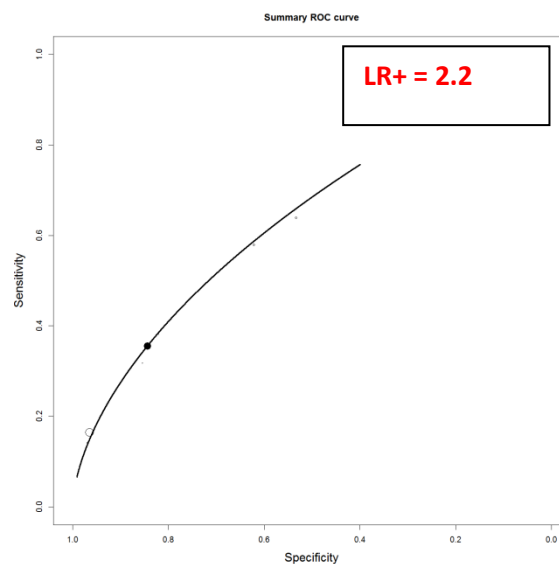

There are insufficient number of studies (n=2) with supplements data to perform a meaningful analysis.

TP=true positive; FP= false positive; FN= false negative; TN=true negative; Sens.= sensitivity; Spec.=specificity; LR+=positive likelihood ratio; HSROC=hierarchical summary receiver operating characteristic. Heterogeneity amongst the studies was estimated by I<sup>2</sup> statistic. Studies are identified by the first author, year of publication, and reference number (in brackets) as cited in the main text. OpenMetaAnalyst software (12) for Windows (64-bit version) was used for statistical analysis including graphical presentations of forest plots.

## B. Combined LVFP (Simultaneous and not simultaneous measurements)

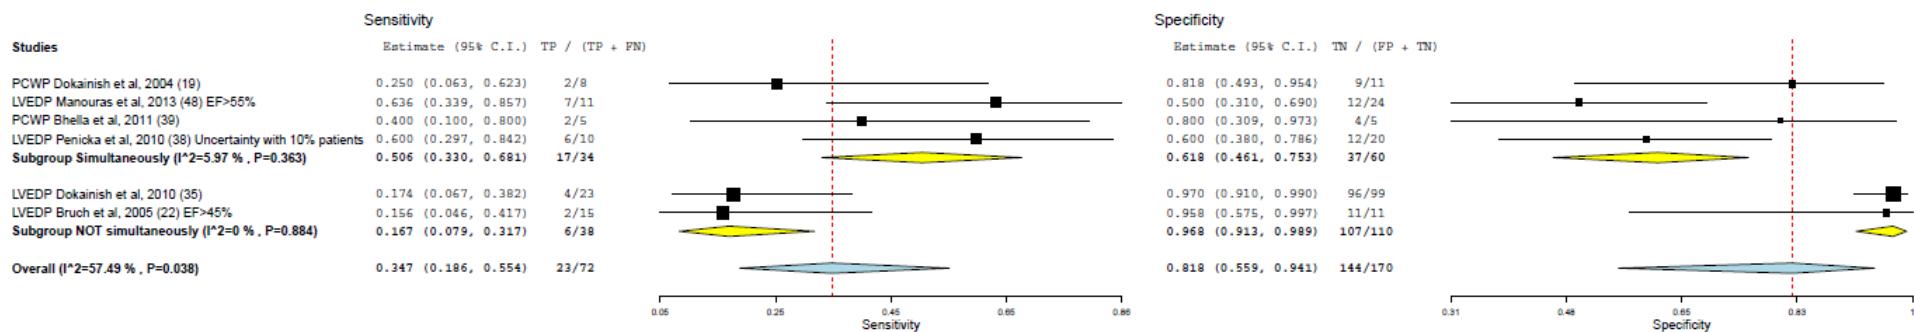

### HSROC analysis

Simultaneous studies combined (n=4)  
 Sensitivity (summary) 0.48 (0.13 - 0.80)  
 Specificity (summary) 0.66 (0.38 - 0.91)

All studies combined (n=6)  
 Sensitivity (summary) 0.36 (0.10 - 0.65)  
 Specificity (summary) 0.84 (0.61- 1.0)

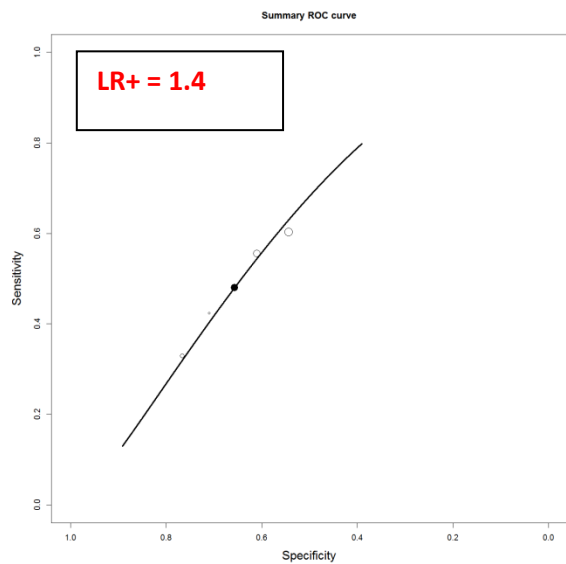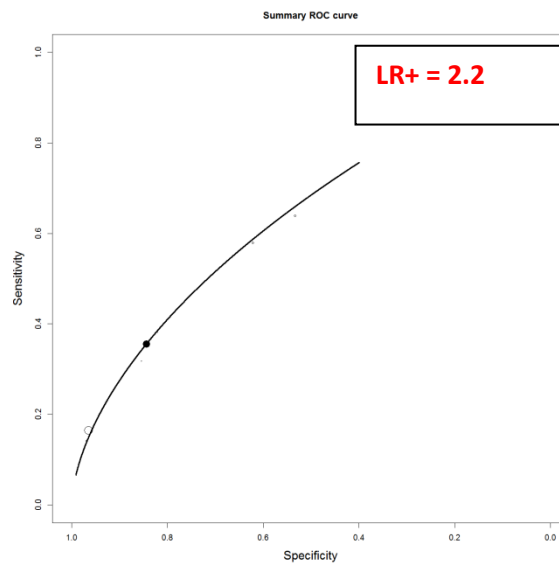

There are insufficient number of studies (n=2) with NOT simultaneous measurements to perform a meaningful analysis.

### C. Separate analysis for LVFP measurements

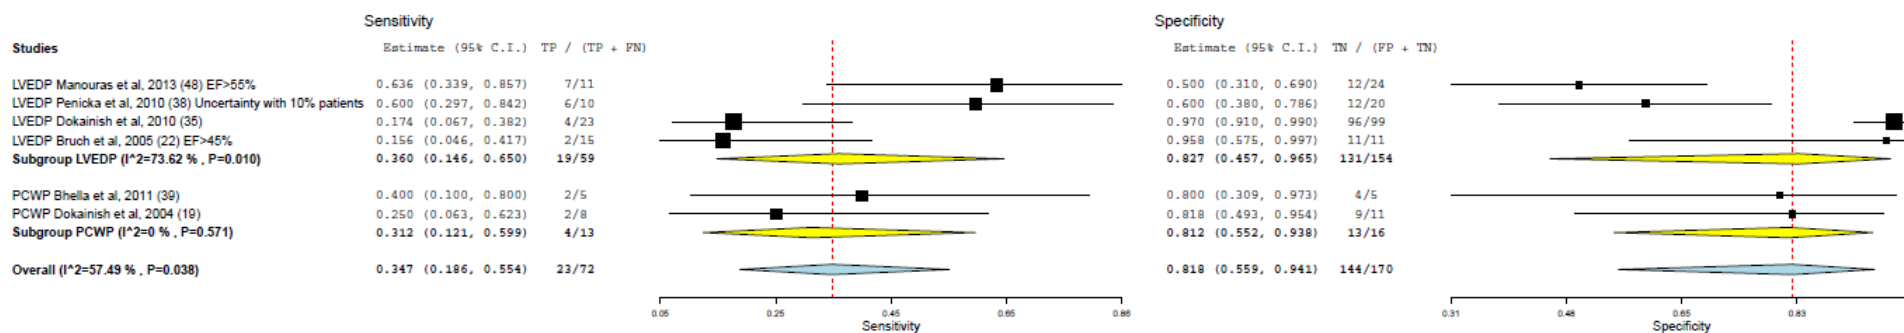

### HSROC analysis

LVEDP studies (n=4)

Sensitivity (summary) 0.36 (0.05 – 1.0)

Specificity (summary) 0.86 (0.47 – 1.0)

All studies combined (n=6)

Sensitivity (summary) 0.36 (0.10 - 0.65)

Specificity (summary) 0.84 (0.61- 1.0)

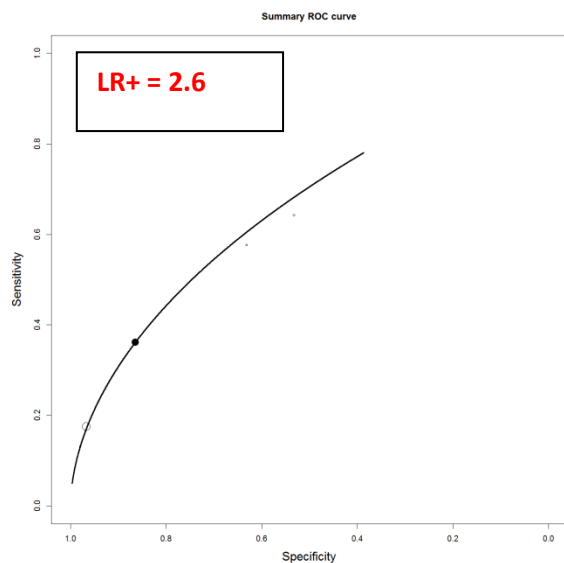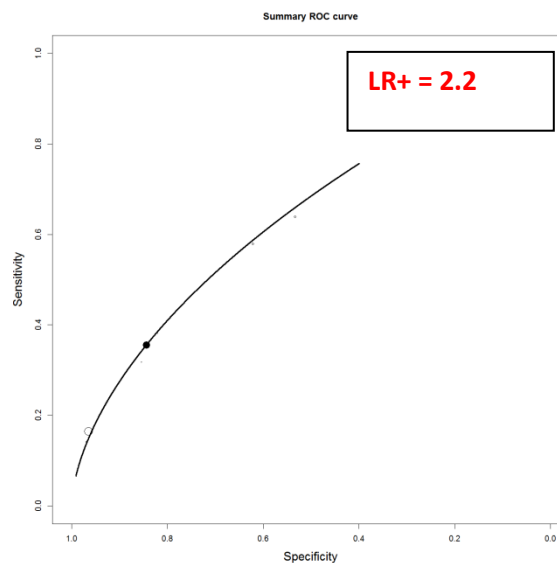

There are insufficient number of studies (n=2) that measured PCWP measurements) to perform a meaningful analysis.

## D. PRIMARY DATA SUMMARY - Primary studies only (Simultaneous and Not Simultaneous)

### Primary Simultaneous studies

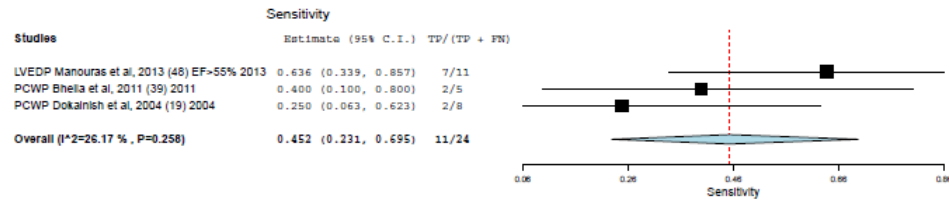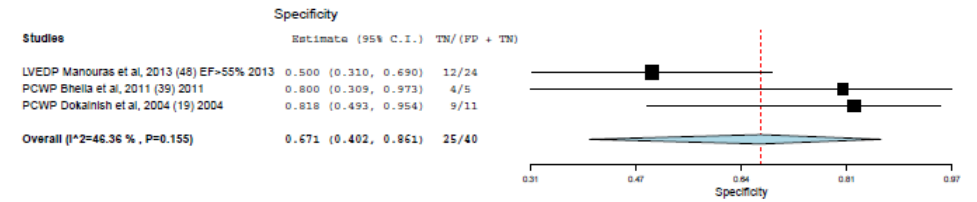

### All Primary studies

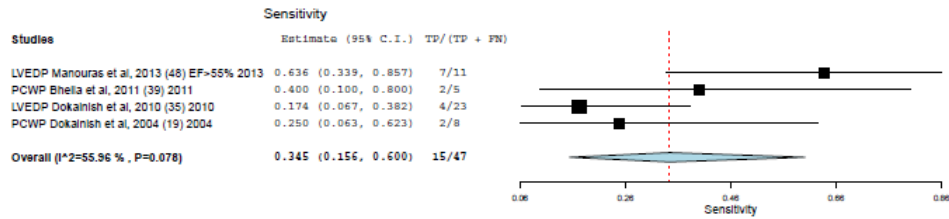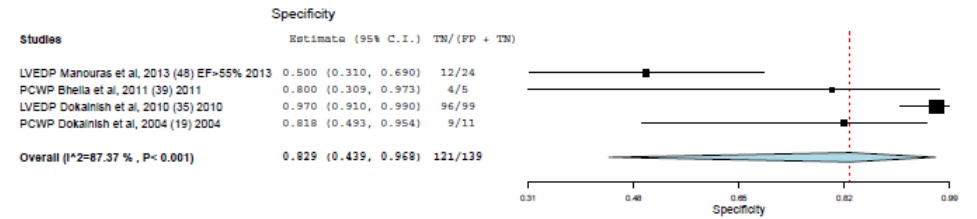

### HSROC analysis

Primary Simultaneous studies (n=3)

Sensitivity (summary) 0.43 (0.01 – 0.81)

Specificity (summary) 0.69 (0.35 – 1.0)

All Primary studies (n=4)

Sensitivity (summary) 0.36 (0.03 - 0.74)

Specificity (summary) 0.83 (0.49- 1.0)

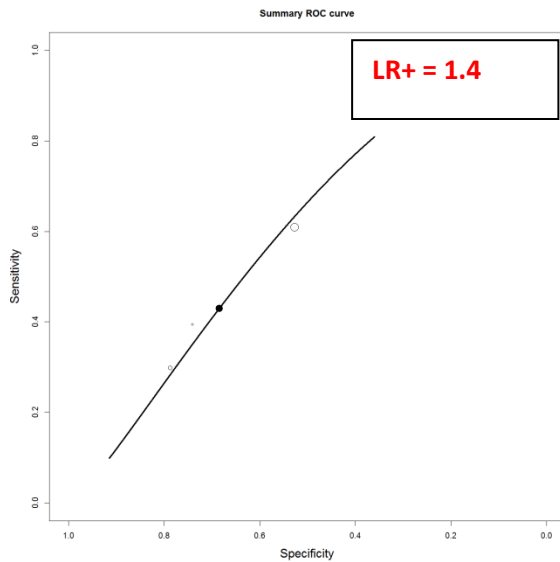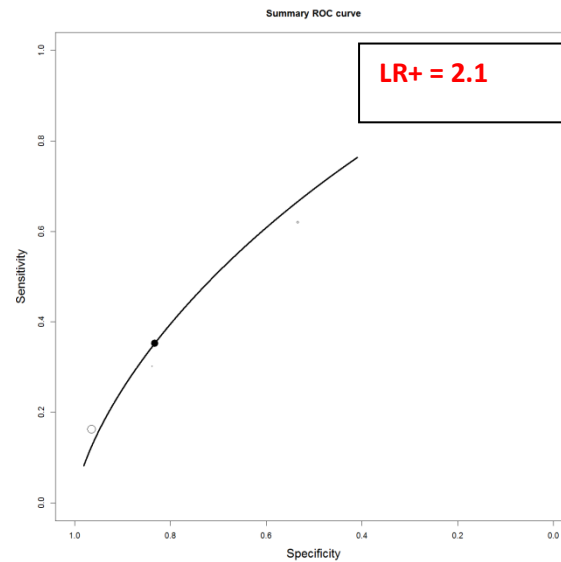

### 8.3. Subgroup analysis for $E/e'_{\text{septal}} < 8$ to identify normal LVFP

#### $E/e'_{\text{septal}}$ : Dataset for subgroup analysis (see also Tables 1 and 2)

| study                                                        | TP | FN | FP | TN | SENS.        | lower | upper | SPEC.        | lower | upper | Data      | Timing         | % HFpEF | % CAD    | % HTN    | % DM    | Indication for cath | LR+  |
|--------------------------------------------------------------|----|----|----|----|--------------|-------|-------|--------------|-------|-------|-----------|----------------|---------|----------|----------|---------|---------------------|------|
| LVMDP Ommen et al, 2000 (15)                                 | 21 | 22 | 2  | 16 | <b>0.488</b> | 0.344 | 0.634 | <b>0.889</b> | 0.648 | 0.972 | Primary   | Simultaneously | Unclear | Unclear  | Unclear  | Unclear | Unclear             | 4.4  |
| PCWP Rivas-Gotz et al, 2003 (18)                             | 8  | 8  | 1  | 35 | <b>0.500</b> | 0.273 | 0.727 | <b>0.972</b> | 0.827 | 0.996 | Primary   | Simultaneously | Unclear | Unclear  | Unclear  | Unclear | ICU/Cath lab        | 17.9 |
| LVMDP Rudko et al, 2008 (32)                                 | 14 | 11 | 4  | 14 | <b>0.560</b> | 0.366 | 0.737 | <b>0.778</b> | 0.535 | 0.914 | Primary   | Simultaneously | ~20% HF | ~80% CAD | ~50% HTN | Unclear | Unclear             | 2.5  |
| LVEDP Penicka et al, 2010 (38) Uncertainty with 10% patients | 6  | 4  | 8  | 12 | <b>0.600</b> | 0.297 | 0.842 | <b>0.600</b> | 0.380 | 0.786 | Supplemer | Simultaneously | ~70% HF | no CAD   | ~70% HTN | ~30% DM | dyspnea             | 1.5  |

LVFP=left ventricular filling pressure; LVEDP=left ventricular end diastolic pressure; LVMDP=left ventricular mean diastolic pressure; Pre-A DP=left ventricular pre-A wave diastolic pressure; PCWP=pulmonary capillary wedge pressure; CI=confidence interval; HFpEF=heart failure with preserved Ejection Fraction; CAD=coronary artery disease; HTN=hypertension; DM=diabetes mellitus; ICU=intensive care unit; TP=true positive; FP= false positive; FN= false negative; TN=true negative; Sens.= sensitivity; Spec.=specificity; LR+=positive likelihood ratio. Studies are identified by the first author, year of publication, and reference number (in brackets) as cited in the main text.



## A. Combined LVFP (primary and supplemental data)

### Primary studies

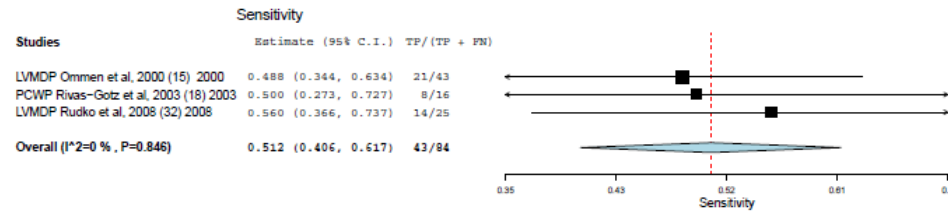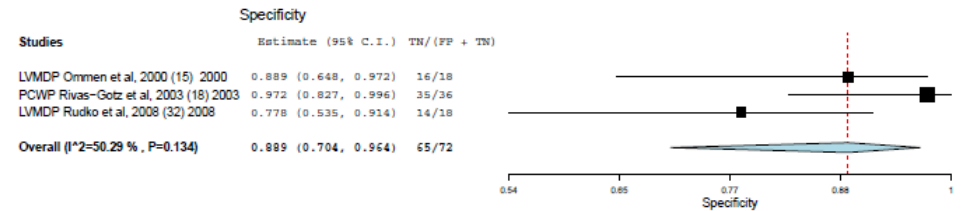

### All studies

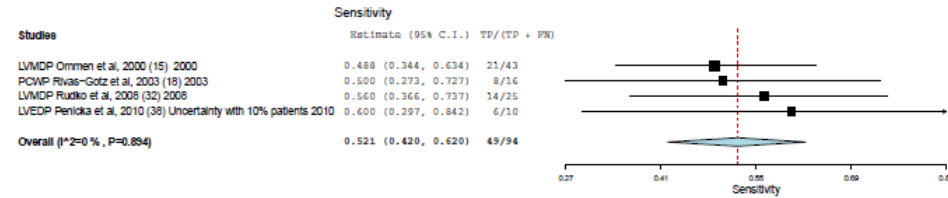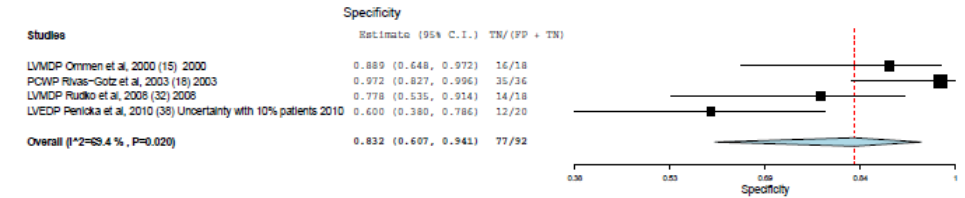

### HSROC analysis

#### Primary studies (n=3)

Sensitivity (summary) 0.50 (0.14 – 0.81)

Specificity (summary) 0.89 (0.66 – 1.0)

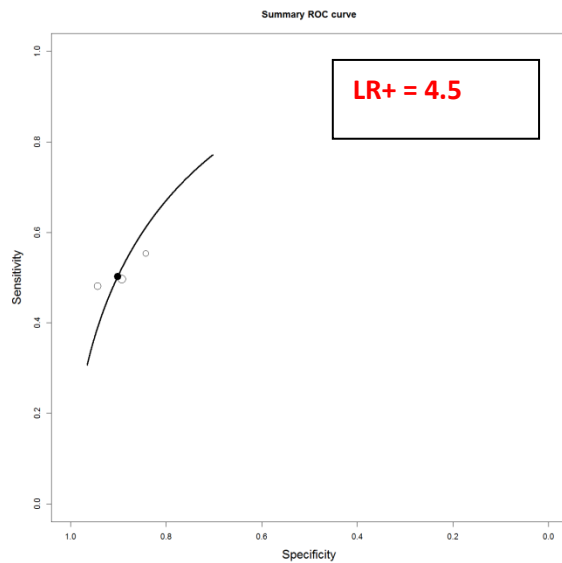

#### All studies (n=4)

Sensitivity (summary) 0.54 (0.25 - 0.82)

Specificity (summary) 0.84 (0.61 – 1.0)

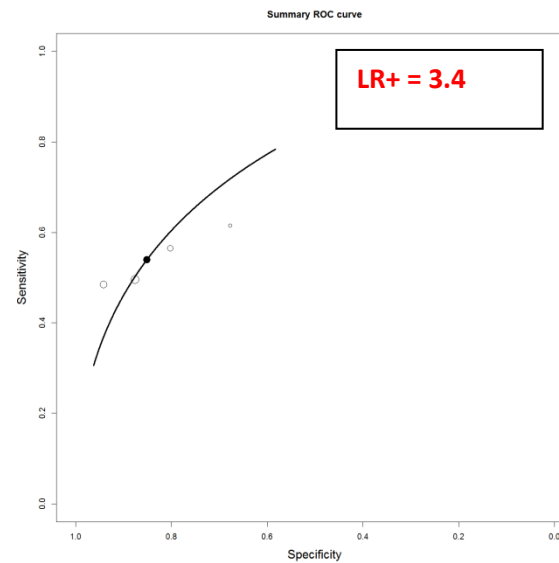

TP=true positive; FP= false positive; FN= false negative; TN=true negative; Sens.= sensitivity; Spec.=specificity; LR+=positive likelihood ratio; HSROC=hierarchical summary receiver operating characteristic. Heterogeneity amongst the studies was estimated by I<sup>2</sup> statistic. Studies are identified by the first author, year of publication, and reference number (in brackets) as cited in the main text. OpenMetaAnalyst software (12) for Windows (64-bit version) was used for statistical analysis including graphical presentations of forest plots.

## B. Combined LVFP (Simultaneous and not simultaneous measurements)

All studies are simultaneous

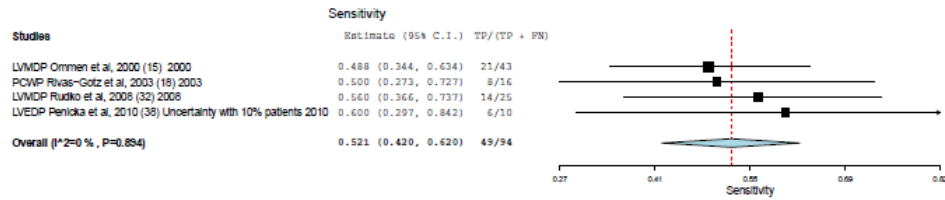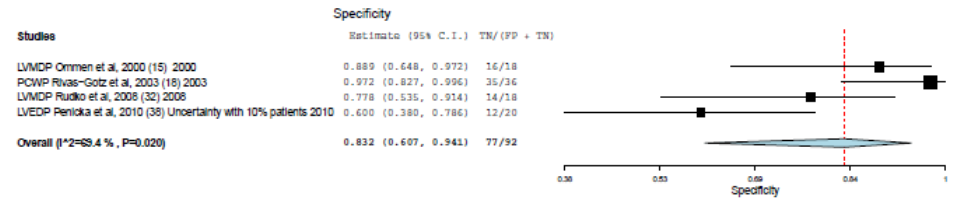

## HSROC analysis

All studies are simultaneous (n=4)

Sensitivity (summary) 0.54 (0.25 - 0.82)

Specificity (summary) 0.84 (0.61 - 1.0)

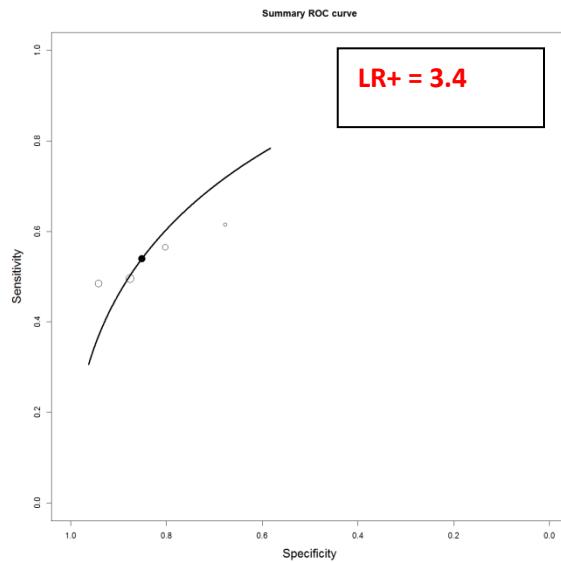

### C. PRIMARY DATA SUMMARY - Primary studies only (Simultaneous and Not Simultaneous)

All Primary studies are simultaneous

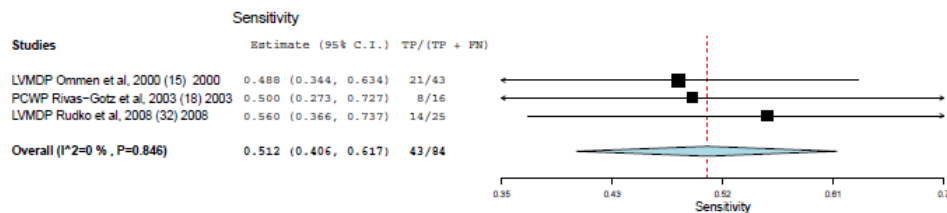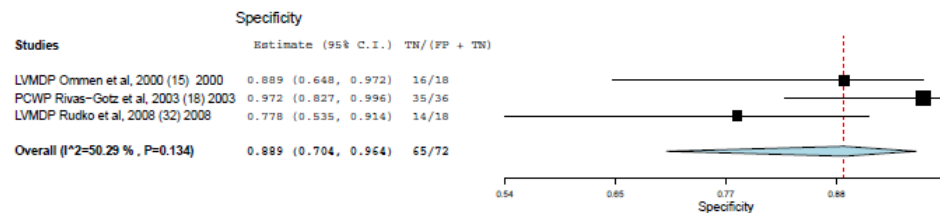

### HSROC analysis

Primary studies (n=3)

Sensitivity (summary) 0.50 (0.14 – 0.81)

Specificity (summary) 0.89 (0.66 – 1.0)

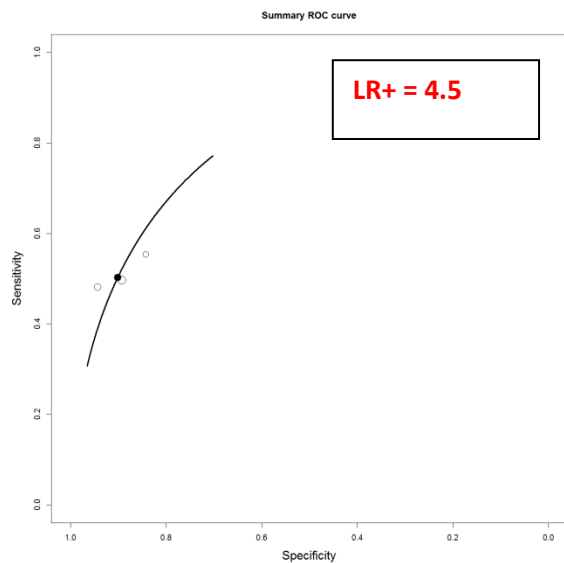

Supplement: JAH3-5-e002530-s001.pdf [file JAH3-5-e002530-s001.pdf]
